# Supplementary material for: Fused-Ring Oxazolopyrrolopyridopyrimidine Systems with Gram-Negative Activity
Source: MDPI journal article supplement (doi:10.3390/antibiotics6010002), 2017-01-13

## **Supporting Information**

### **Fused Ring Oxazolopyrrolopyridopyrimidine Systems with Selective Gram Negative Activity**

Yiyuan Chen, Jonathan G. Moloney, Mark G. Moloney\* and Amber Thompson

Department of Chemistry, Chemistry Research Laboratory, The University of Oxford, 12 Mansfield Road, Oxford. OX1 3TA.

[mark.moloney@chem.ox.ac.uk](mailto:mark.moloney@chem.ox.ac.uk)

yc48612705.1.fid  
Instrument AVC500  
Group MGM  
Project Account Code P2  
4861 Yiyuan Chen 27/5/16

4a

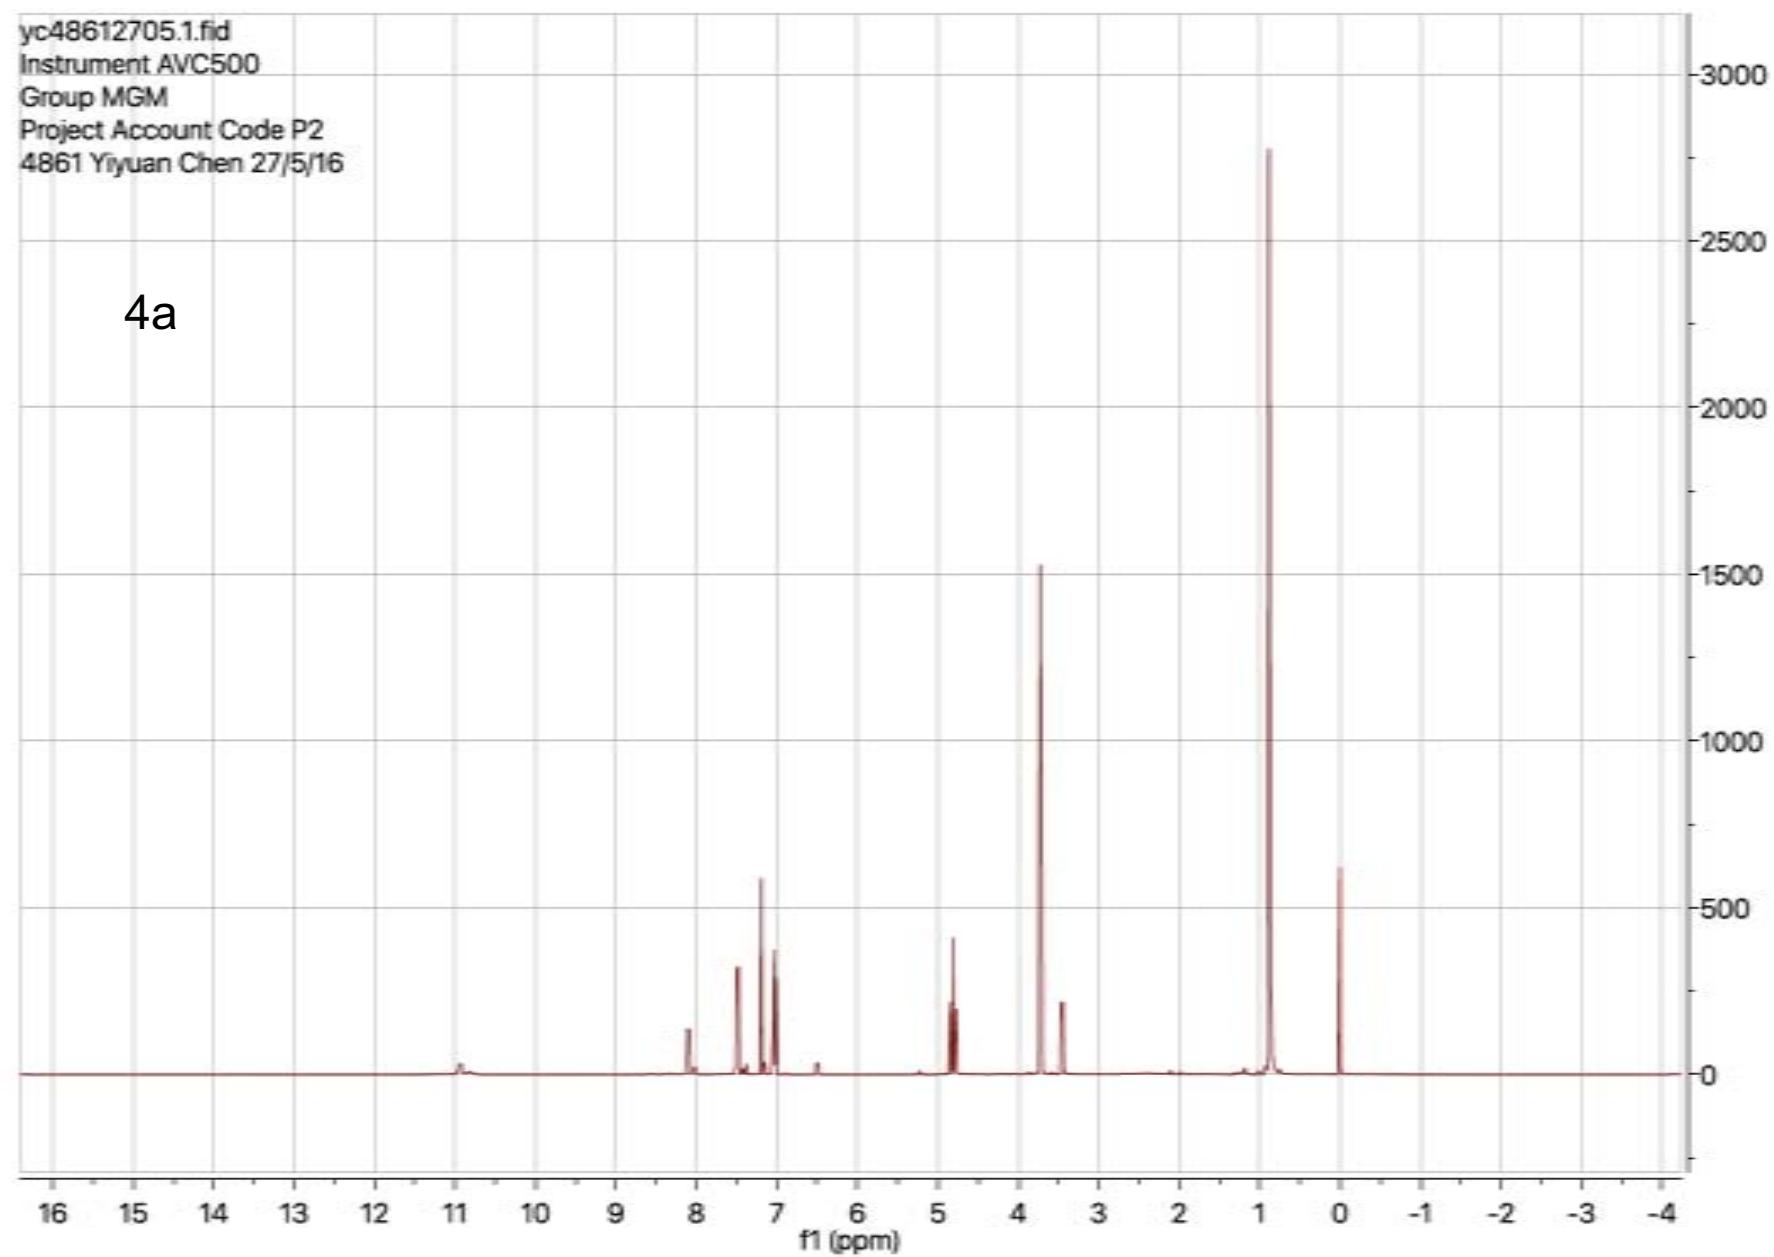

YC016 CHARACT. 4f1  
Instrument AVF400  
Chemist YIYUAN  
Group MGM  
Project Account Code DM7300  
YC016 CHARACT  
c13acq.crl CDC13 {C:\NMR} mgmgrp 58

4a

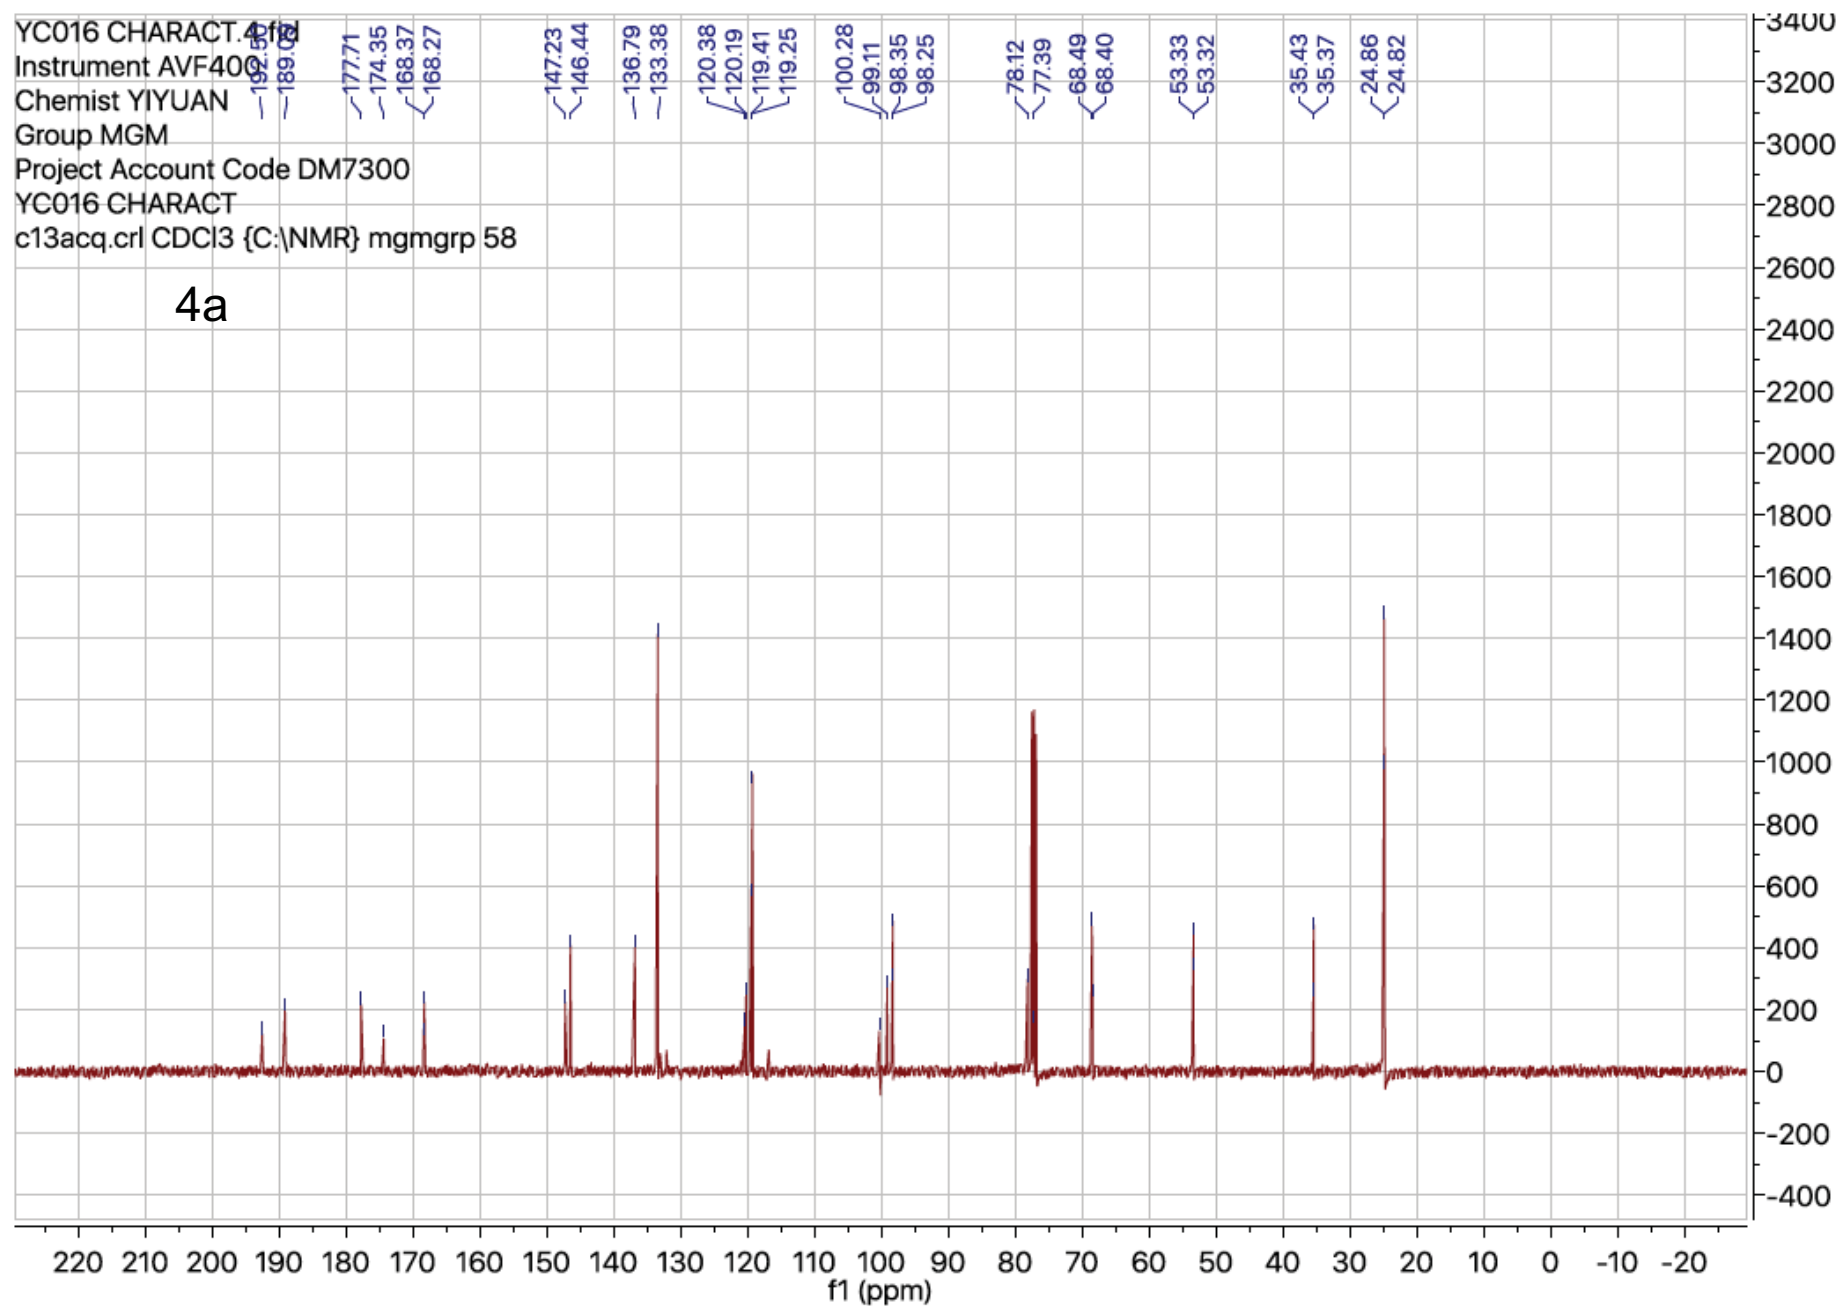

YC020 CHARACTER  
 Instrument AVG 490.8d  
 Group MGM  
 Chemist YIYUAN  
 Project Account Code DM7300  
 YC020 CHARACTER  
 h1acq.crl CDCl3 {C:\NMR} mgmgrp 41

4b

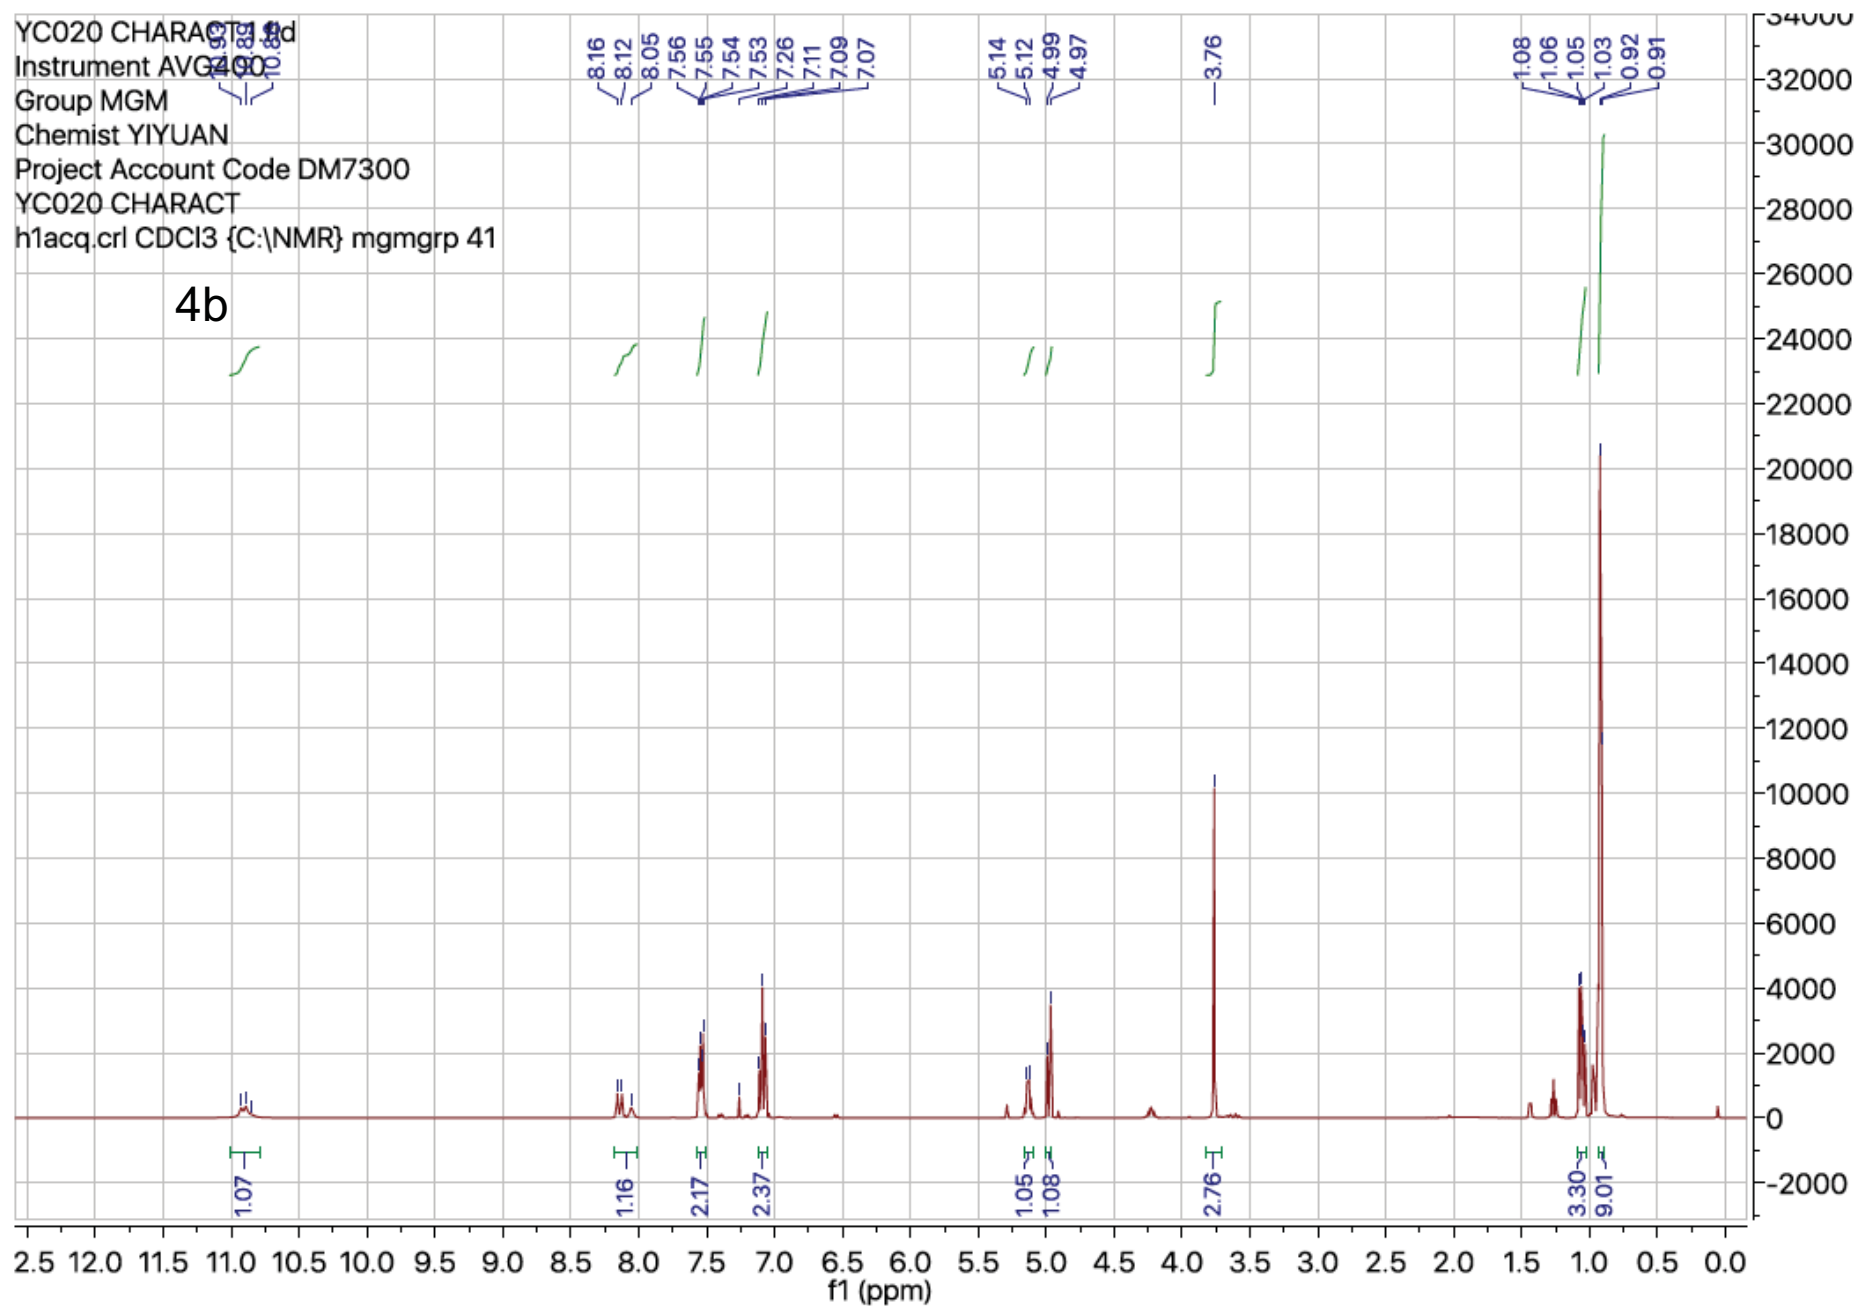

YC020 CHARACT 2.fid  
Instrument AVQ400  
Group MGM  
Chemist YIYUAN  
Project Account Code DM7300  
YC020 CHARACT  
c13acq.crl CDCl3 {C:\NMR} mgmgrp 41

4b

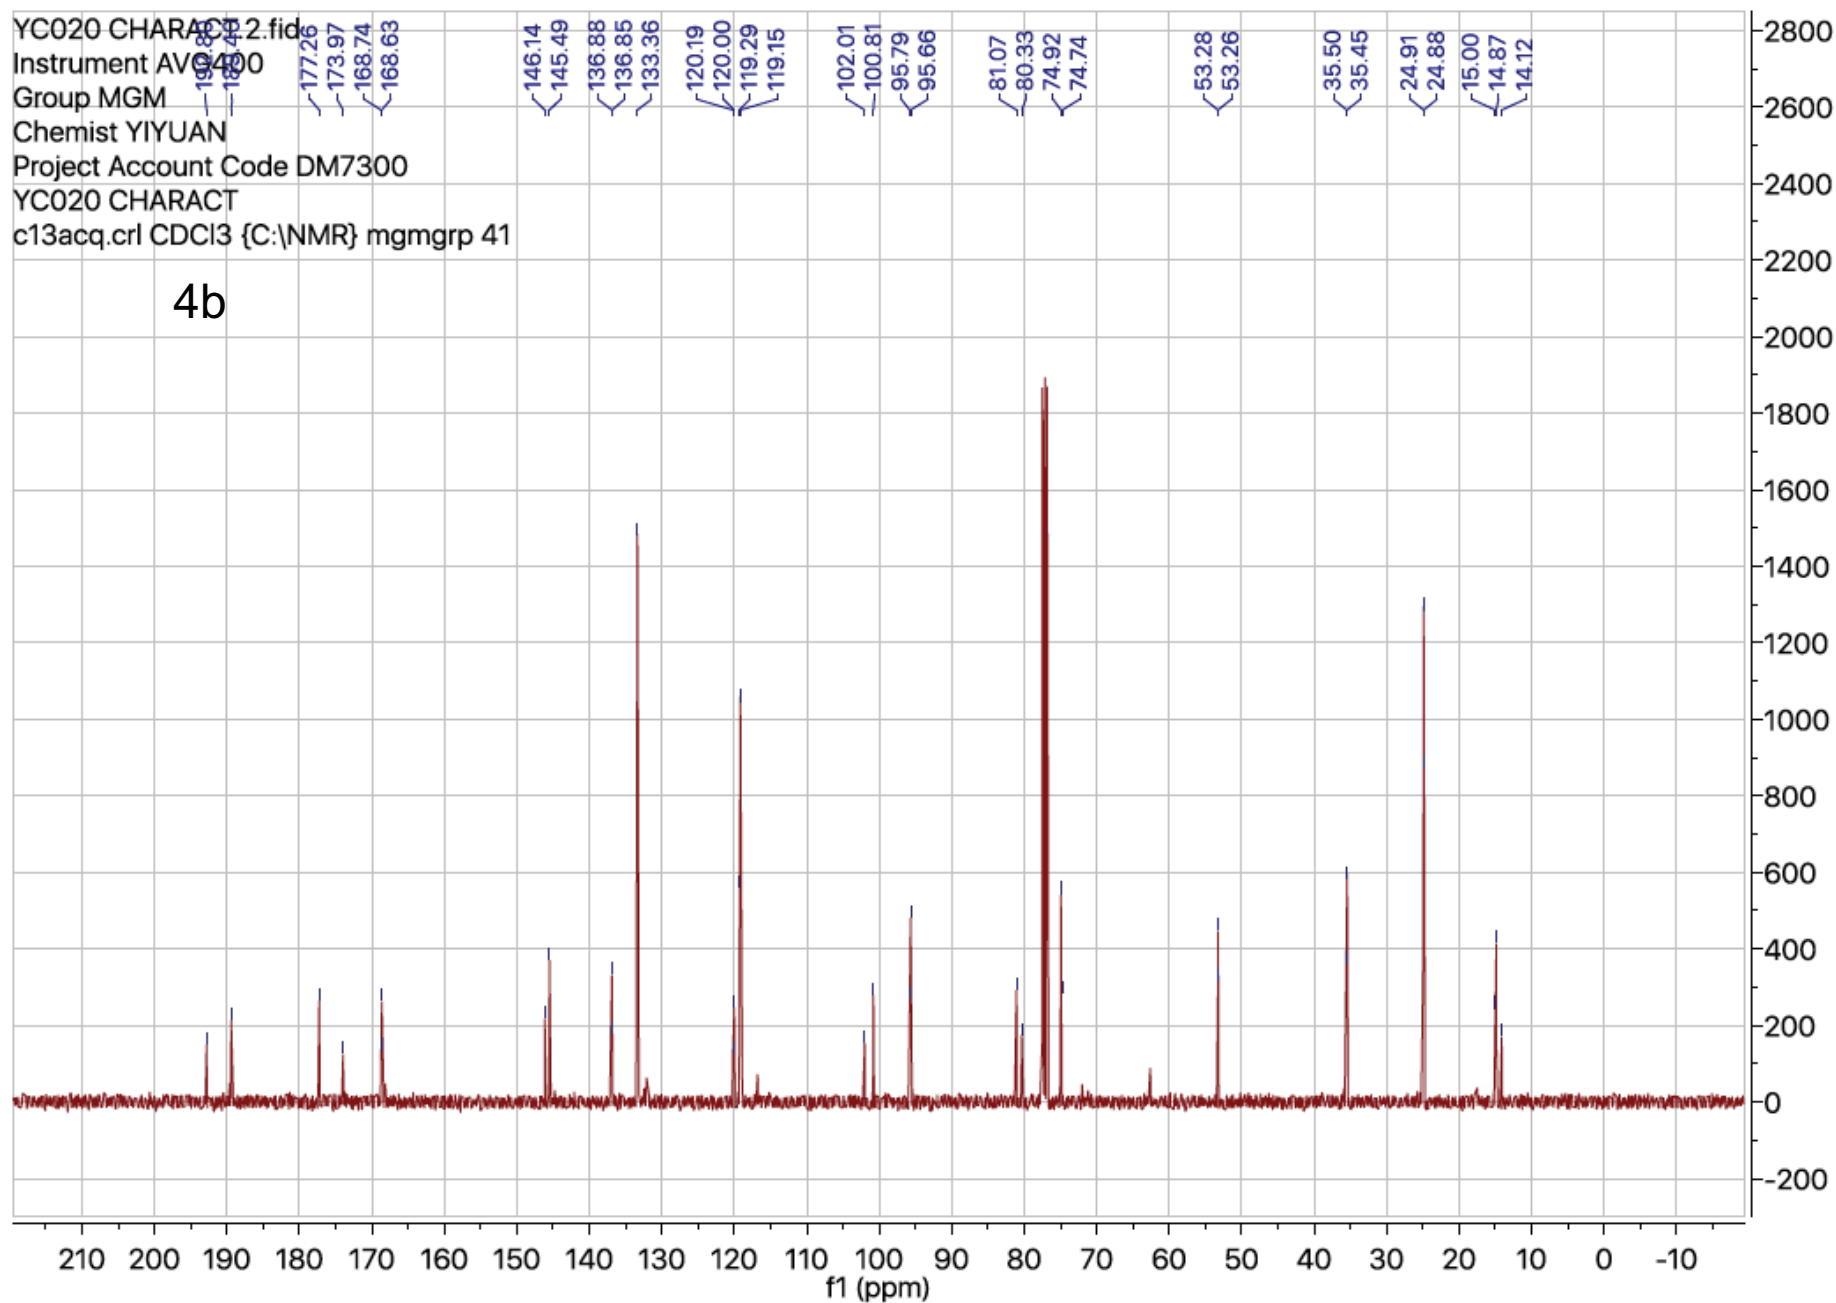

YC029 PURE CHARACTER  
Instrument AVF400  
Chemist YIYUAN  
Group MGM  
Project Account Code DM7300  
YC029 PURE CHARACTER  
h1acq.crl CDCl3 {C:\NMR} mgmgrp 6

4c

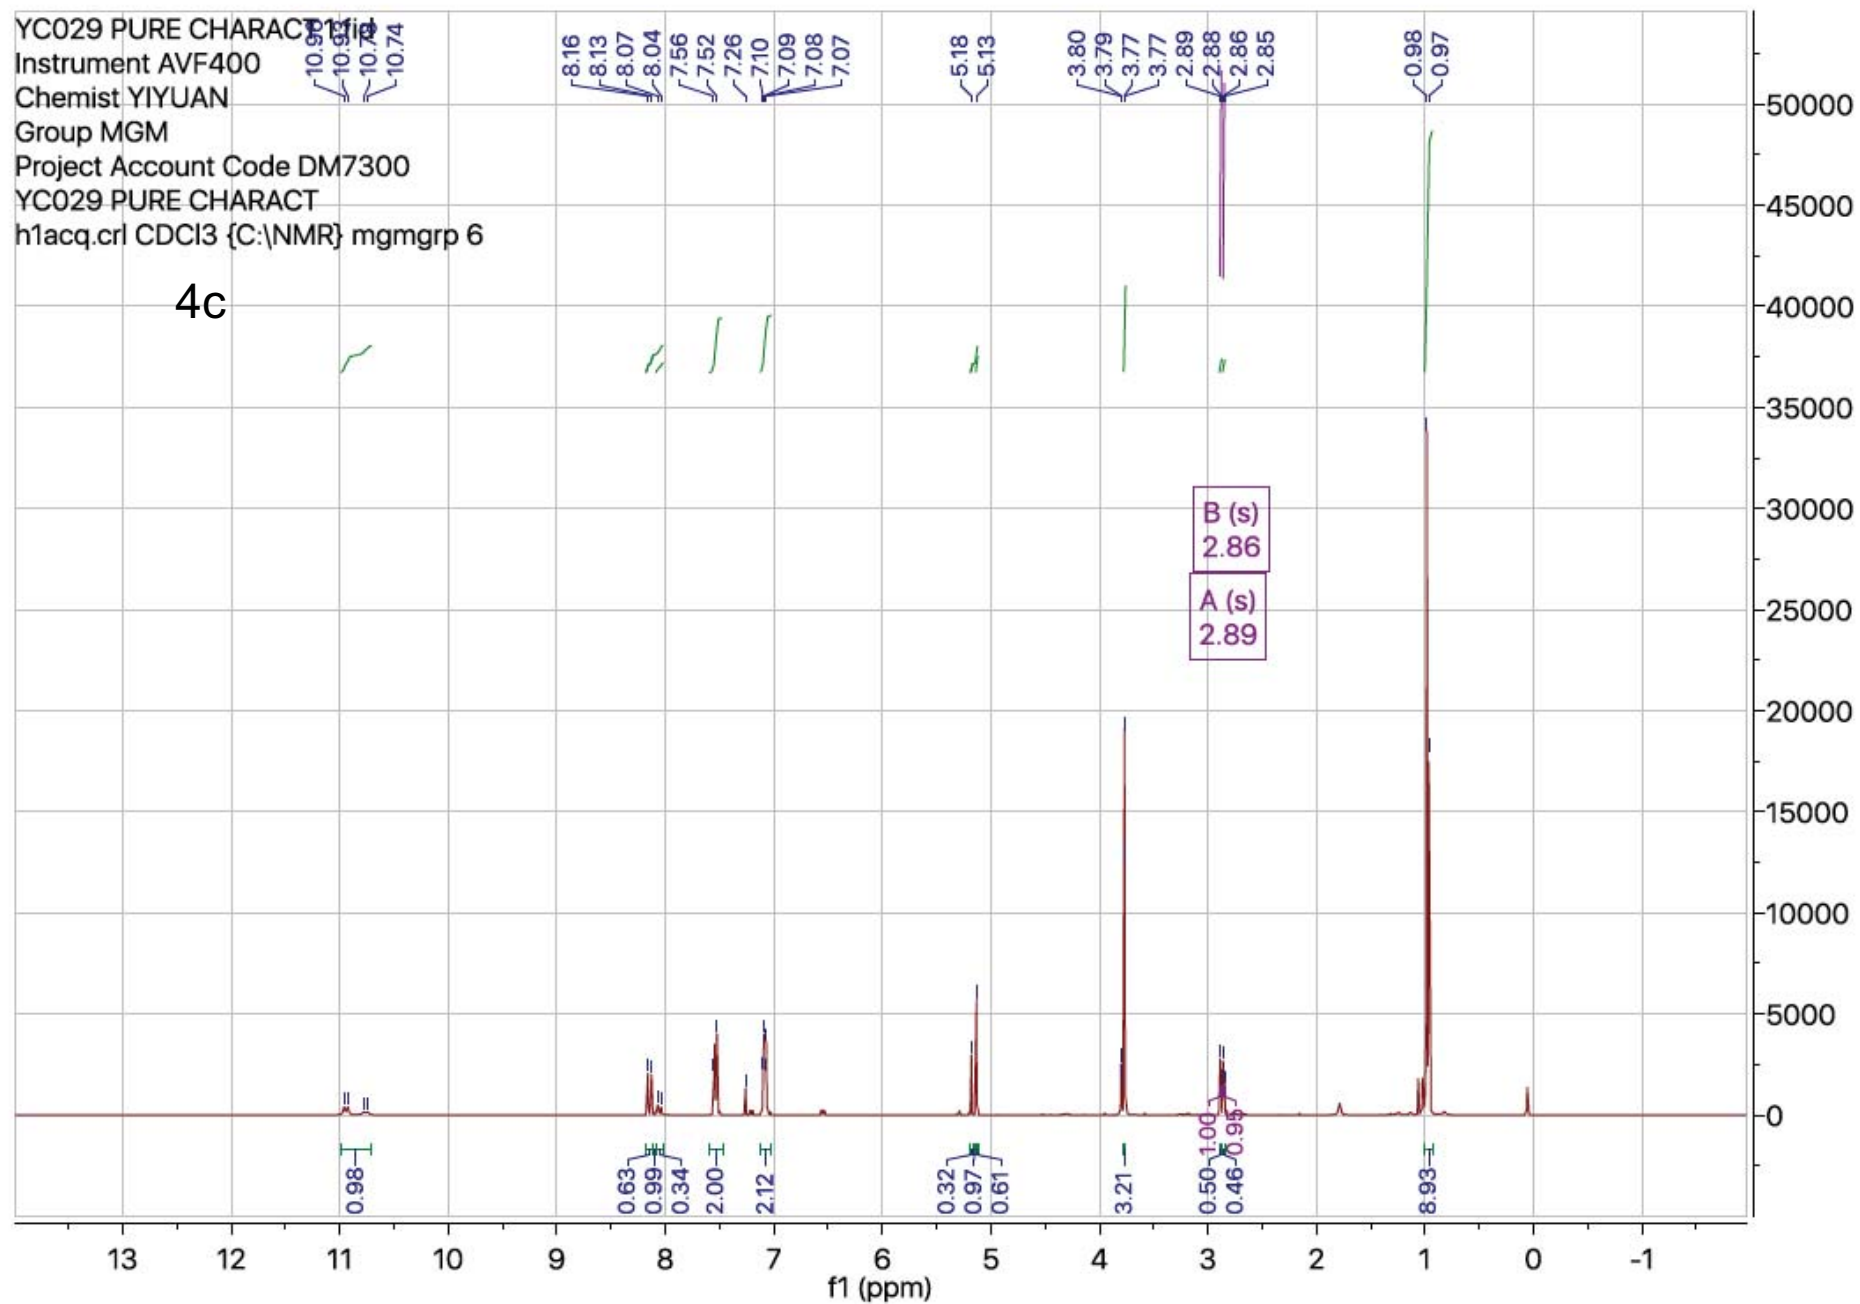

YC029 PURE CHARACTER.4.fid  
Instrument AVF4000  
Chemist YIYUAN  
Group MGM  
Project Account Code DM7300  
YC029 PURE CHARACTER  
c13acq.crl CDC13 {C:\NMR} mgmgrp 6

4c

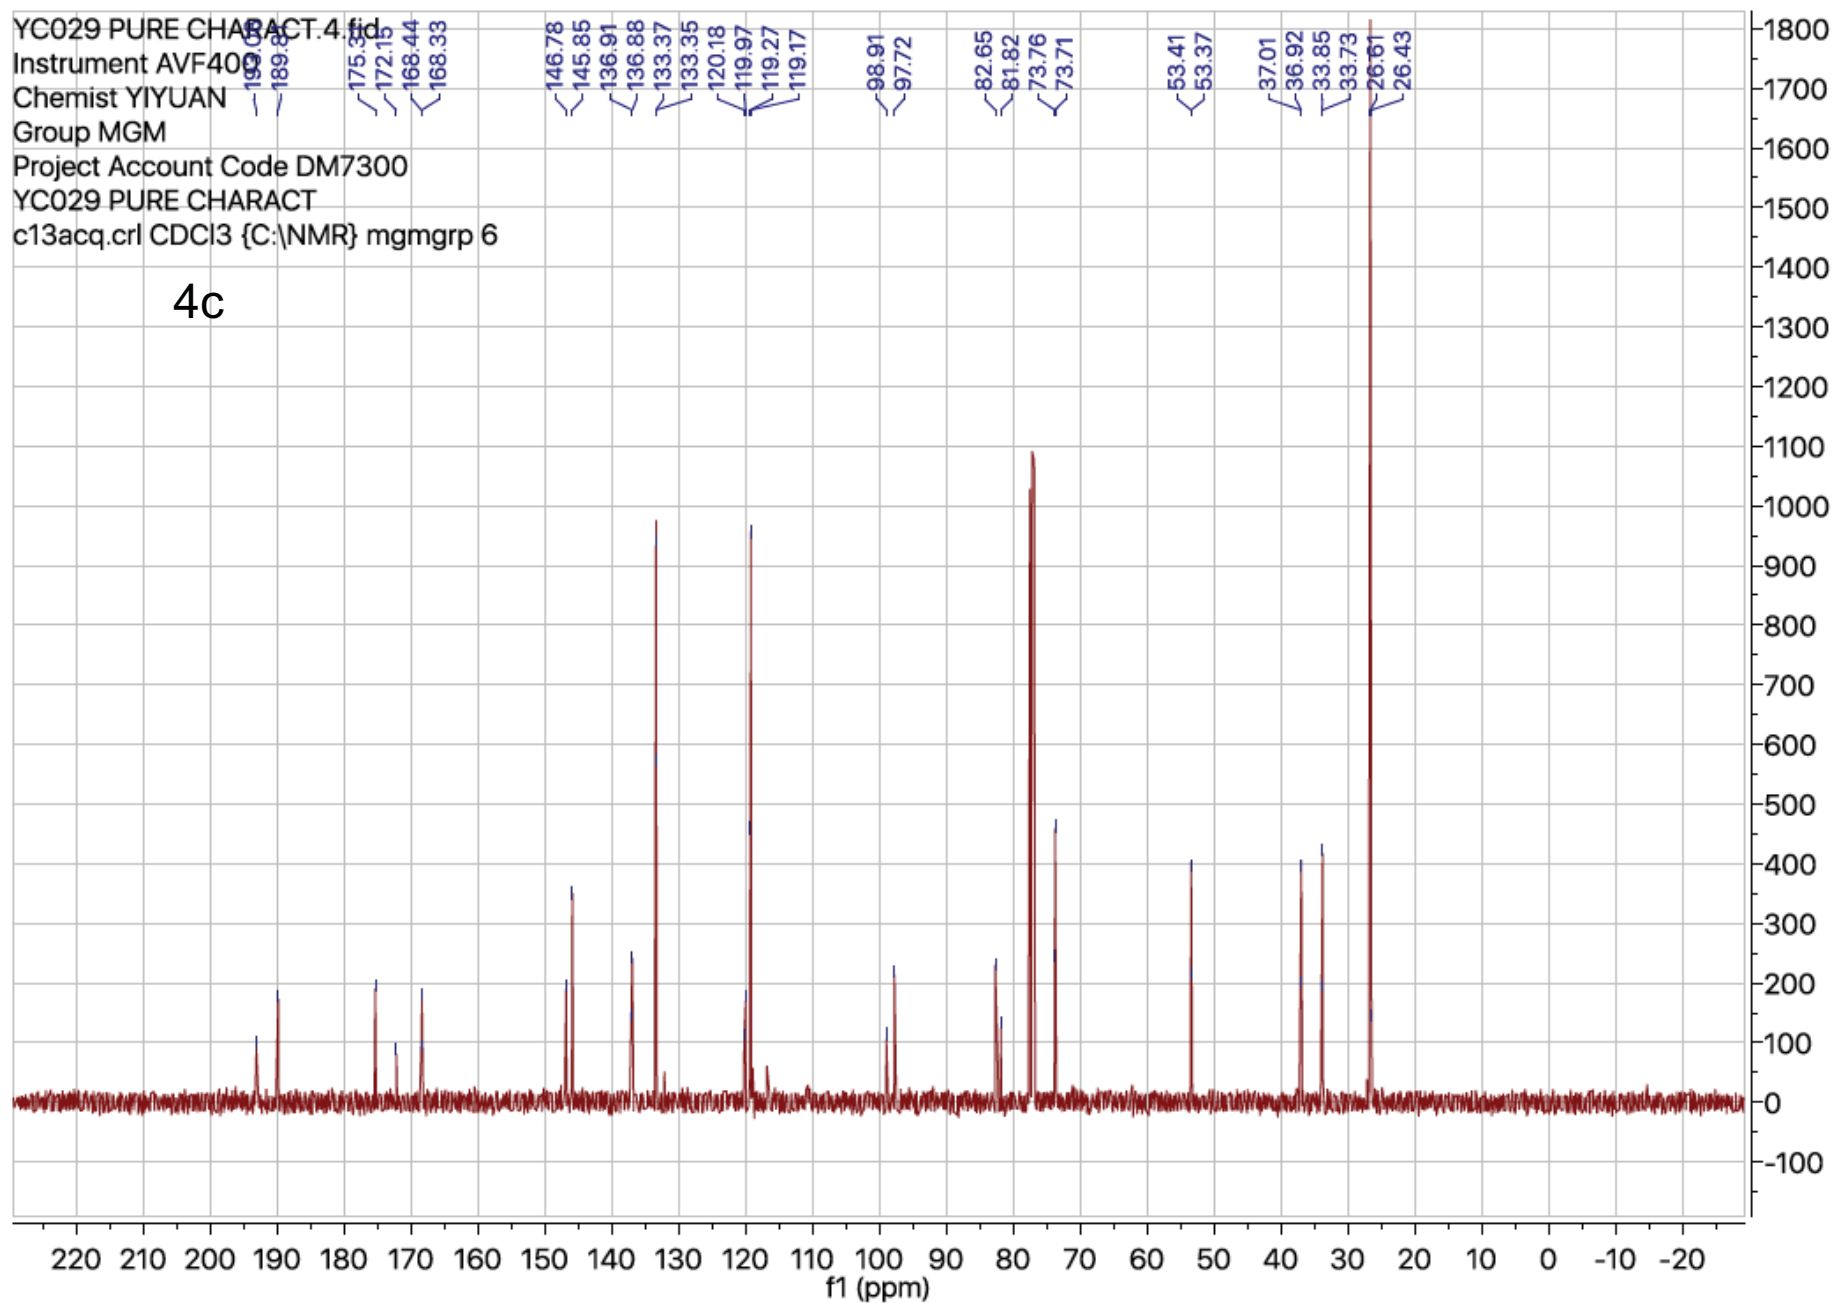

Instrument AVF400  
Chemist YIYUAN CHEN  
Group MGM  
Project Account Code DM7300  
YC046 CHARACT CD3CN  
h1acq.crl CD3CN {C:NMR} mqmgrp 46

NMR@CHEM.OX

6a

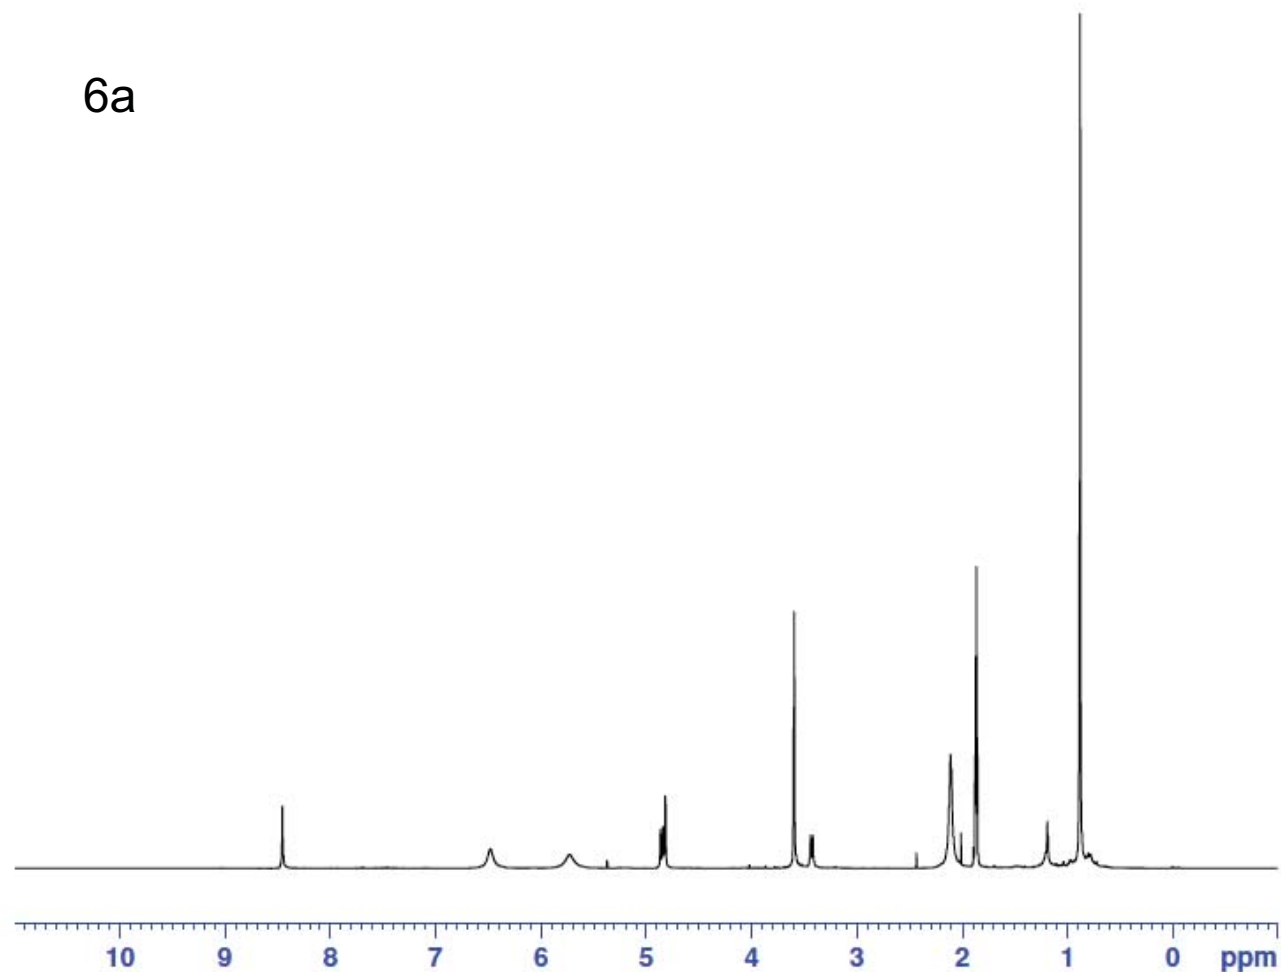

Current Data Parameters  
NAME YC046 CHARAC  
EXPNO 1  
PROCNO 1

F2 - Acquisition Parameters  
Date\_ 20160505  
Time 3.50 h  
INSTRUM avf400  
PROBHD Z108618\_0533 (  
PULPROG zg60  
TD 65536  
SOLVENT CD3CN  
NS 16  
DS 2  
SWH 8012.820 Hz  
FIDRES 0.244532 Hz  
AQ 4.0894465 sec  
RG 93  
DW 62.400 usec  
DE 6.50 usec  
TE 294.9 K  
D1 1.00000000 sec  
TD0 1  
SFO1 400.2524015 MHz  
NUC1 1H  
P1 19.50 usec  
PLW1 16.70000076 W

F2 - Processing parameters  
SI 32768  
SF 400.2500418 MHz  
WDW EM  
SSB 0  
LB 0.30 Hz  
GB 0  
PC 1.00



YC046 CHARAC.4.fid  
Instrument AVF400  
Chemist YIYUAN CHEN  
Group MGM  
Project Account Code DM7300  
YC046 CHARACT CD3CN  
c13acq.crl CD3CN {C:\NMR} mgmgrp 46

6a

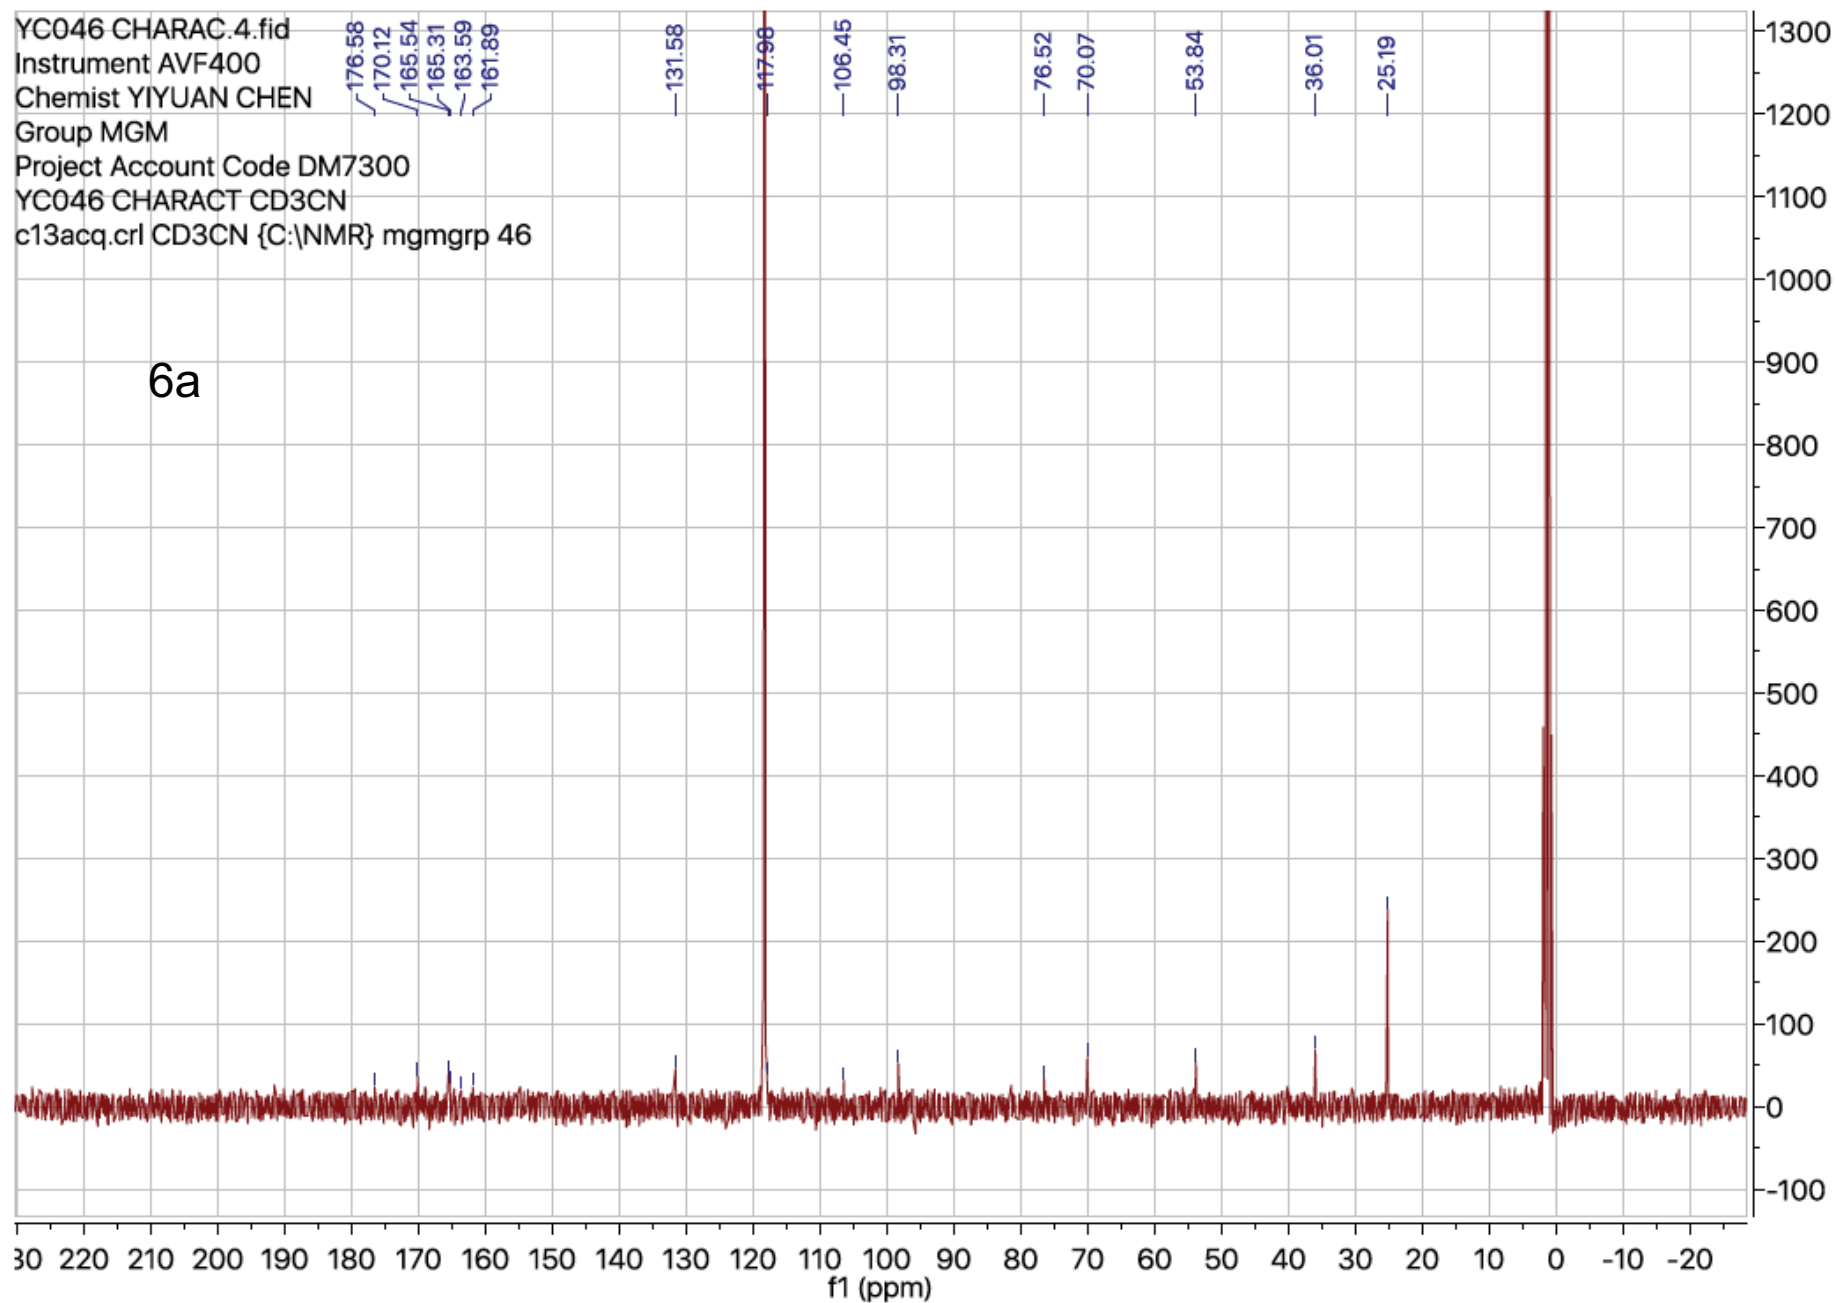

Instrument AVC500  
Group MGM  
Project Account Code DM7300  
4568 Yiyuan Chen 5/5/16

NMR@CHEM.OX

6b

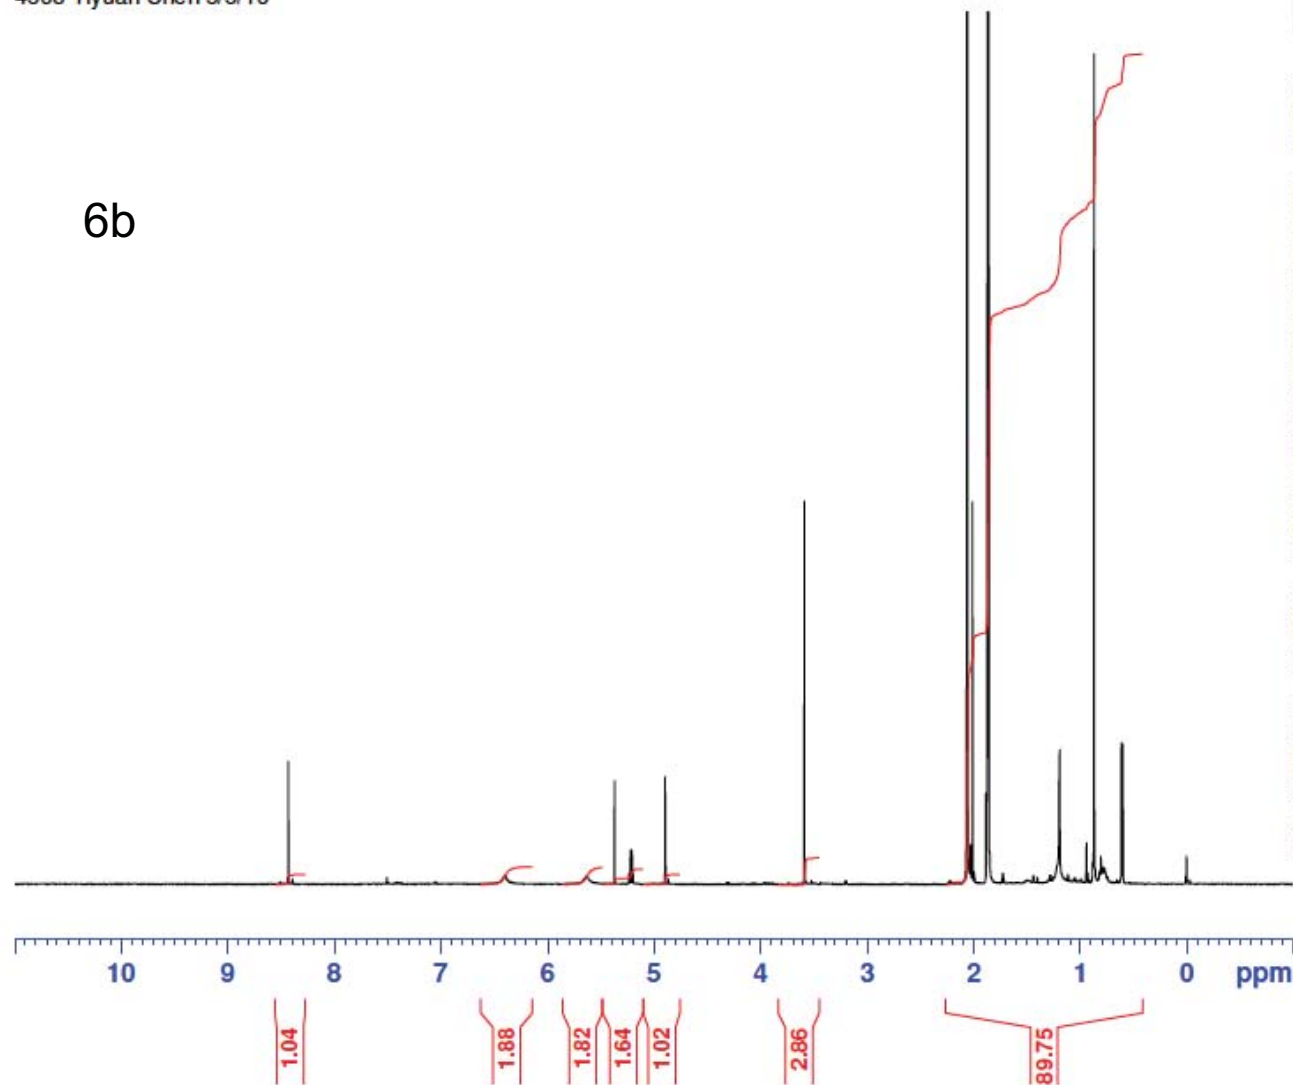

Current Data Parameters  
NAME yc45680505  
EXPNO 1  
PROCNO 1

F2 - Acquisition Parameters  
Date\_ 20160506  
Time 14.05  
INSTRUM avc500  
PROBHD 5 mm CPDUL 13C  
PULPROG zg30  
TD 65536  
SOLVENT CD3CN  
NS 16  
DS 4  
SWH 10330.578 Hz  
FIDRES 0.157632 Hz  
AQ 3.1719425 sec  
RG 2.25  
DW 48.400 usec  
DE 10.00 usec  
TE 298.0 K  
D1 1.00000000 sec  
TD0 1

----- CHANNEL f1 -----  
SFO1 500.3030896 MHz  
NUC1 1H  
P1 15.00 usec  
PLW1 7.99830008 W

F2 - Processing parameters  
SI 65536  
SF 500.3000545 MHz  
WDW EM  
SSB 0  
LB 0.30 Hz  
GB 0  
PC 1.00

yc45680505.4.fid  
Instrument AVC500  
Group MGM  
Project Account Code DM7300  
4568 Yiyuan Chen 5/5/16

6b

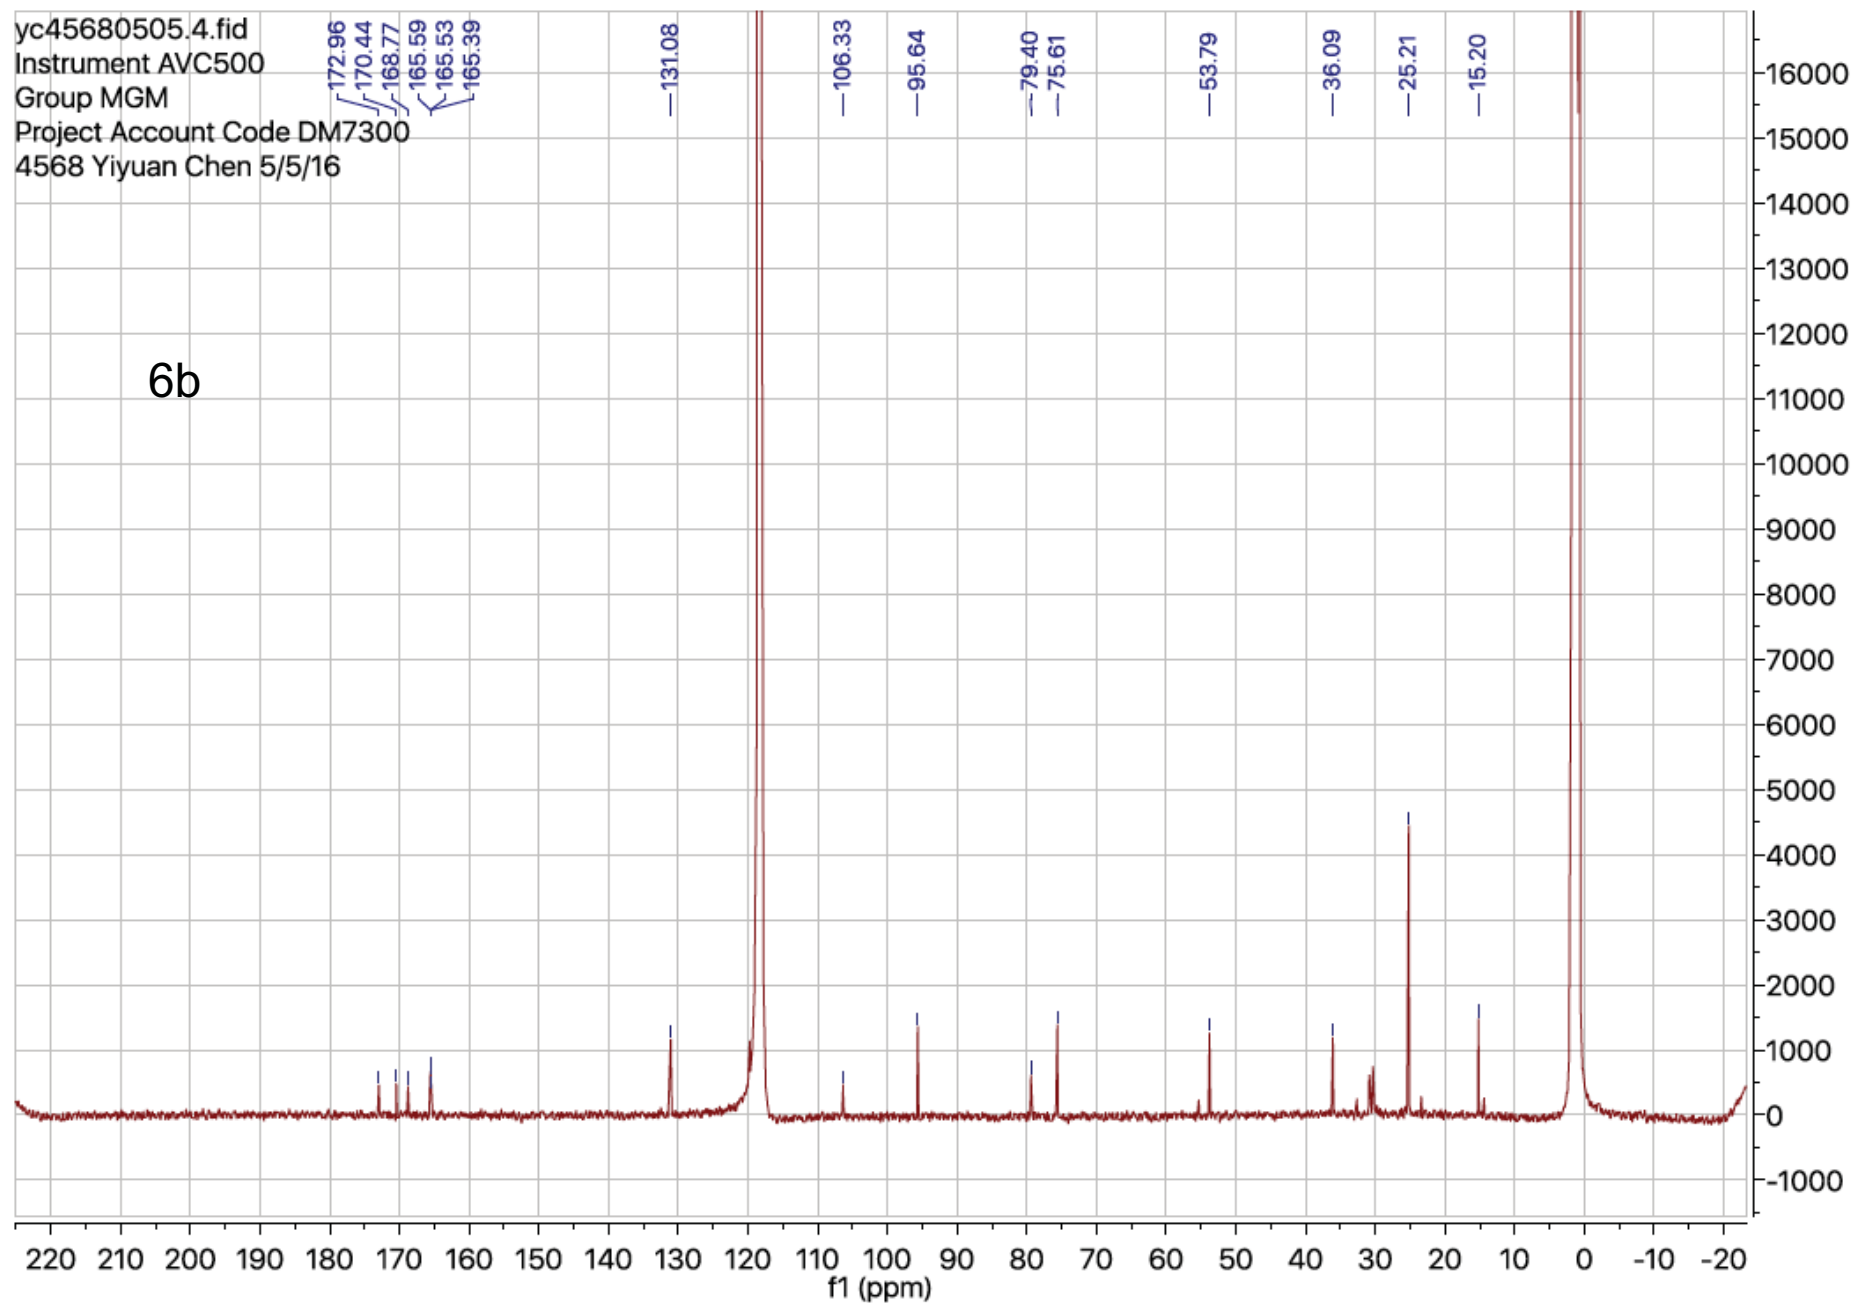

YC034 ACETONITRIEL 1.fid  
Instrument AVF400  
Chemist YIYUAN  
Group MGM  
Project Account Code DM7300  
YC034 ACETONITRILE  
h1acq.crl CD3CN {C:\NMR} mgmgrp 1

6c

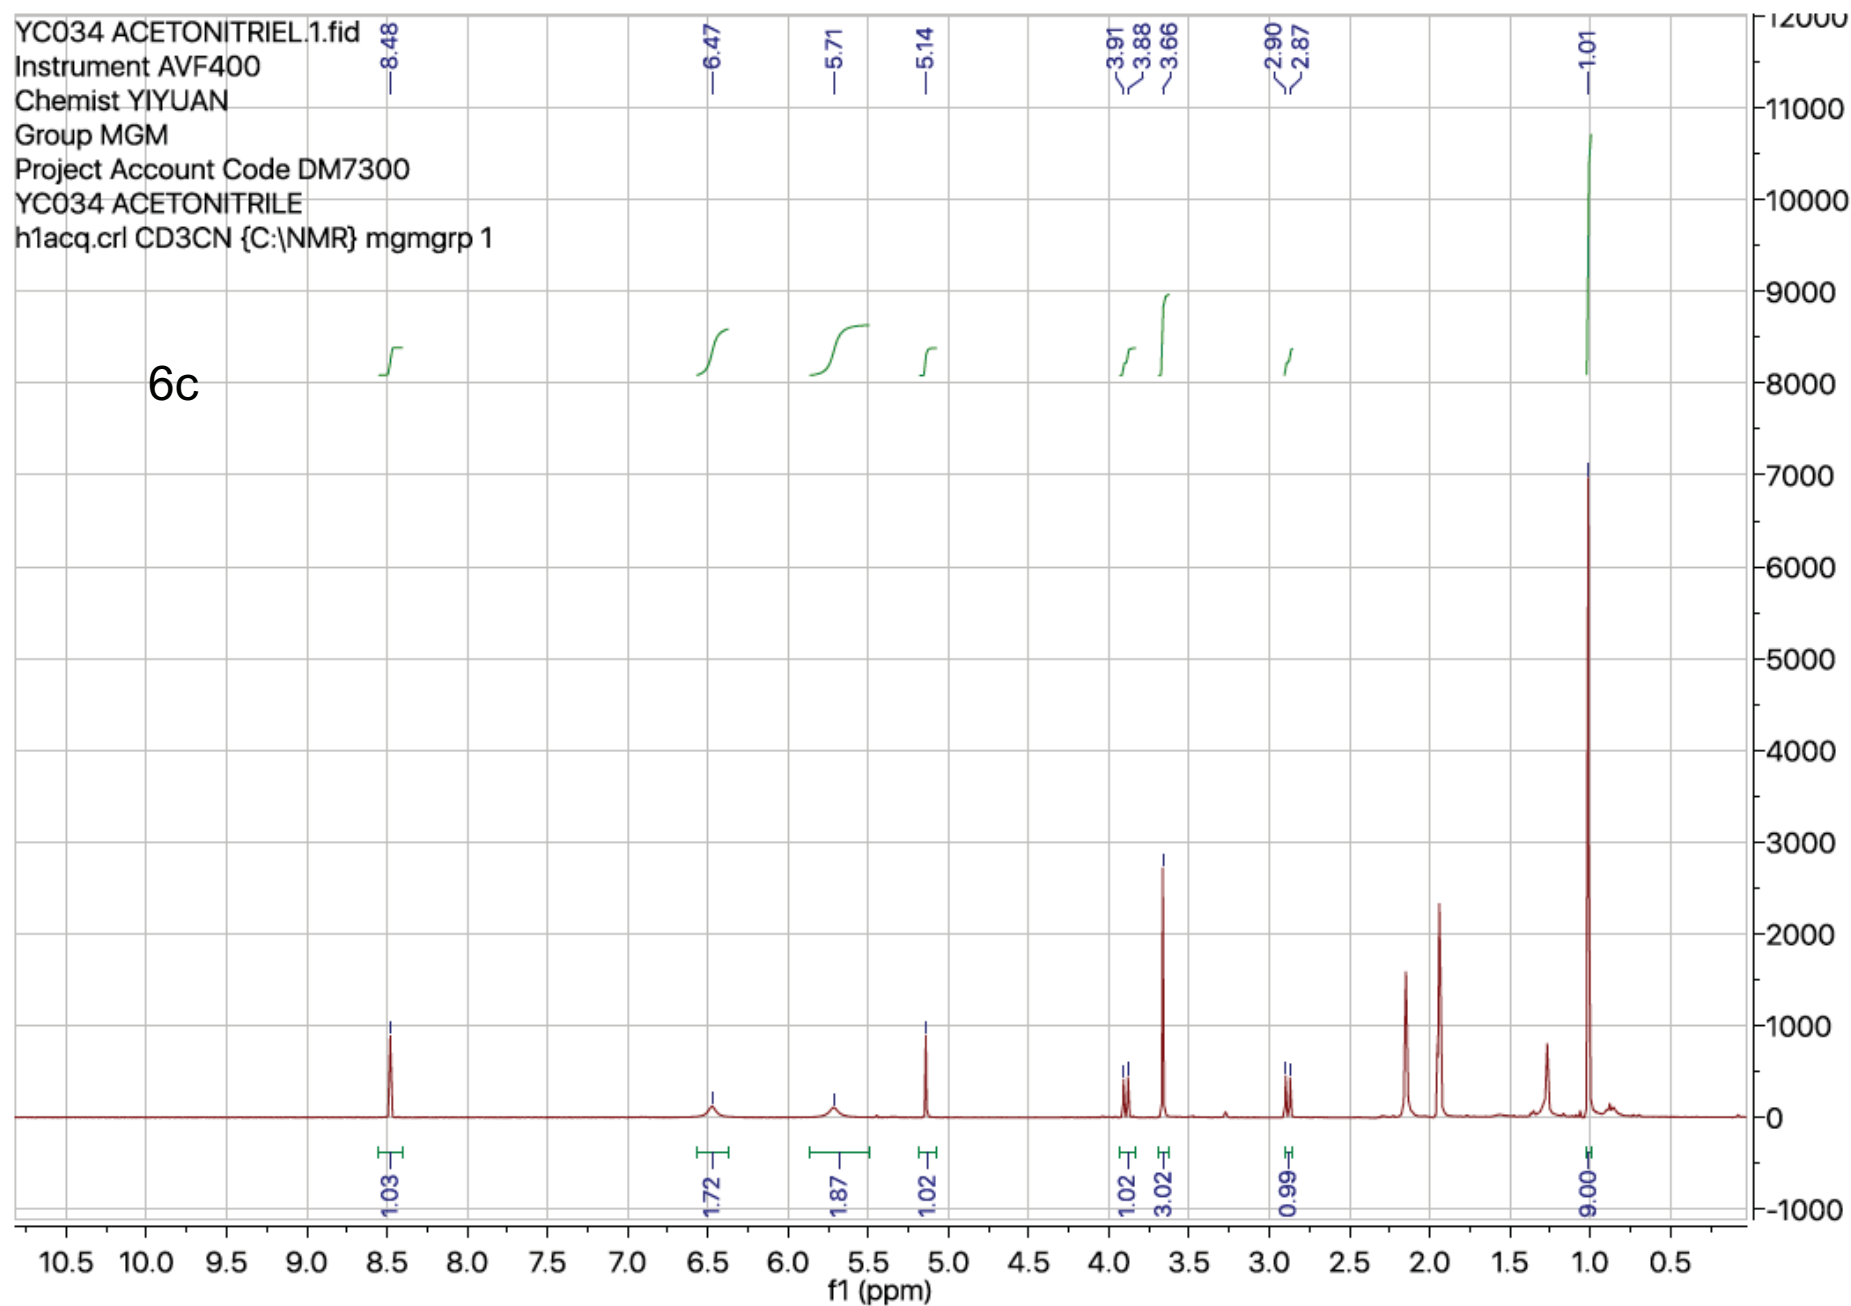

YC045 CHAR.1.fid  
Instrument AVF400  
Chemist YIYUAN  
Group MGM  
Project Account Code DM7300  
YC045 CHAR  
h1acq.crl CDCl3 {C:\NMR} mgmgrp 1

7

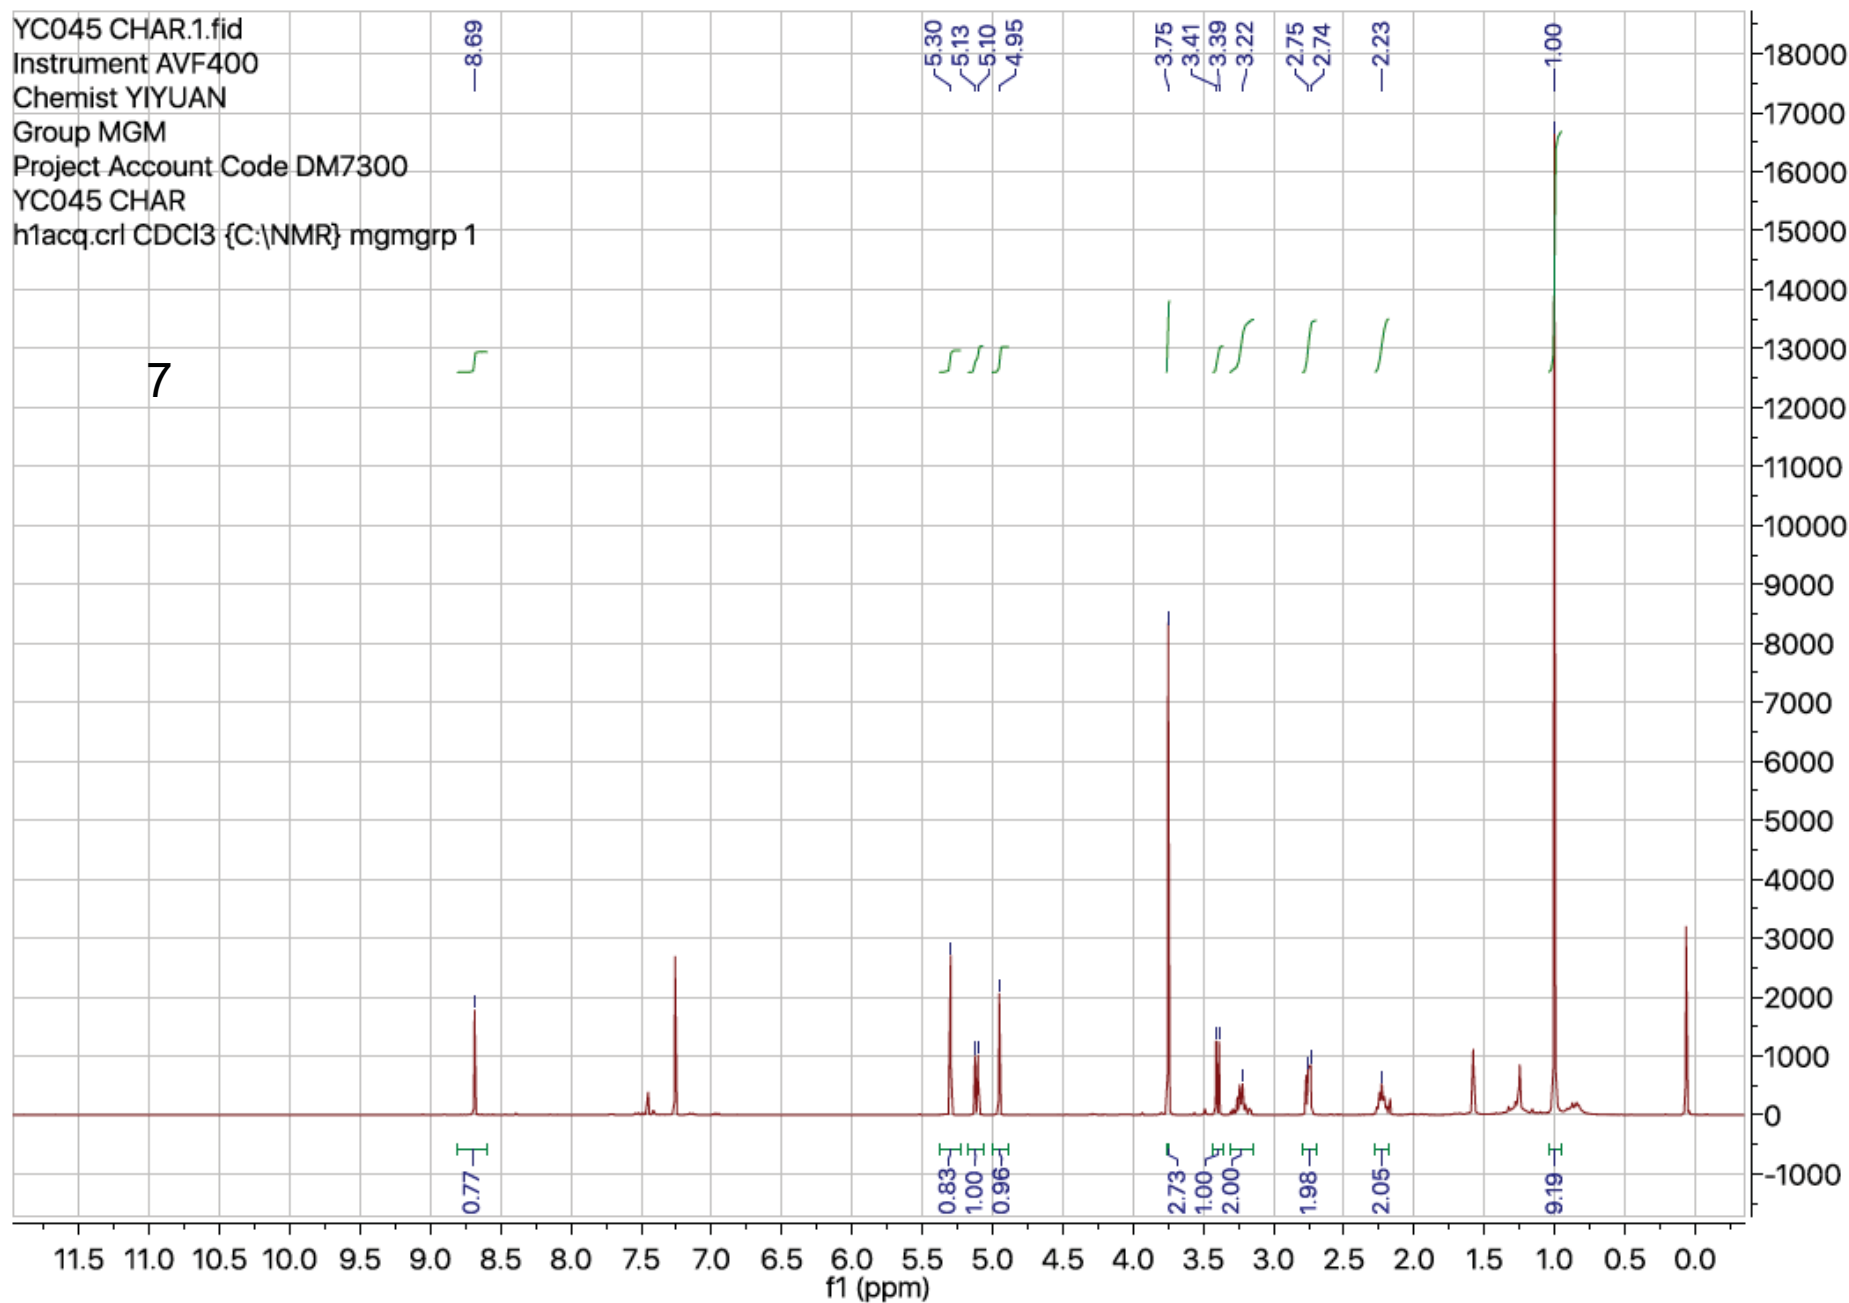

YC045 CHAR.4.fid  
Instrument AVF400  
Chemist YIYUAN  
Group MGM  
Project Account Code DM7300  
YC045 CHAR  
c13acq.crl CDC13 {C:\NMR} mgmgrp 1

7

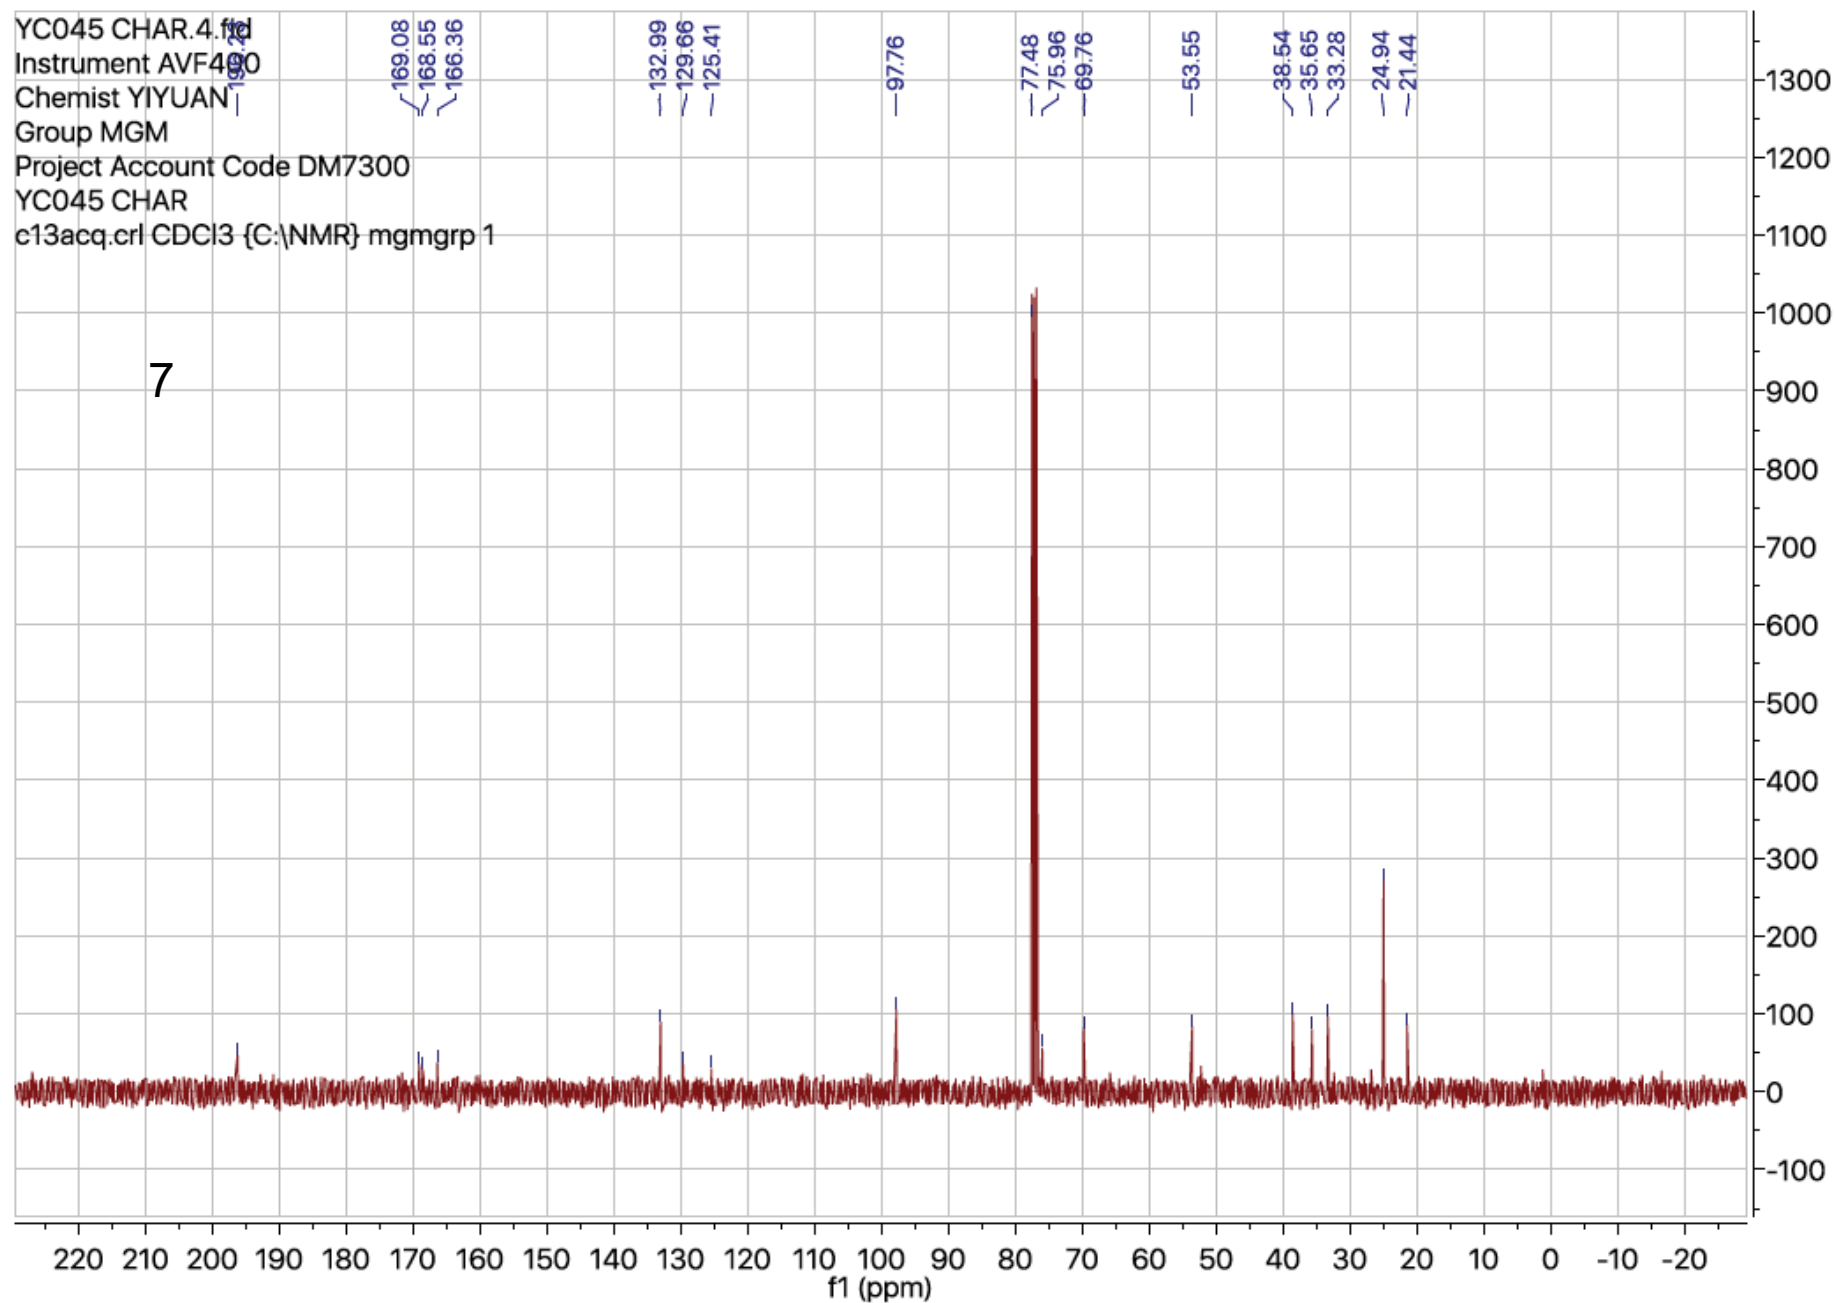

YC015 PRODUCT.2.fid  
Instrument AVG400  
Group MGM  
Chemist YIYUAN CHEN  
Project Account Code DM7300  
YC015 PRODUCT  
h1acq.crl CDCl3 {C:\NMR} mgmgrp 42

9a

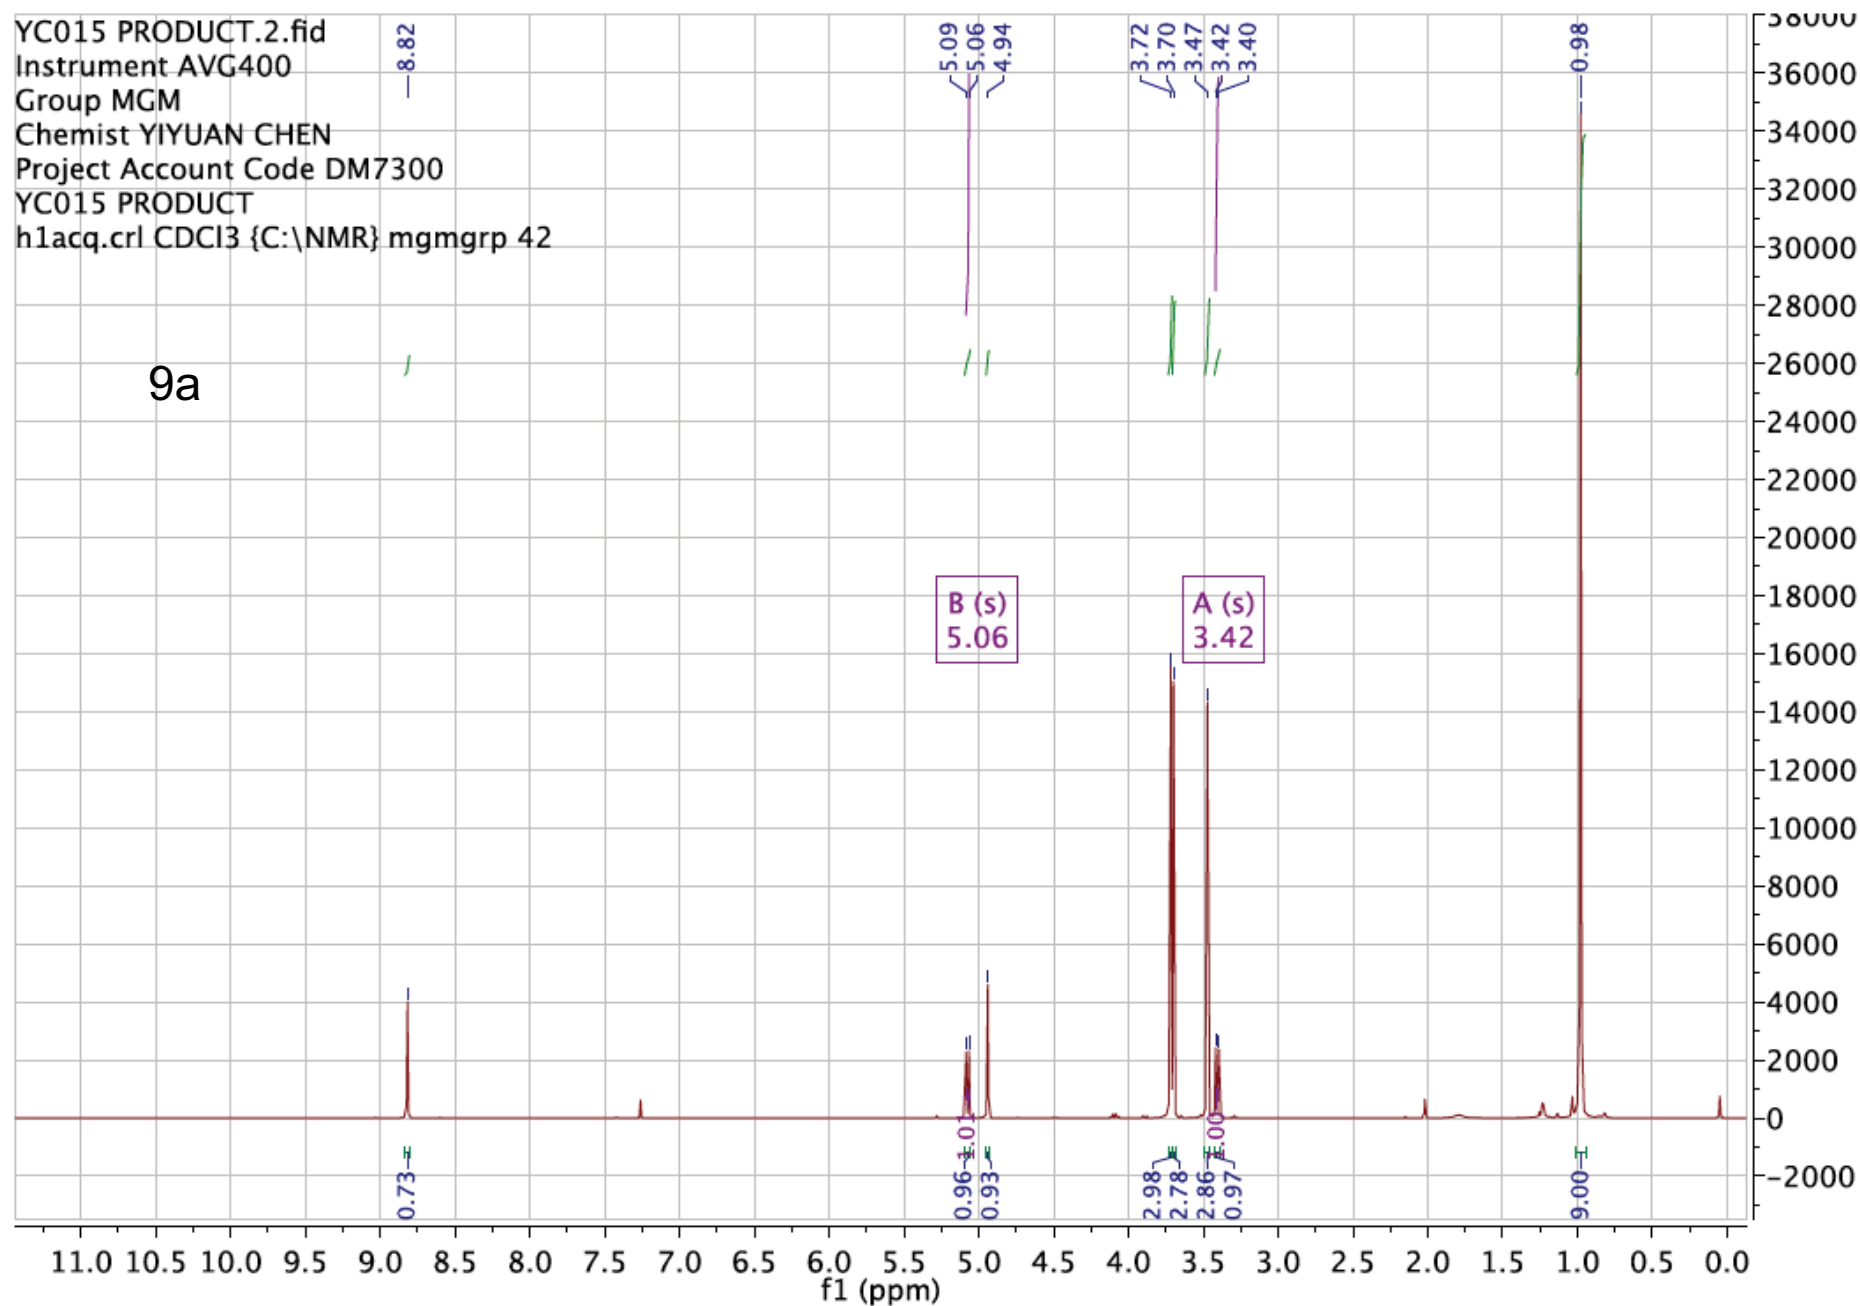

YC015 PRODUCT.3.fid  
Instrument AVG400  
Group MGM  
Chemist YIYUAN CHEN  
Project Account Code DM7300  
YC015 PRODUCT  
c13acq.crl CDCl3 {C:\NMR} mgmgrp 42

9a

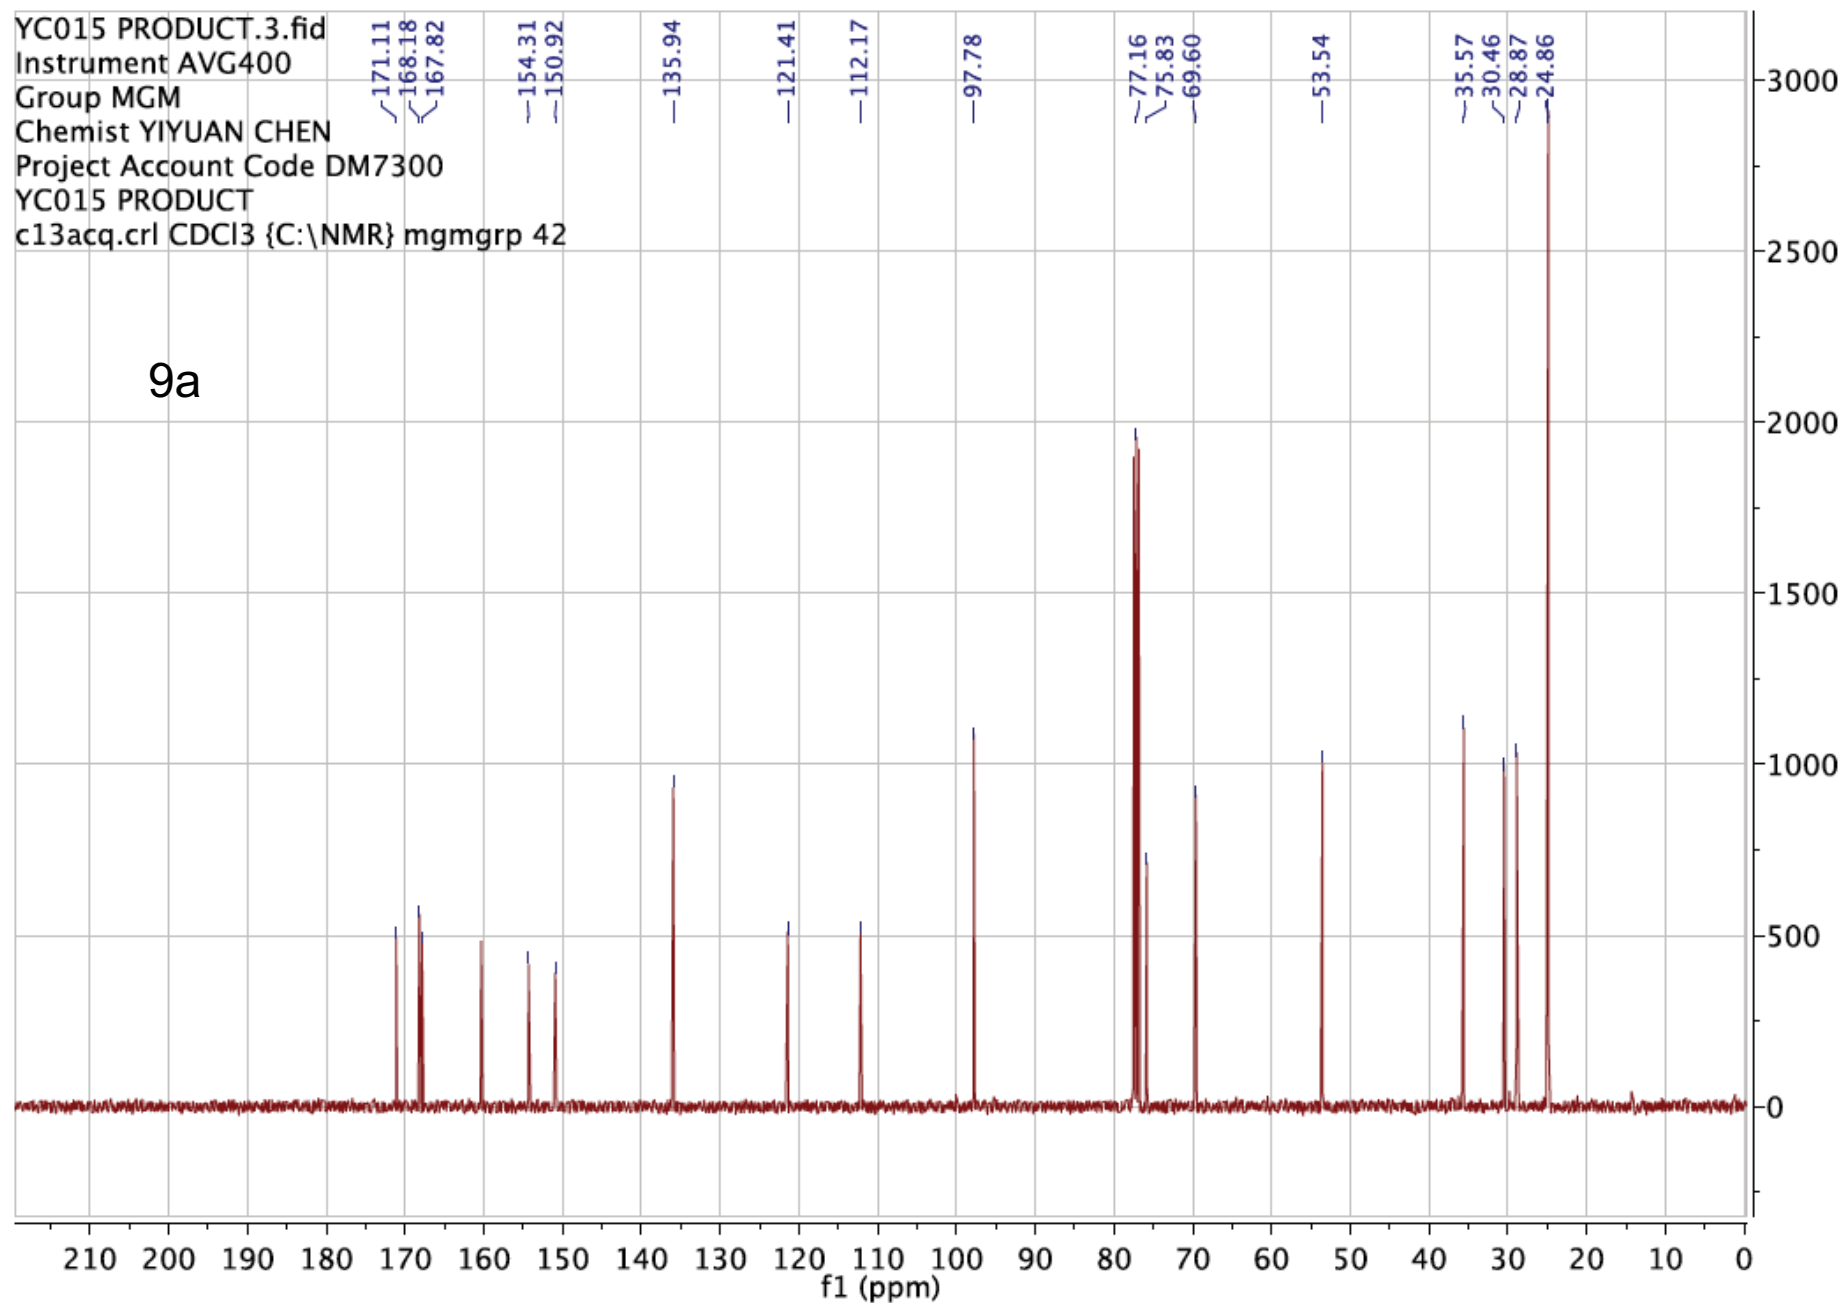



9a

yc29432910.2.ser

Instrument AVC500

Group MGM

Project Account Code P2

2943 Yiyuan Chen 29/10/15

Please use the most recent version of the sample submission form. Thanks.

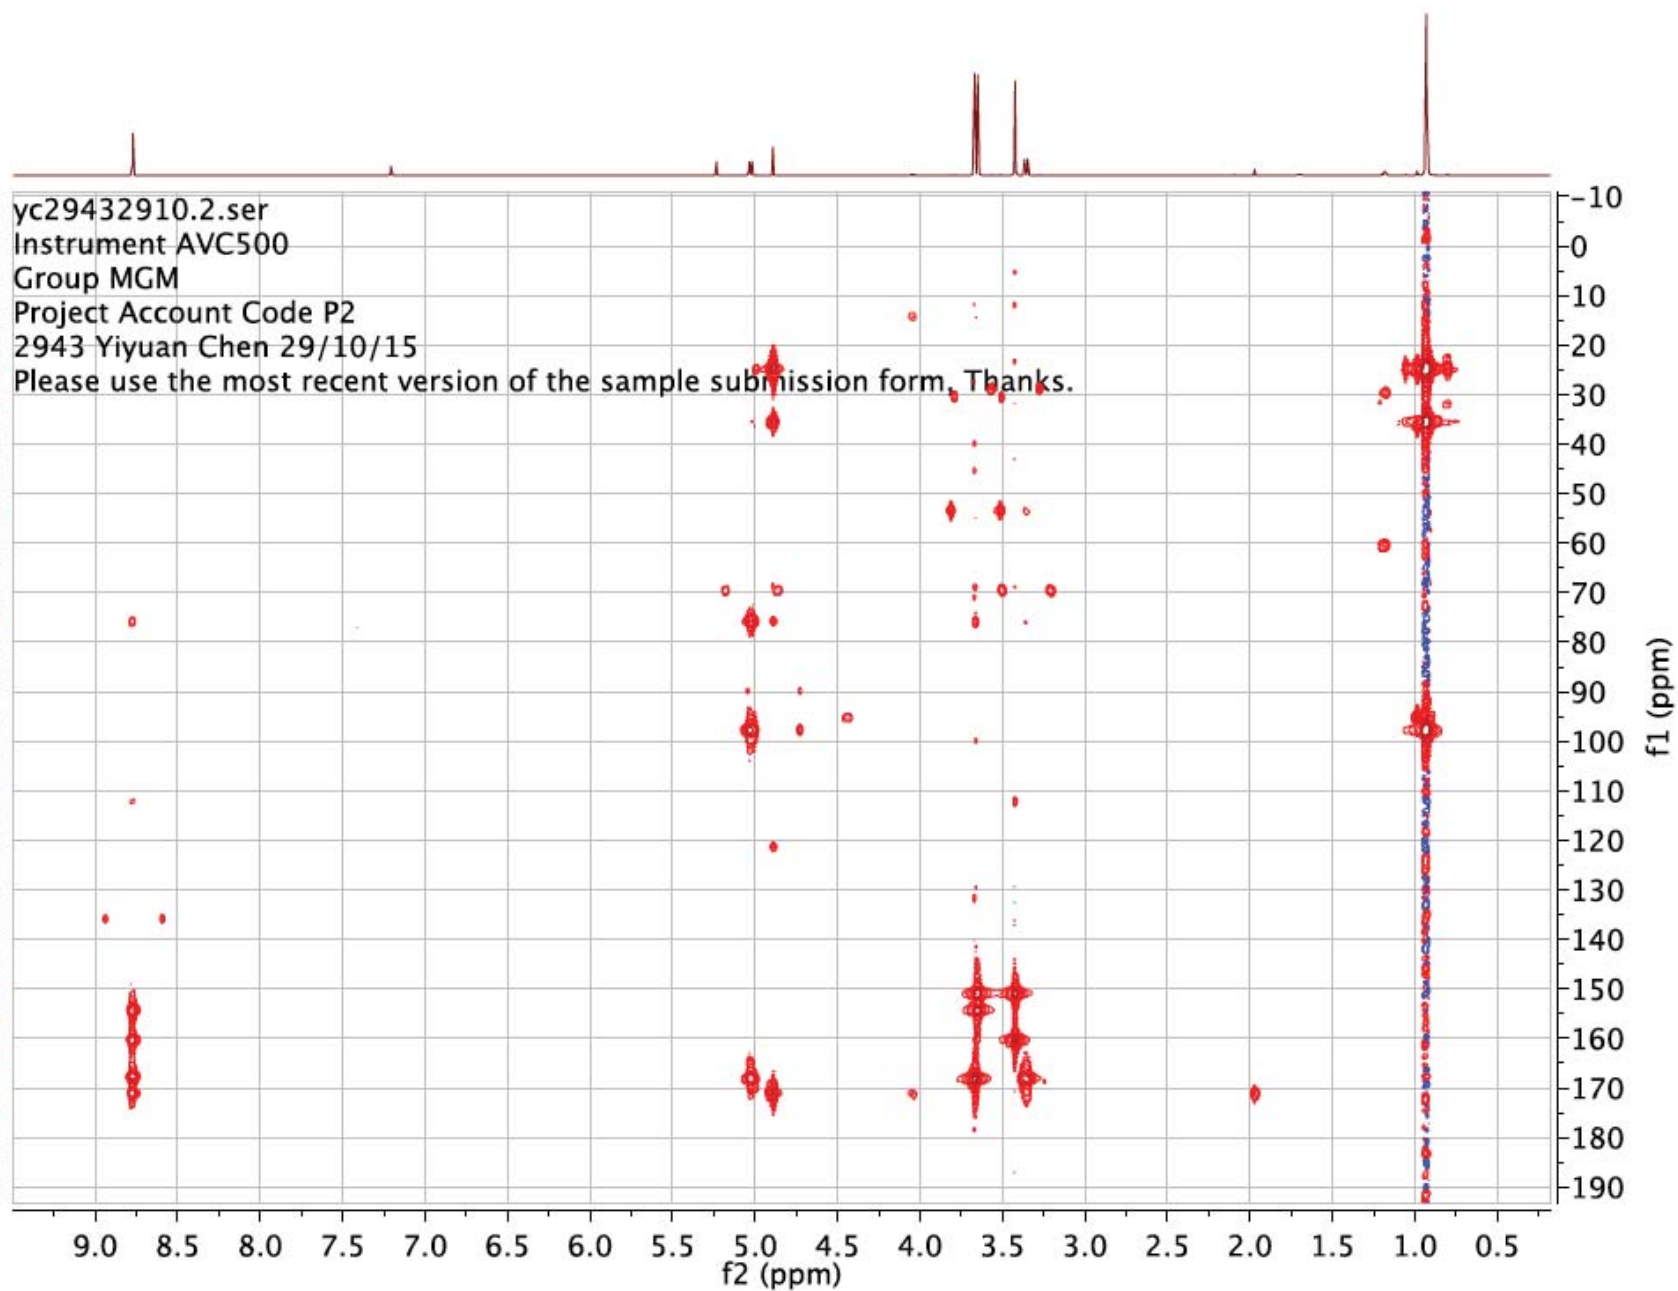

Instrument AVF400  
Chemist YIYUAN  
Group MGM  
Project Account Code DM7300  
YC070 MeOD  
h1acq.crl MeOD {C:\NMR} mqmqrp 5

NMR@CHEM.OX

9b

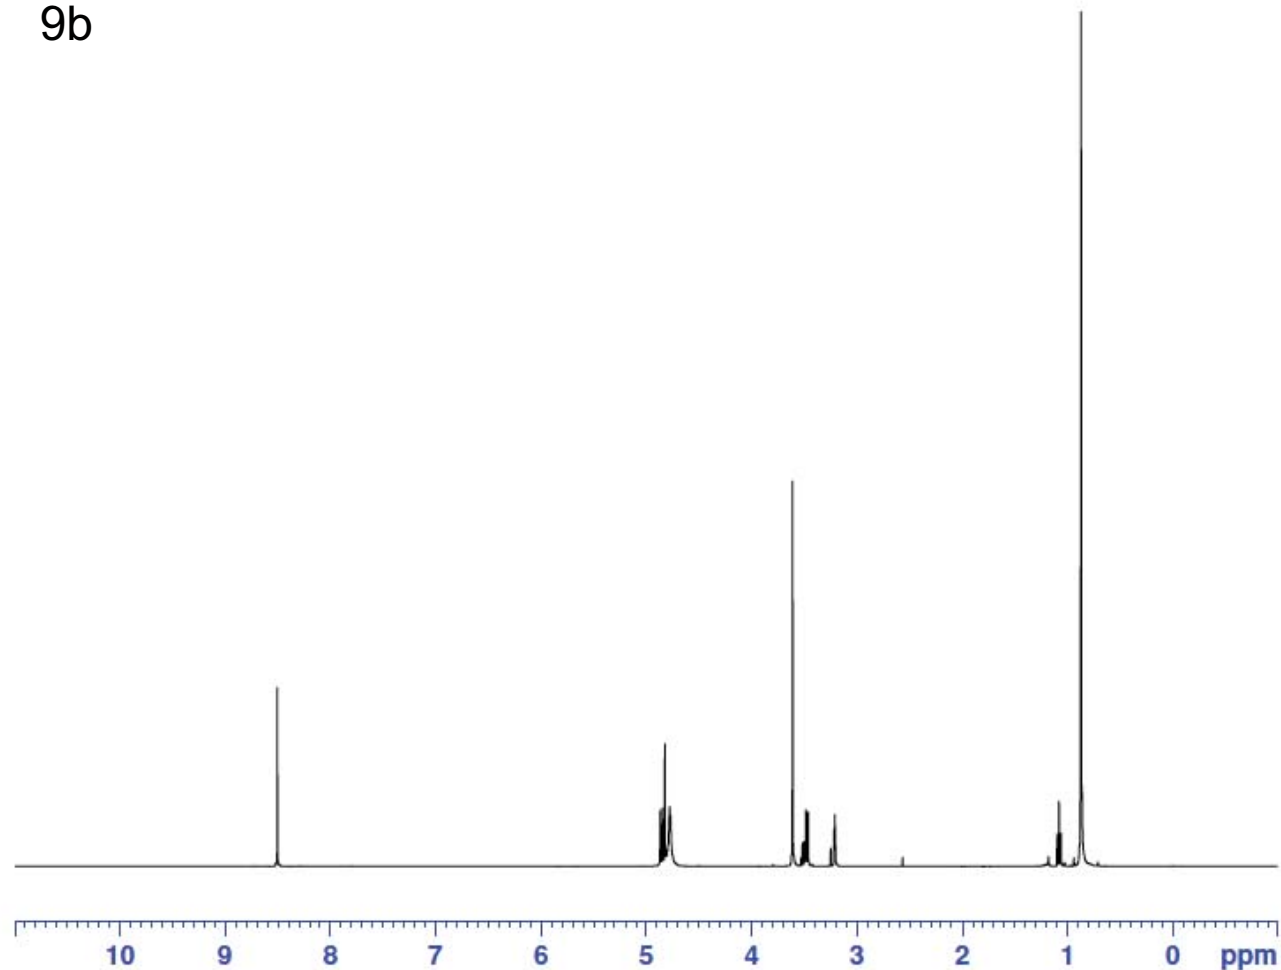

Current Data Parameters  
NAME YC070 MeOD  
EXPNO 1  
PROCNO 1

F2 - Acquisition Parameters  
Date\_ 20160423  
Time 12.15 h  
INSTRUM avf400  
PROBHD Z108618\_0533 (  
PULPROG zg60  
TD 65536  
SOLVENT MeOD  
NS 16  
DS 2  
SWH 8012.820 Hz  
FIDRES 0.244532 Hz  
AQ 4.0894465 sec  
RG 65.71  
DW 62.400 usec  
DE 6.50 usec  
TE 295.0 K  
D1 1.00000000 sec  
TD0 1  
SFO1 400.2524015 MHz  
NUC1 1H  
P1 19.50 usec  
PLW1 16.70000076 W

F2 - Processing parameters  
SI 32768  
SF 400.2500484 MHz  
WDW EM  
SSB 0  
LB 0.30 Hz  
GB 0  
PC 1.00

Instrument AVF400  
 Chemist YIYUAN  
 Group MGM  
 Project Account Code DM7300  
 YC070 MeOD  
 c13acq.crl MeOD {C:\NMR} mnmrqp 5

NMR@CHEM.OX

9b

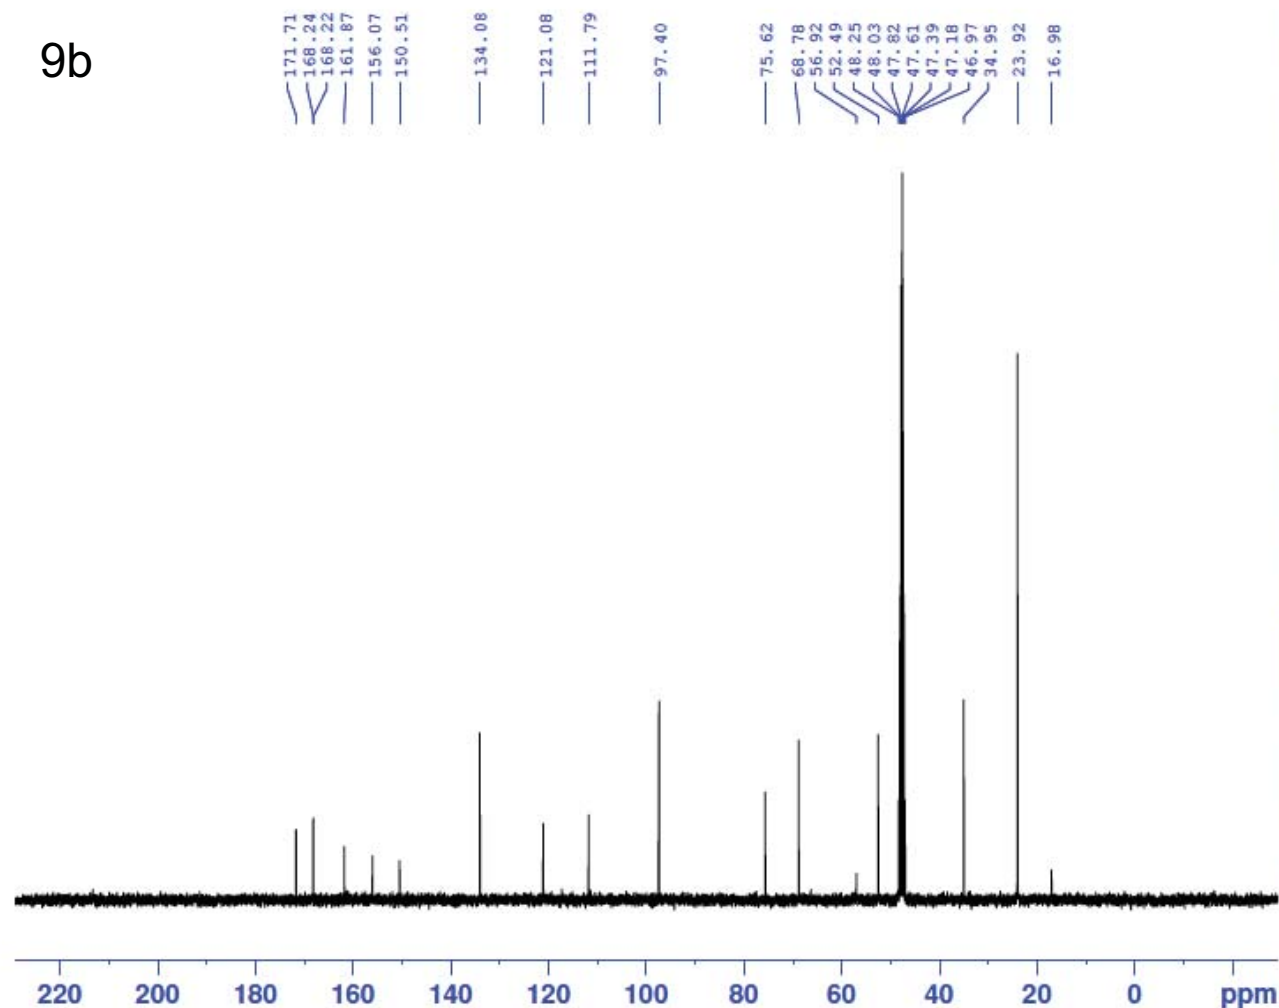

Current Data Parameters  
 NAME YC070 MeOD  
 EXPNO 4  
 PROCNO 1

F2 - Acquisition Parameters  
 Date\_ 20160423  
 Time 12.39 h  
 INSTRUM avf400  
 PROBHD Z108618\_0533 (  
 PULPROG zgpg30  
 TD 32768  
 SOLVENT MeOD  
 NS 256  
 DS 4  
 SWH 26041.666 Hz  
 FIDRES 1.589457 Hz  
 AQ 0.6291456 sec  
 RG 205.43  
 DW 19.200 usec  
 DE 6.50 usec  
 TE 295.7 K  
 D1 1.00000000 sec  
 D11 0.03000000 sec  
 TD0 1  
 SFO1 100.6530068 MHz  
 NUC1 13C  
 P1 9.00 usec  
 PLW1 58.70000076 W  
 SFO2 400.2516010 MHz  
 NUC2 1H  
 CPDPRG[2] waltz16  
 PCPD2 90.00 usec  
 PLW2 16.70000076 W  
 PLW12 0.78397000 W  
 PLW13 0.39432999 W

F2 - Processing parameters  
 SI 32768  
 SF 100.6429430 MHz  
 WDW EM  
 SSB 0  
 LB 1.00 Hz  
 GB 0  
 PC 1.40

yc48622705.1.fid  
Instrument AVC500  
Group MGM  
Project Account Code P2  
4862 Yiyuan Chen 27/5/16

9c

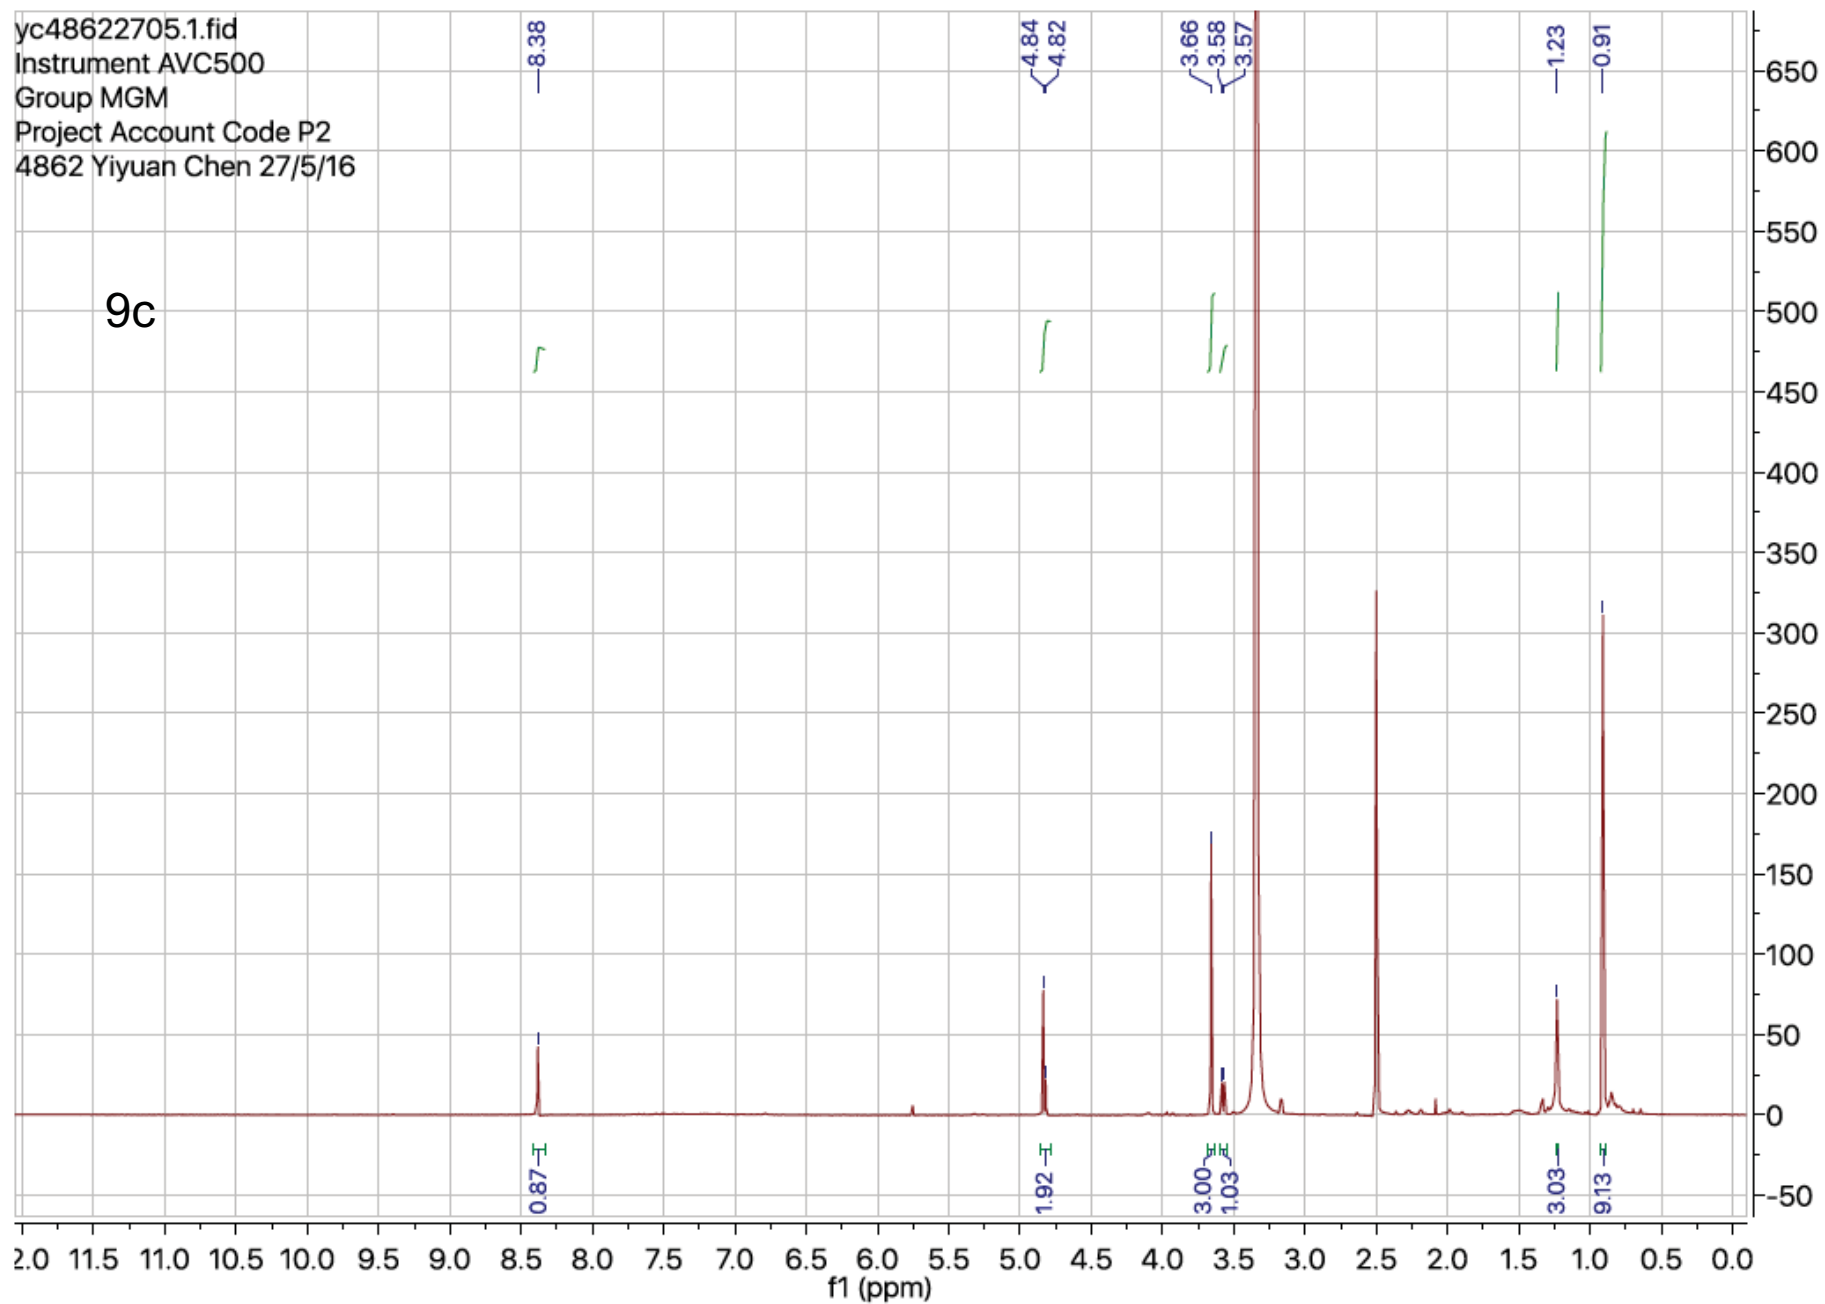

yc48622705.4.fid  
Instrument AVC500  
Group MGM  
Project Account Code P2  
4862 Yiyuan Chen 27/5/16

9c

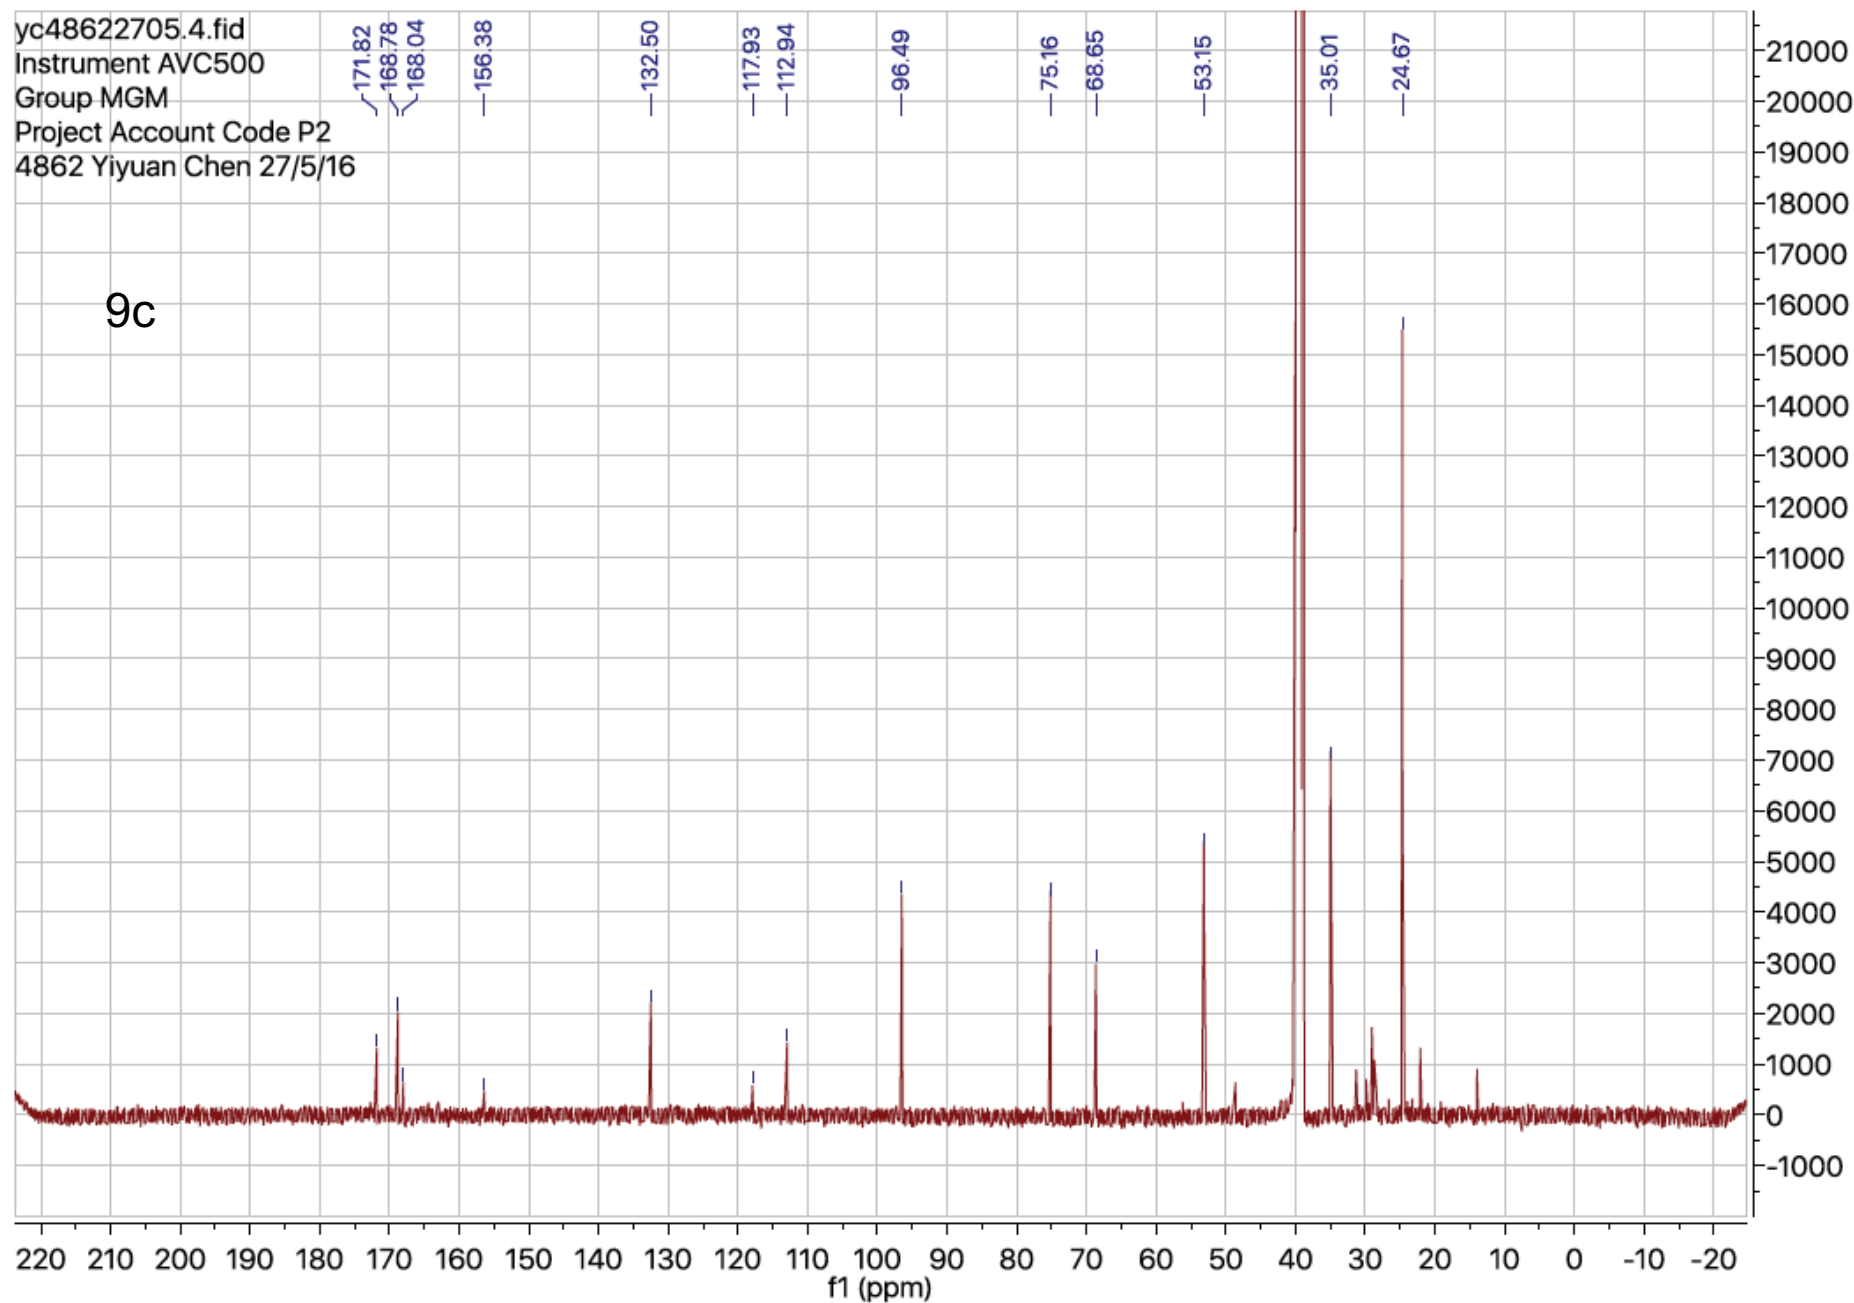

9c

yc48622705.5.ser  
Instrument AVC500  
Group MGM  
Project Account Code P2  
4862 Yiyuan Chen 27/5/16

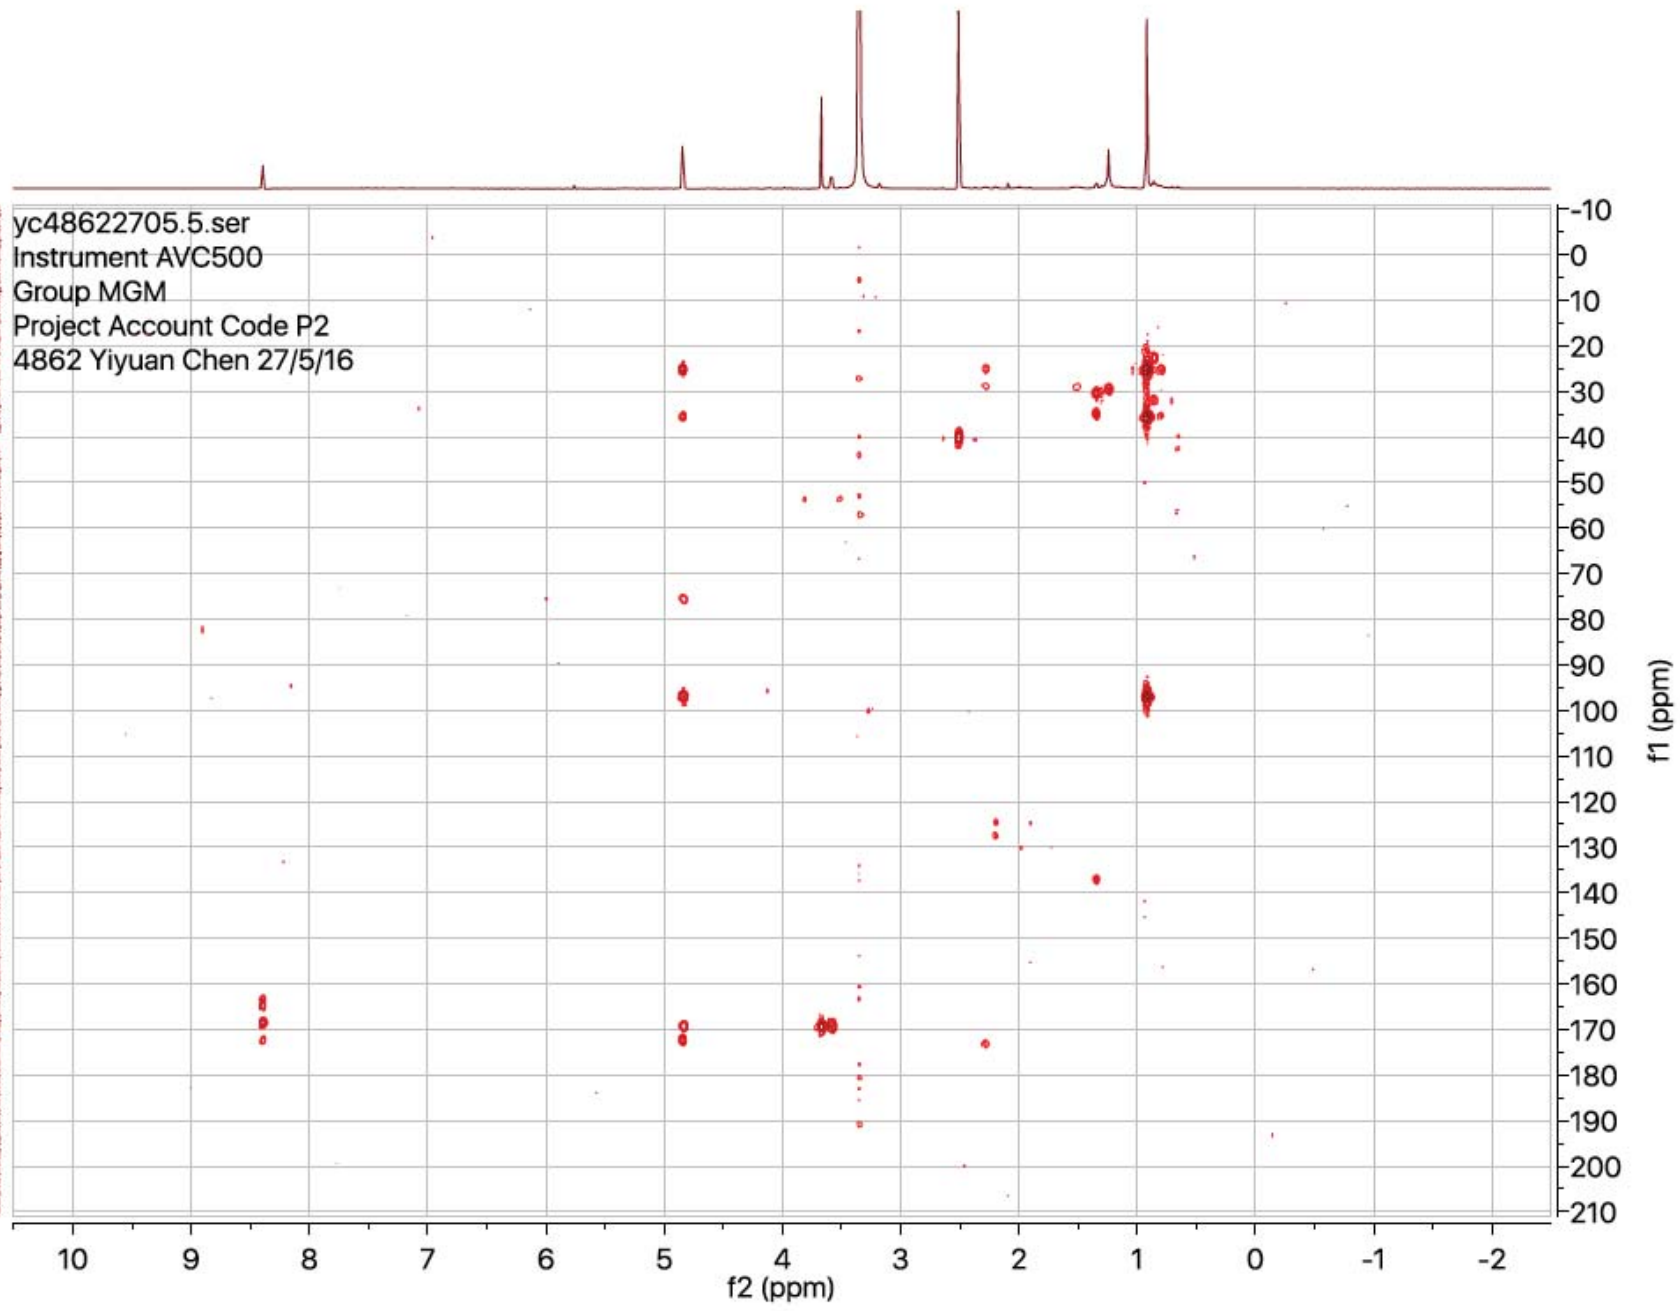

Instrument AVF400  
Chemist YIYUAN  
Group MGM  
Project Account Code DM7300  
YC071 AFTER COLUMN  
h1acq.crl MeOD {C:\NMR} mqmqrp 1

NMR@CHEM.OX

9d

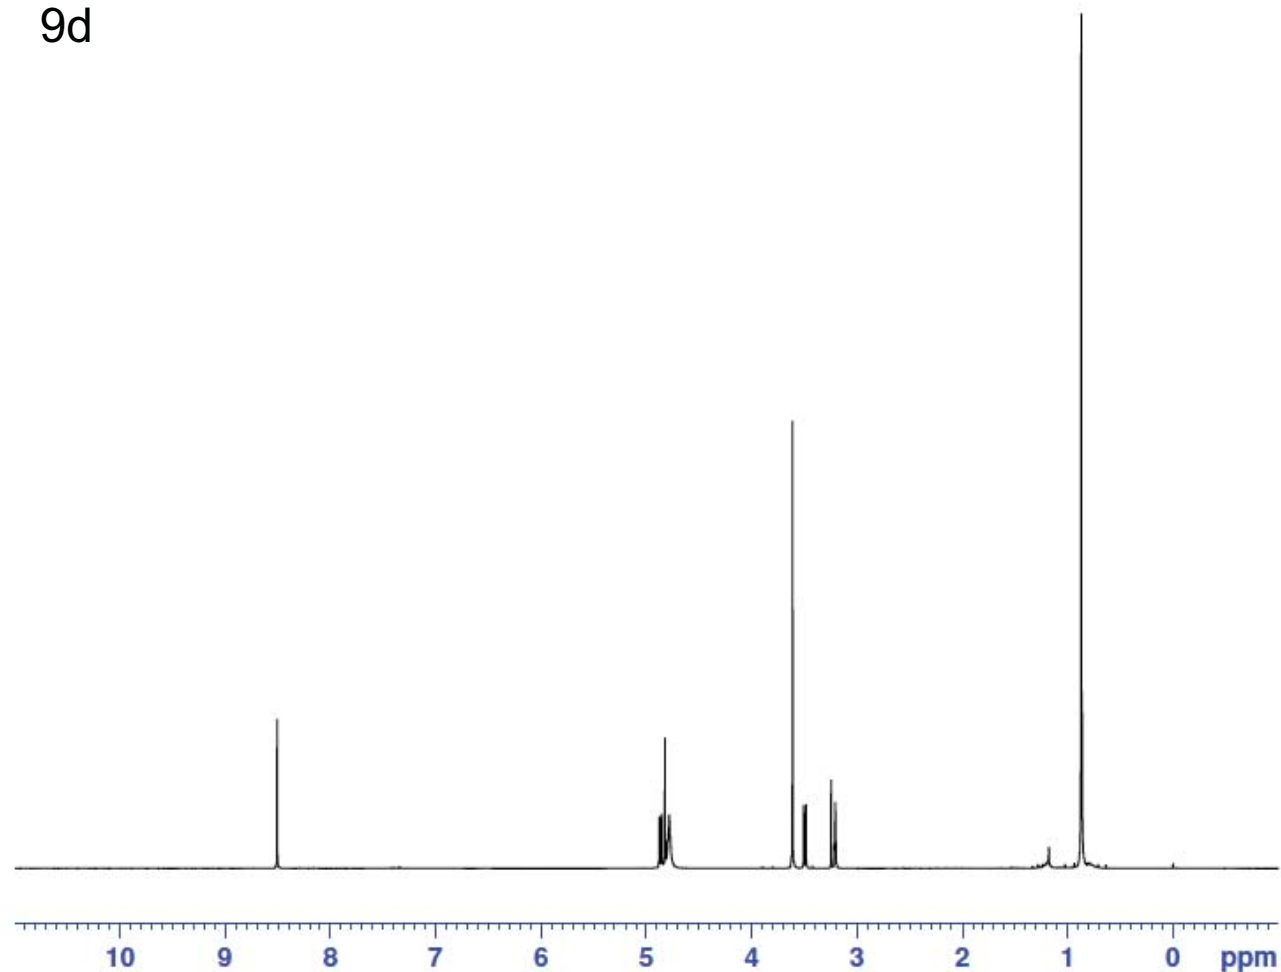

Current Data Parameters  
NAME YC071 Column  
EXPNO 1  
PROCNO 1

F2 - Acquisition Parameters  
Date\_ 20160503  
Time 12.27 h  
INSTRUM avf400  
PROBHD Z108618\_0533 (  
PULPROG zg60  
TD 65536  
SOLVENT MeOD  
NS 16  
DS 2  
SWH 8012.820 Hz  
FIDRES 0.244532 Hz  
AQ 4.0894465 sec  
RG 65.71  
DW 62.400 usec  
DE 6.50 usec  
TE 294.4 K  
D1 1.00000000 sec  
TD0 1  
SFO1 400.2524015 MHz  
NUC1 1H  
P1 19.50 usec  
PLW1 16.70000076 W

F2 - Processing parameters  
SI 32768  
SF 400.2500482 MHz  
WDW EM  
SSB 0  
LB 0.30 Hz  
GB 0  
PC 1.00



Instrument AVF400  
 Chemist YIYUAN  
 Group MGM  
 Project Account Code DM7300  
 YC071 AFTER COLUMN  
 c13acq.crl MeOD {C:\NMR} mqmqrp 1

NMR@CHEM.OX

9d

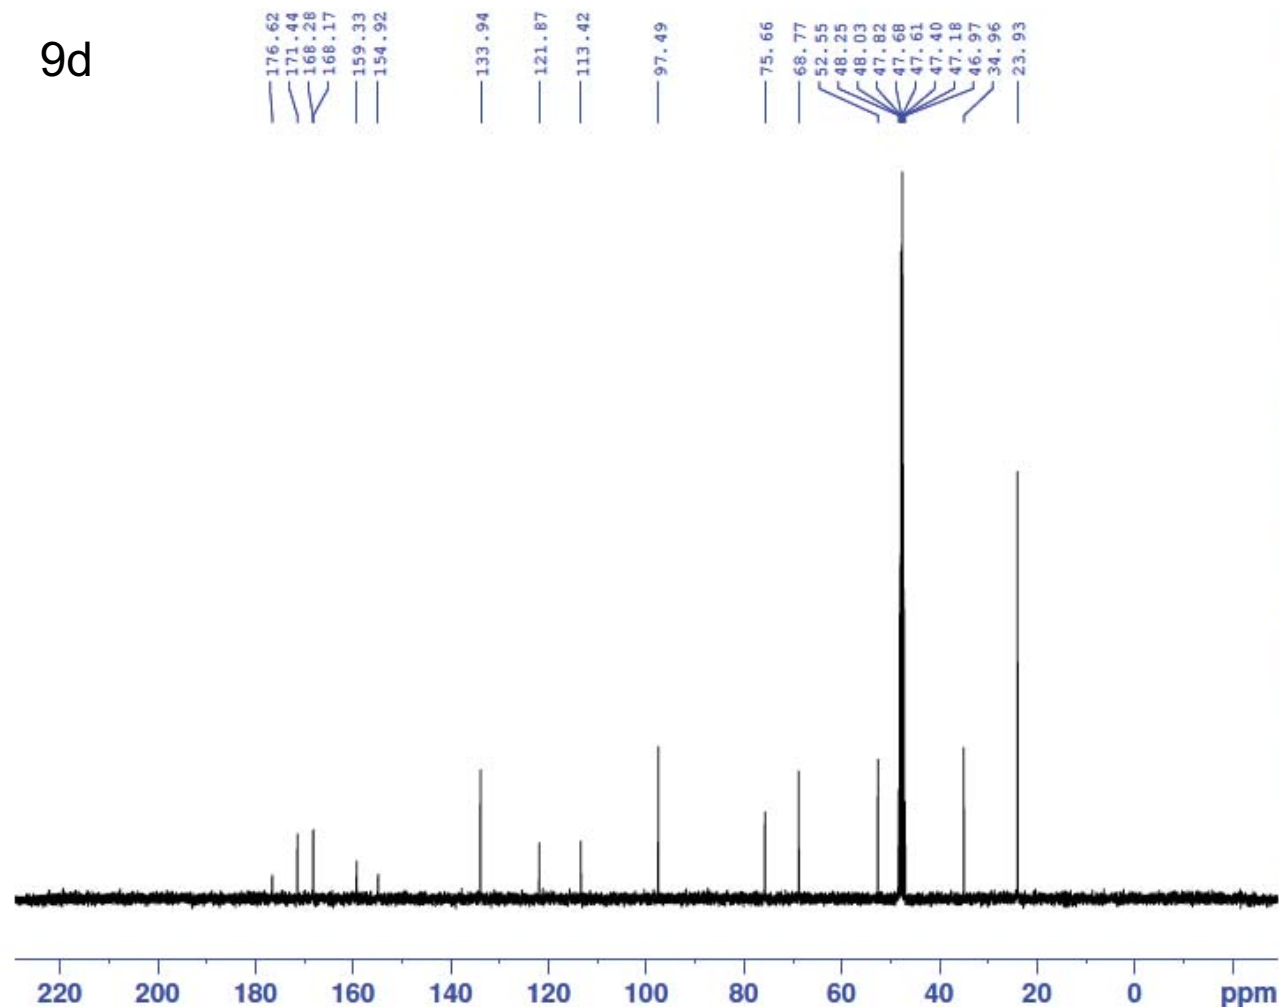

Current Data Parameters  
 NAME YC071 Column  
 EXPNO 4  
 PROCNO 1

F2 - Acquisition Parameters  
 Date\_ 20160503  
 Time 12.51 h  
 INSTRUM avf400  
 PROBHD Z108618\_0533 (   
 PULPROG zgpg30  
 TD 32768  
 SOLVENT MeOD  
 NS 256  
 DS 4  
 SWH 26041.666 Hz  
 FIDRES 1.589457 Hz  
 AQ 0.6291456 sec  
 RG 205.43  
 DW 19.200 usec  
 DE 6.50 usec  
 TE 295.1 K  
 D1 1.00000000 sec  
 D11 0.03000000 sec  
 TD0 1  
 SFO1 100.6530068 MHz  
 NUC1 13C  
 P1 9.00 usec  
 PLW1 58.70000076 W  
 SFO2 400.2516010 MHz  
 NUC2 1H  
 CPDPRG[2] waltz16  
 PCPD2 90.00 usec  
 PLW2 16.70000076 W  
 PLW12 0.78397000 W  
 PLW13 0.39432999 W

F2 - Processing parameters  
 SI 32768  
 SF 100.6429430 MHz  
 WDW EM  
 SSB 0  
 LB 1.00 Hz  
 GB 0  
 PC 1.40



Instrument AVF400  
Chemist YIYUAN CHEN  
Group MGM  
Project Account Code DM7300  
YC030 CHARACT CDC13  
h1acq.crl CDC13 {C:\NMR} mnmqrp 30

NMR@CHEM.OX

9e

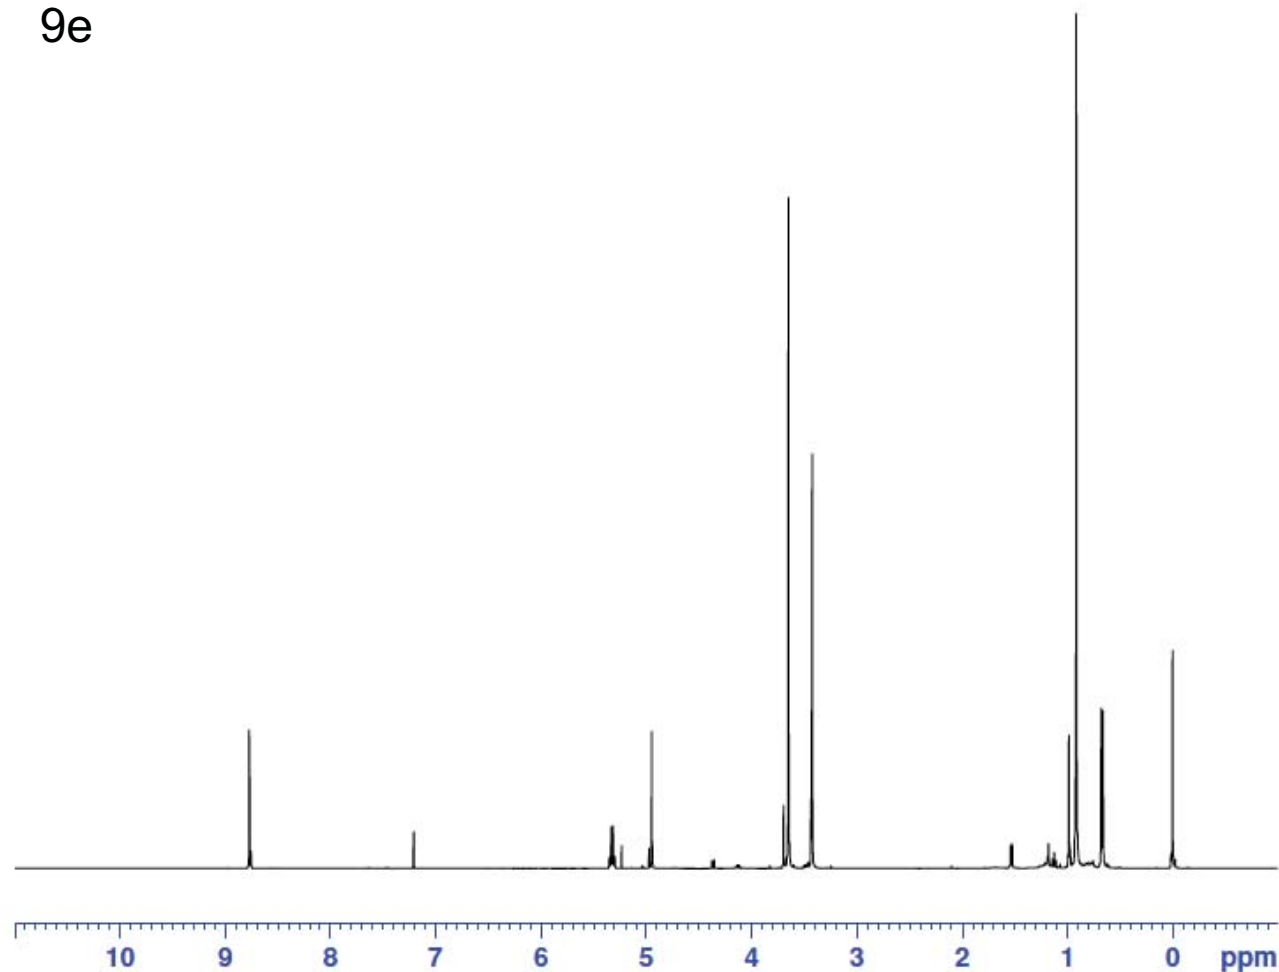

Current Data Parameters  
NAME YC030 CHAR  
EXPNO 1  
PROCNO 1

F2 - Acquisition Parameters  
Date\_ 20160505  
Time 7.04 h  
INSTRUM avf400  
PROBHD Z108618\_0533 (  
PULPROG zg60  
TD 65536  
SOLVENT CDC13  
NS 16  
DS 2  
SWH 8012.820 Hz  
FIDRES 0.244532 Hz  
AQ 4.0894465 sec  
RG 39.49  
DW 62.400 usec  
DE 6.50 usec  
TE 294.9 K  
D1 1.00000000 sec  
TD0 1  
SFO1 400.2524015 MHz  
NUC1 1H  
P1 19.50 usec  
PLW1 16.70000076 W

F2 - Processing parameters  
SI 32768  
SF 400.2500300 MHz  
WDW EM  
SSB 0  
LB 0.30 Hz  
GB 0  
PC 1.00

Instrument AVF400  
 Chemist YIYUAN CHEN  
 Group MGM  
 Project Account Code DM7300  
 YC030 CHARACT CDC13  
 c13acq.crl CDC13 (C:NMR) mmmqr 30

NMR@CHEM.OX

9e

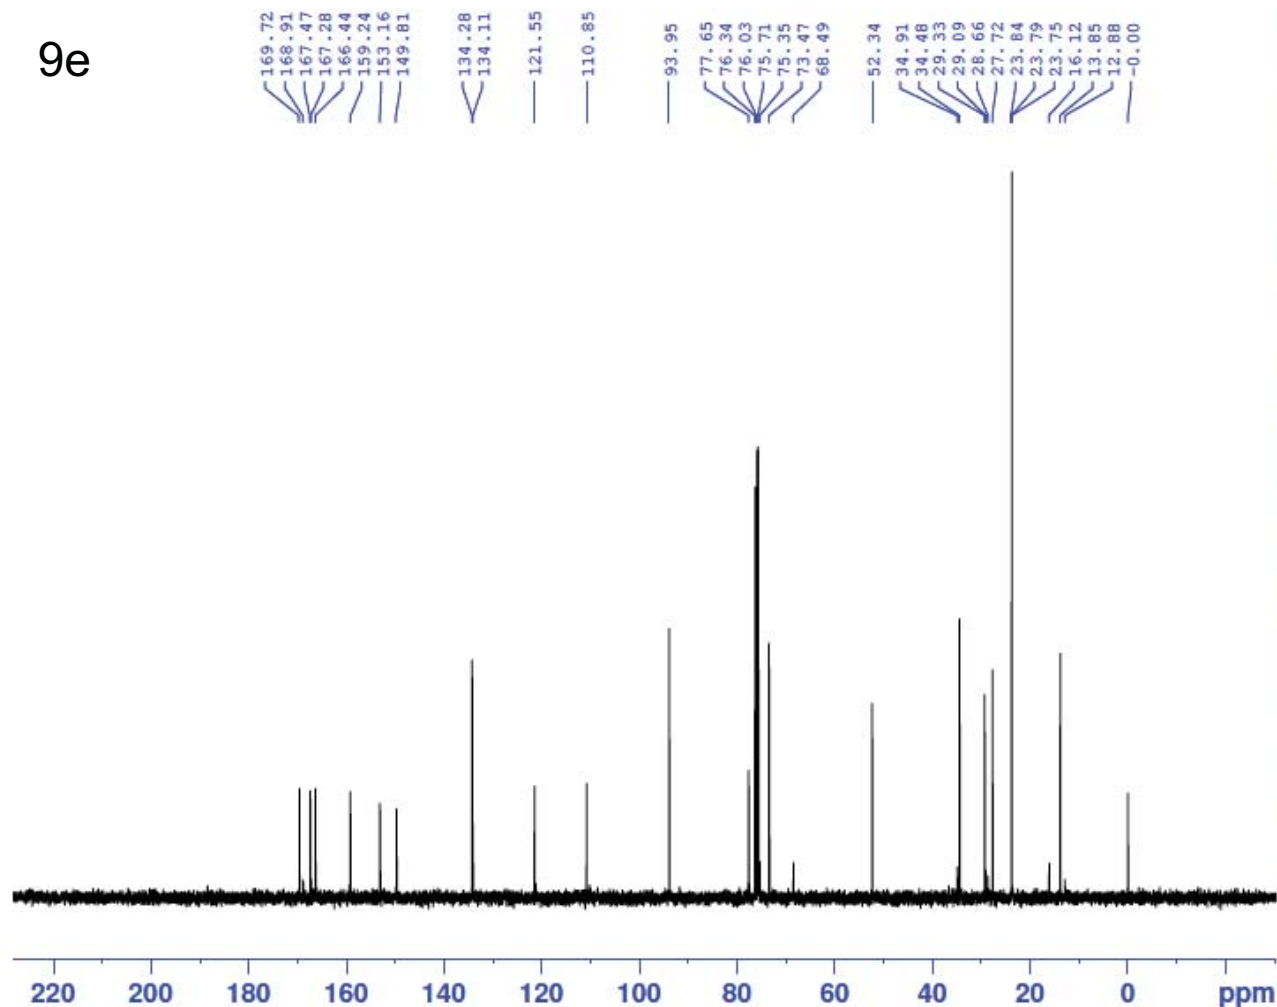

Current Data Parameters  
 NAME YC030 CHAR  
 EXPNO 4  
 PROCNO 1

F2 - Acquisition Parameters  
 Date\_ 20160505  
 Time 7.27 h  
 INSTRUM avf400  
 PROBHD Z108618\_0533 ( )  
 PULPROG zgpg30  
 TD 32768  
 SOLVENT CDC13  
 NS 256  
 DS 4  
 SWH 26041.666 Hz  
 FIDRES 1.589457 Hz  
 AQ 0.6291456 sec  
 RG 205.43  
 DW 19.200 usec  
 DE 6.50 usec  
 TE 295.5 K  
 D1 1.00000000 sec  
 D11 0.03000000 sec  
 TD0 1  
 SFO1 100.6530068 MHz  
 NUC1 13C  
 P1 9.00 usec  
 PLW1 58.70000076 W  
 SFO2 400.2516010 MHz  
 NUC2 1H  
 CPDPRG[2] waltz16  
 PCPD2 90.00 usec  
 PLW2 16.70000076 W  
 PLW12 0.78397000 W  
 PLW13 0.39432999 W

F2 - Processing parameters  
 SI 32768  
 SF 100.6430464 MHz  
 WDW EM  
 SSB 0  
 LB 1.00 Hz  
 GB 0  
 PC 1.40

YC036 PO.1.fid  
Instrument DPX200  
Group MGM  
Project Account Code DM7300  
YC036 PO  
h1acq.au CDCl3 {C:\NMR} mgmgrp 1

9i

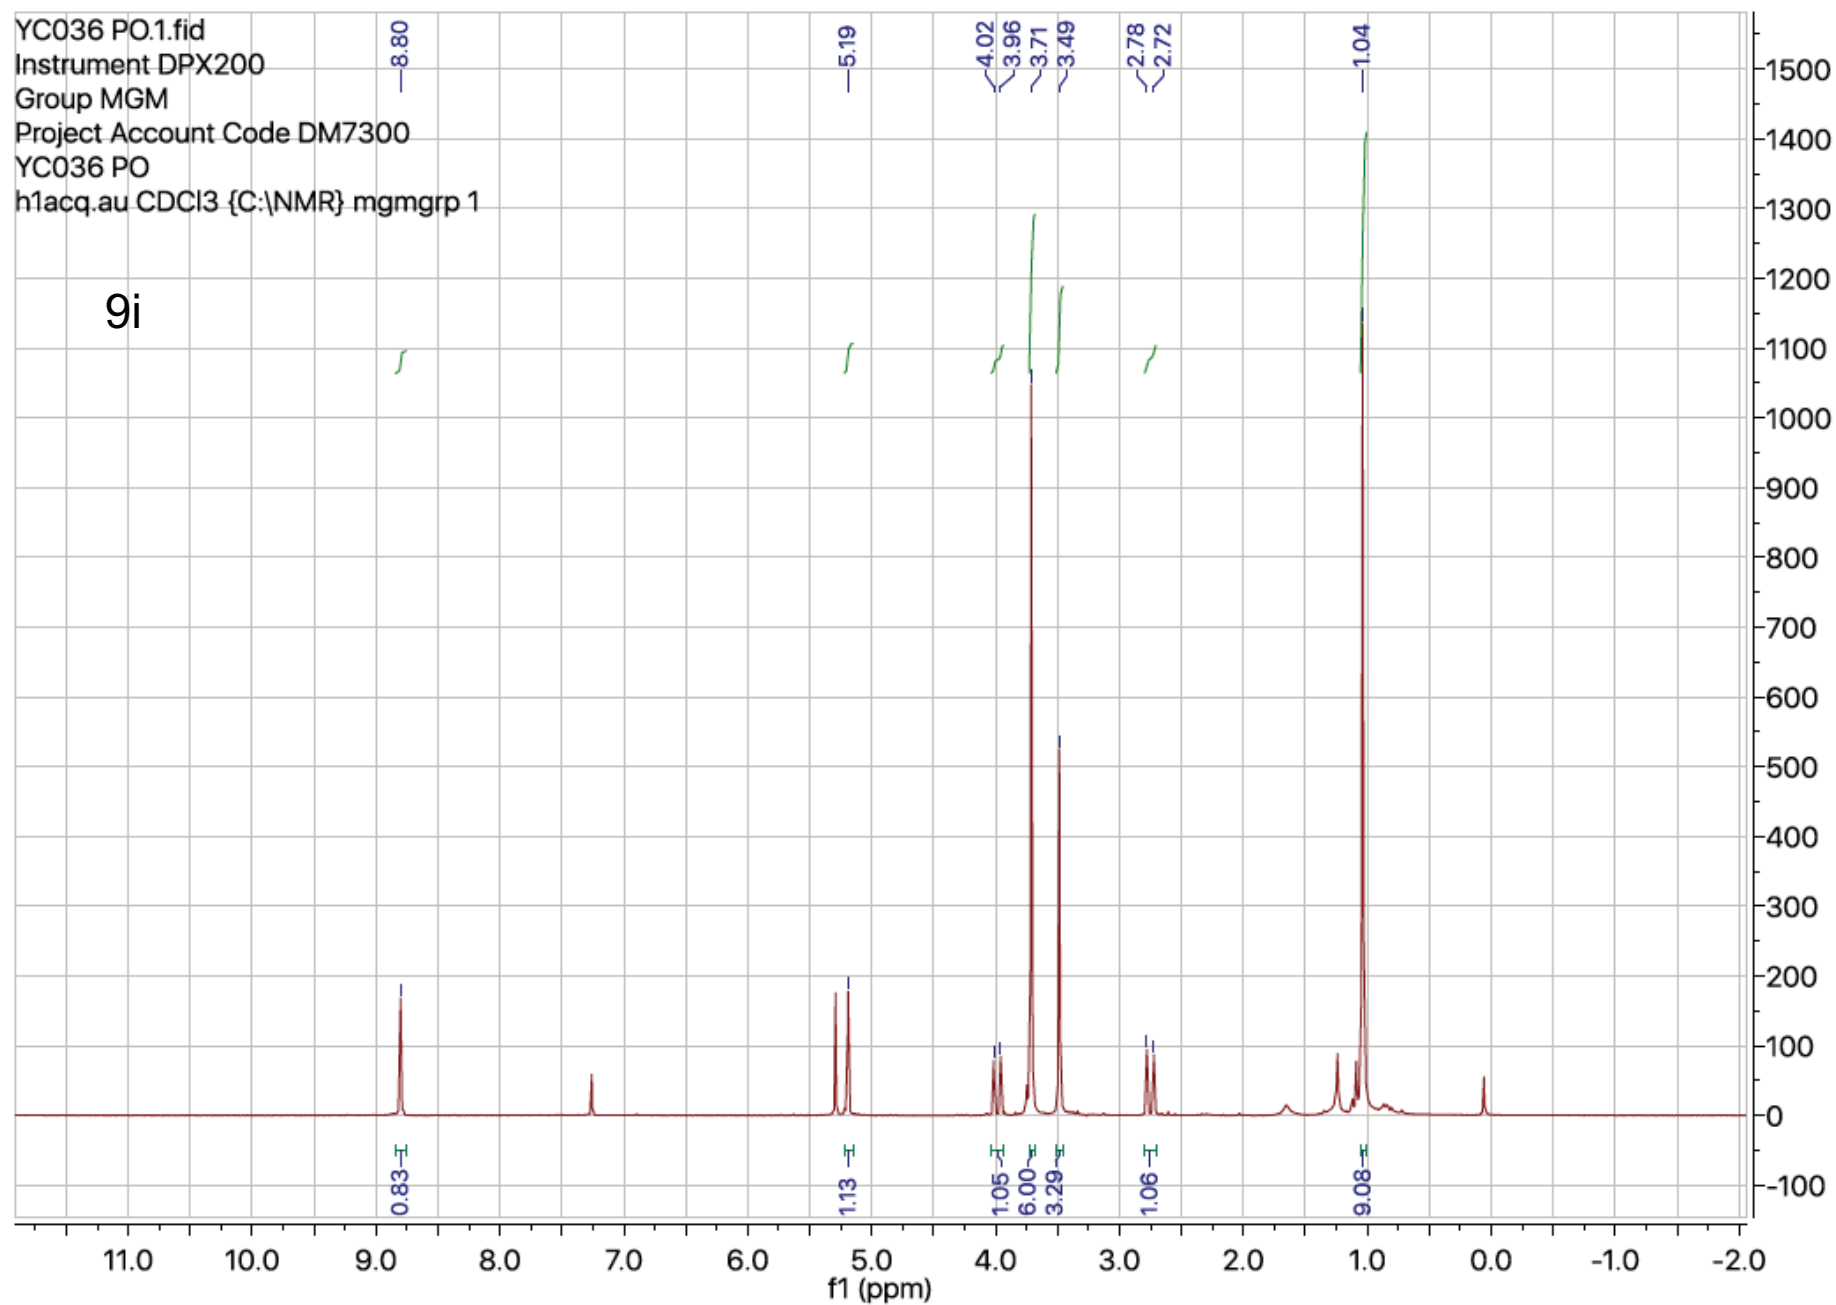

Instrument AVF400  
Chemist YIYUAN CHEN  
Group MGM  
Project Account Code DM7300  
YC033 BIO CHAR  
c13acq.crl CDC13 {C:\NMR} mmmqr 33

NMR@CHEM.OX

9i

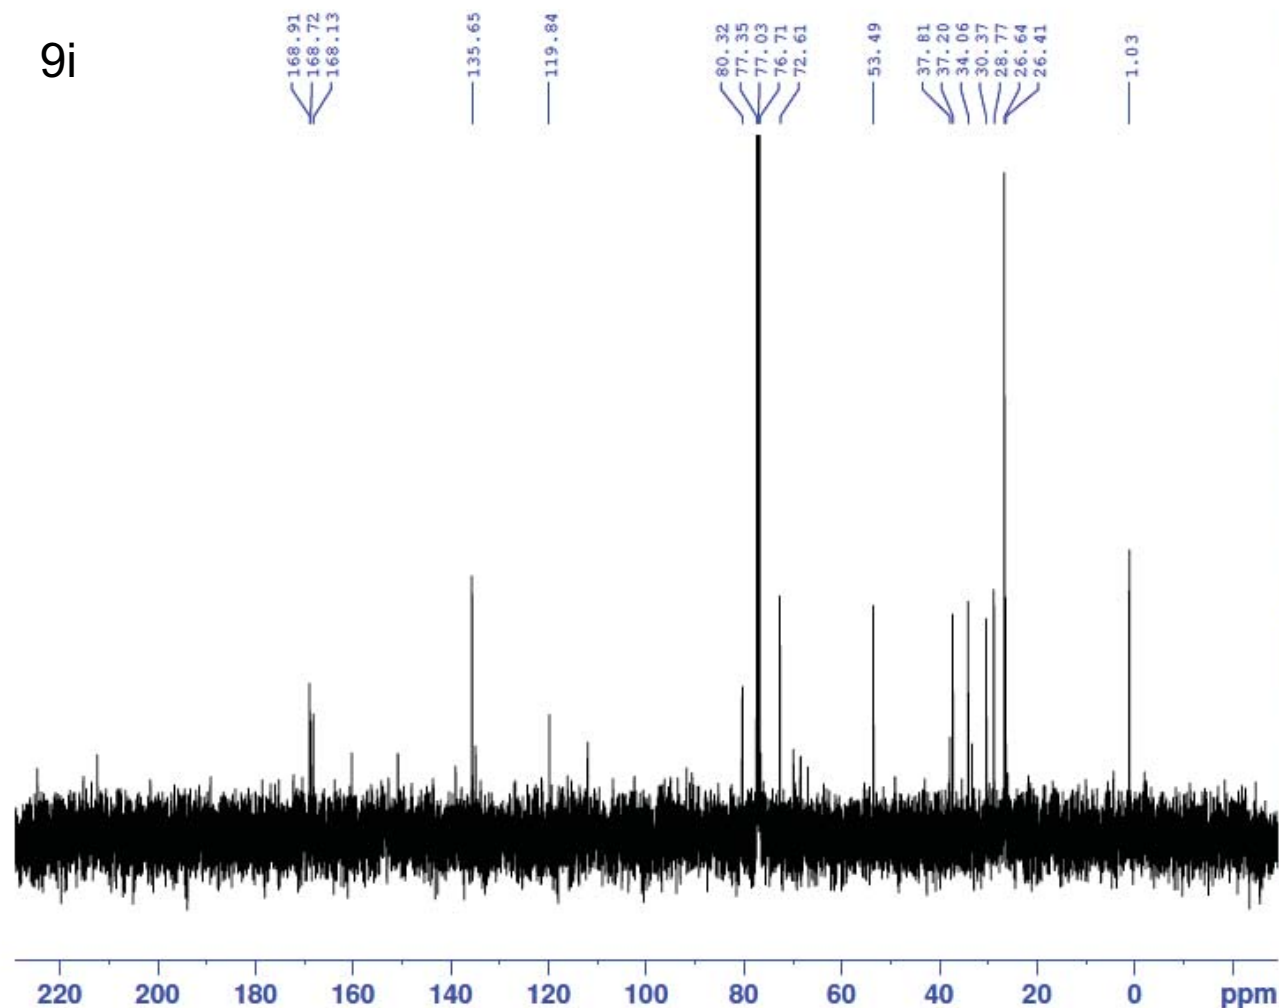

Current Data Parameters  
NAME YC033 BIO CHAR  
EXPNO 4  
PROCNO 1

F2 - Acquisition Parameters  
Date\_ 20160505  
Time 6.54 h  
INSTRUM avf400  
PROBHD Z108618\_0533 ( )  
PULPROG zgpg30  
TD 32768  
SOLVENT CDC13  
NS 256  
DS 4  
SWH 26041.666 Hz  
FIDRES 1.589457 Hz  
AQ 0.6291456 sec  
RG 205.43  
DW 19.200 usec  
DE 6.50 usec  
TE 295.5 K  
D1 1.00000000 sec  
D11 0.03000000 sec  
TD0 1  
SFO1 100.6530068 MHz  
NUC1 13C  
P1 9.00 usec  
PLW1 58.70000076 W  
SFO2 400.2516010 MHz  
NUC2 1H  
CPDPRG[2] waltz16  
PCPD2 90.00 usec  
PLW2 16.70000076 W  
PLW12 0.78397000 W  
PLW13 0.39432999 W

F2 - Processing parameters  
SI 32768  
SF 100.6429430 MHz  
WDW EM  
SSB 0  
LB 1.00 Hz  
GB 0  
PC 1.40

9j

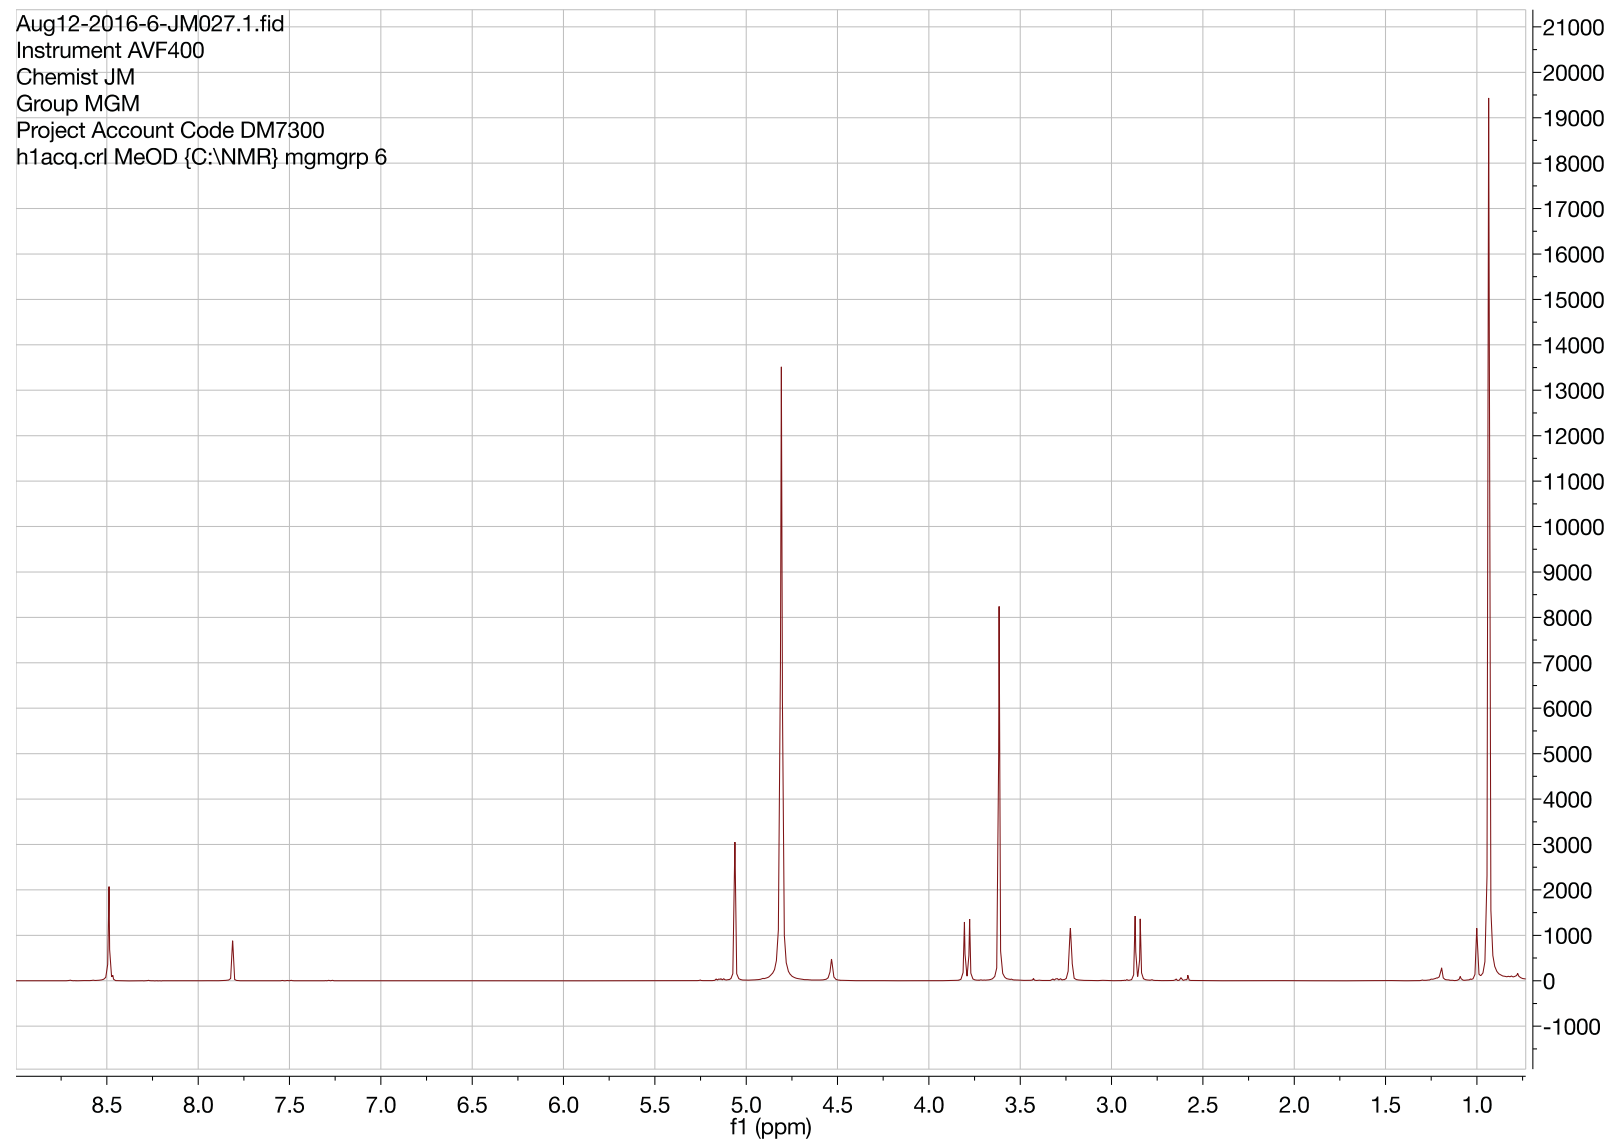

9j

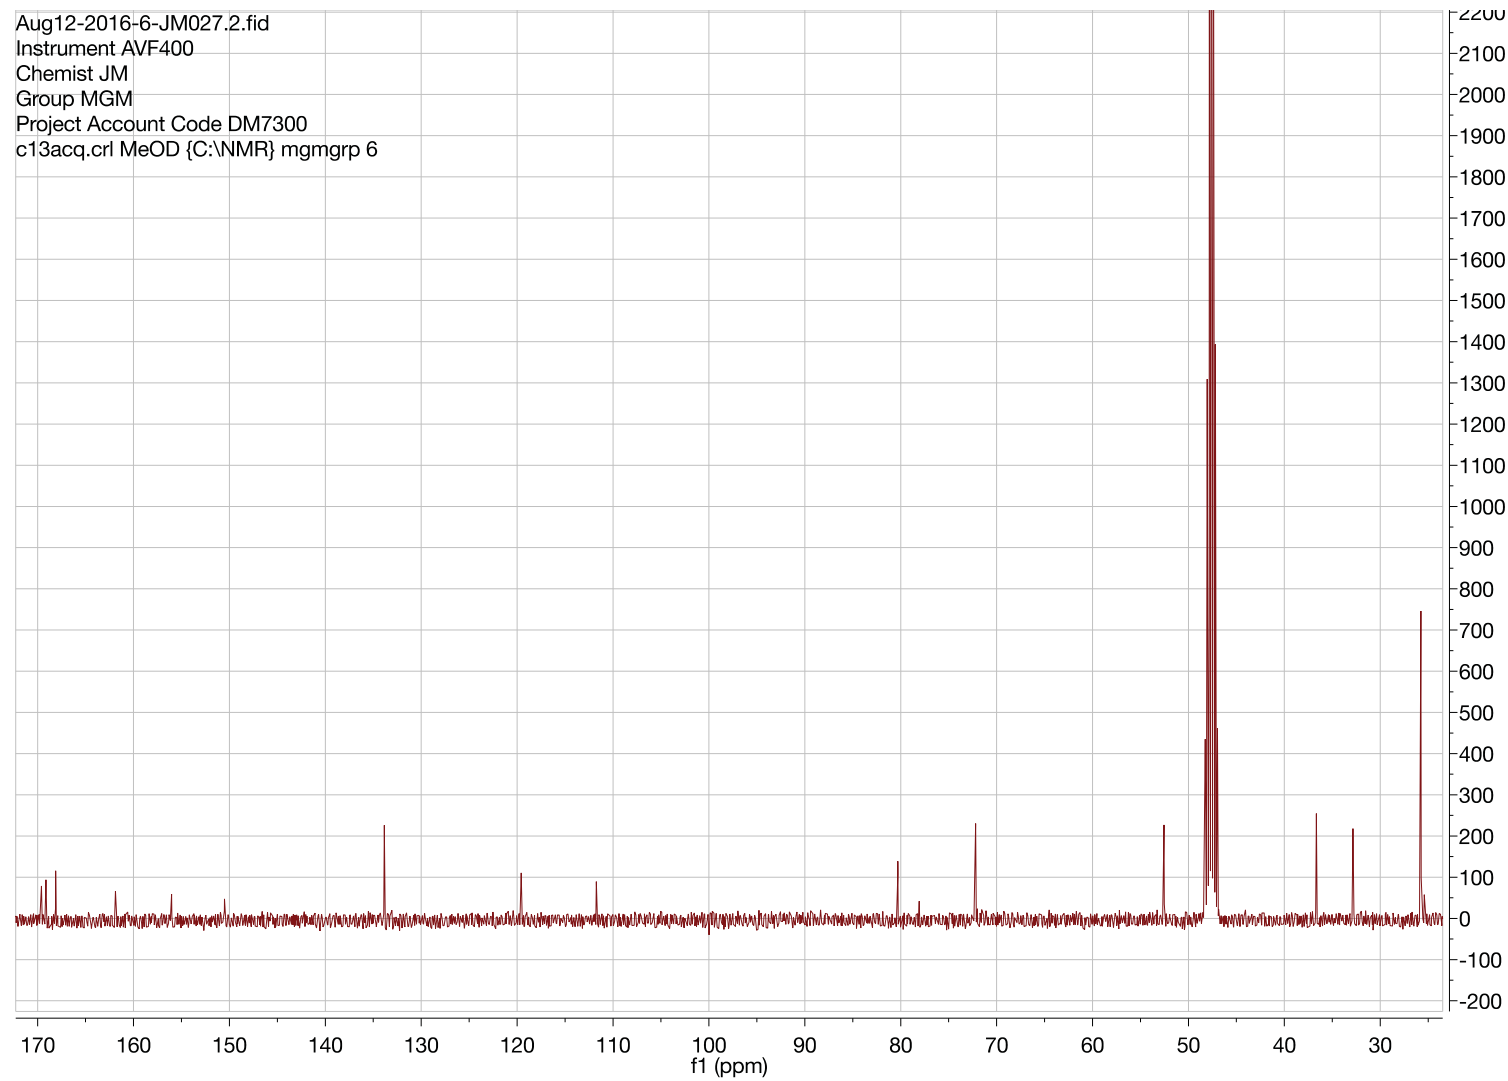

9j

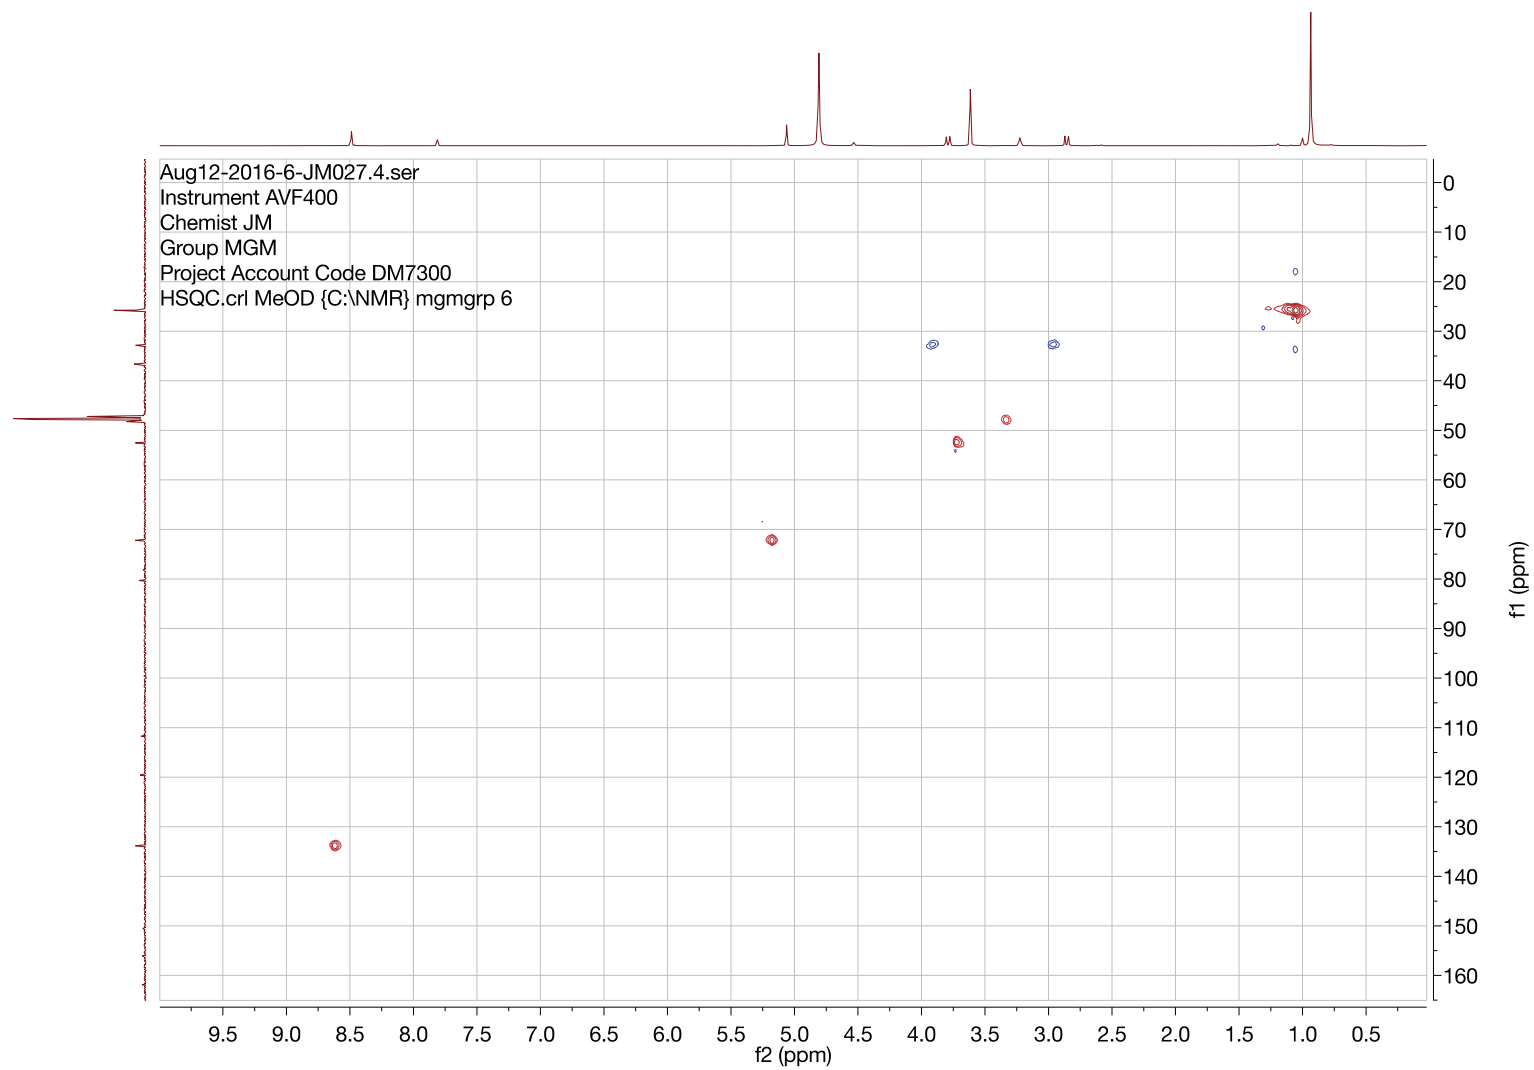

# HMBC

9j

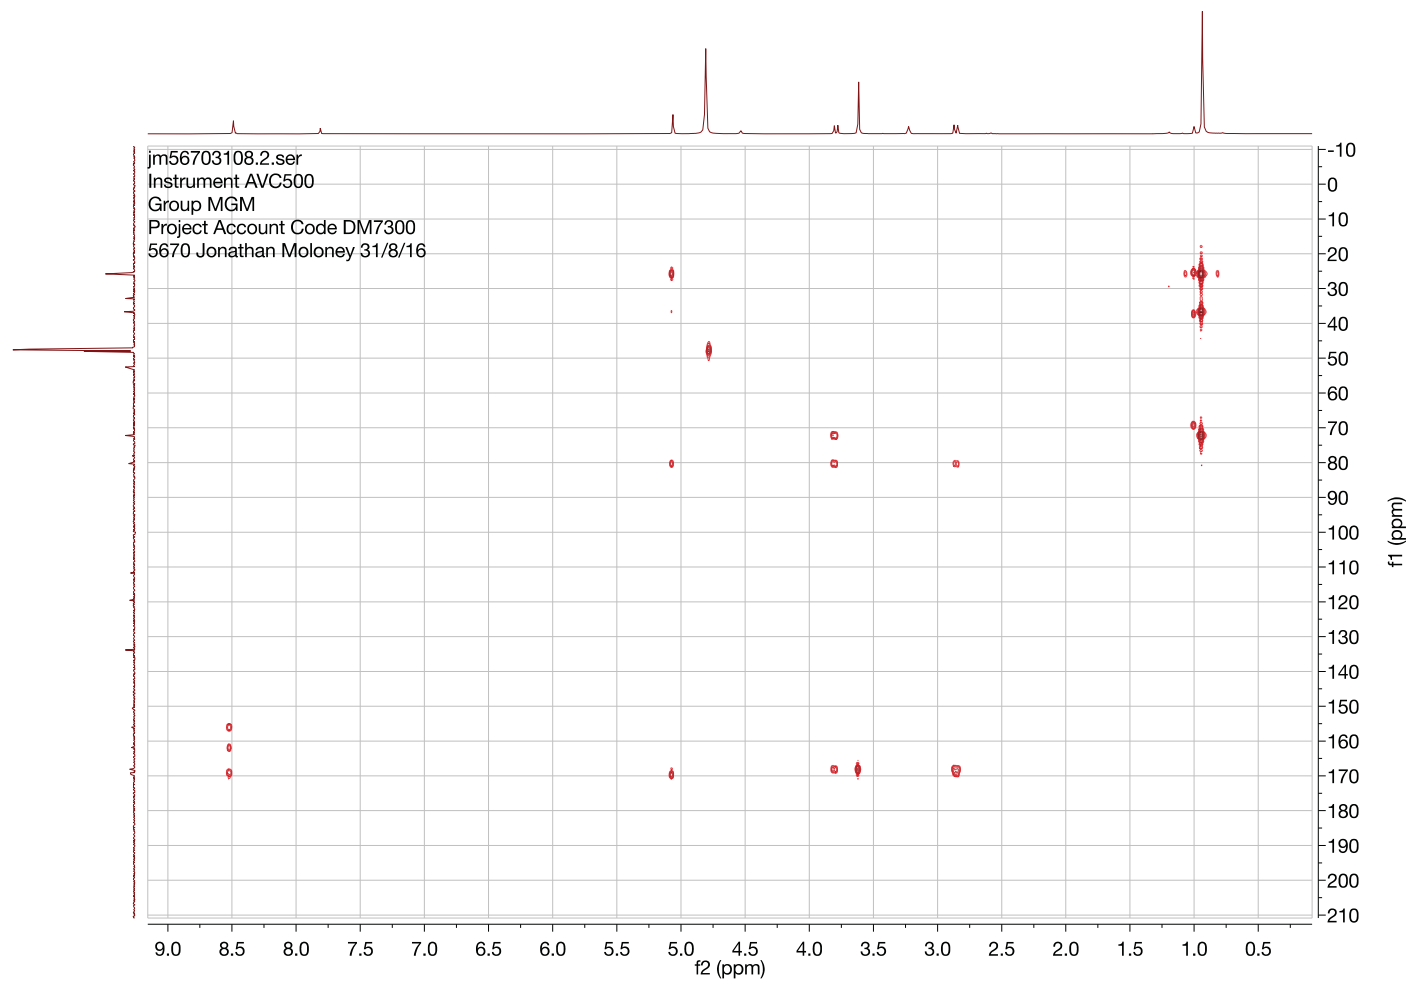



Aug18-2016-9-JM029.1.fid  
Instrument AVF400  
Chemist JM  
Group MGM  
Project Account Code DM7300  
h1acq.crl MeOD {C:\NMR} mgmgrp 9

9l

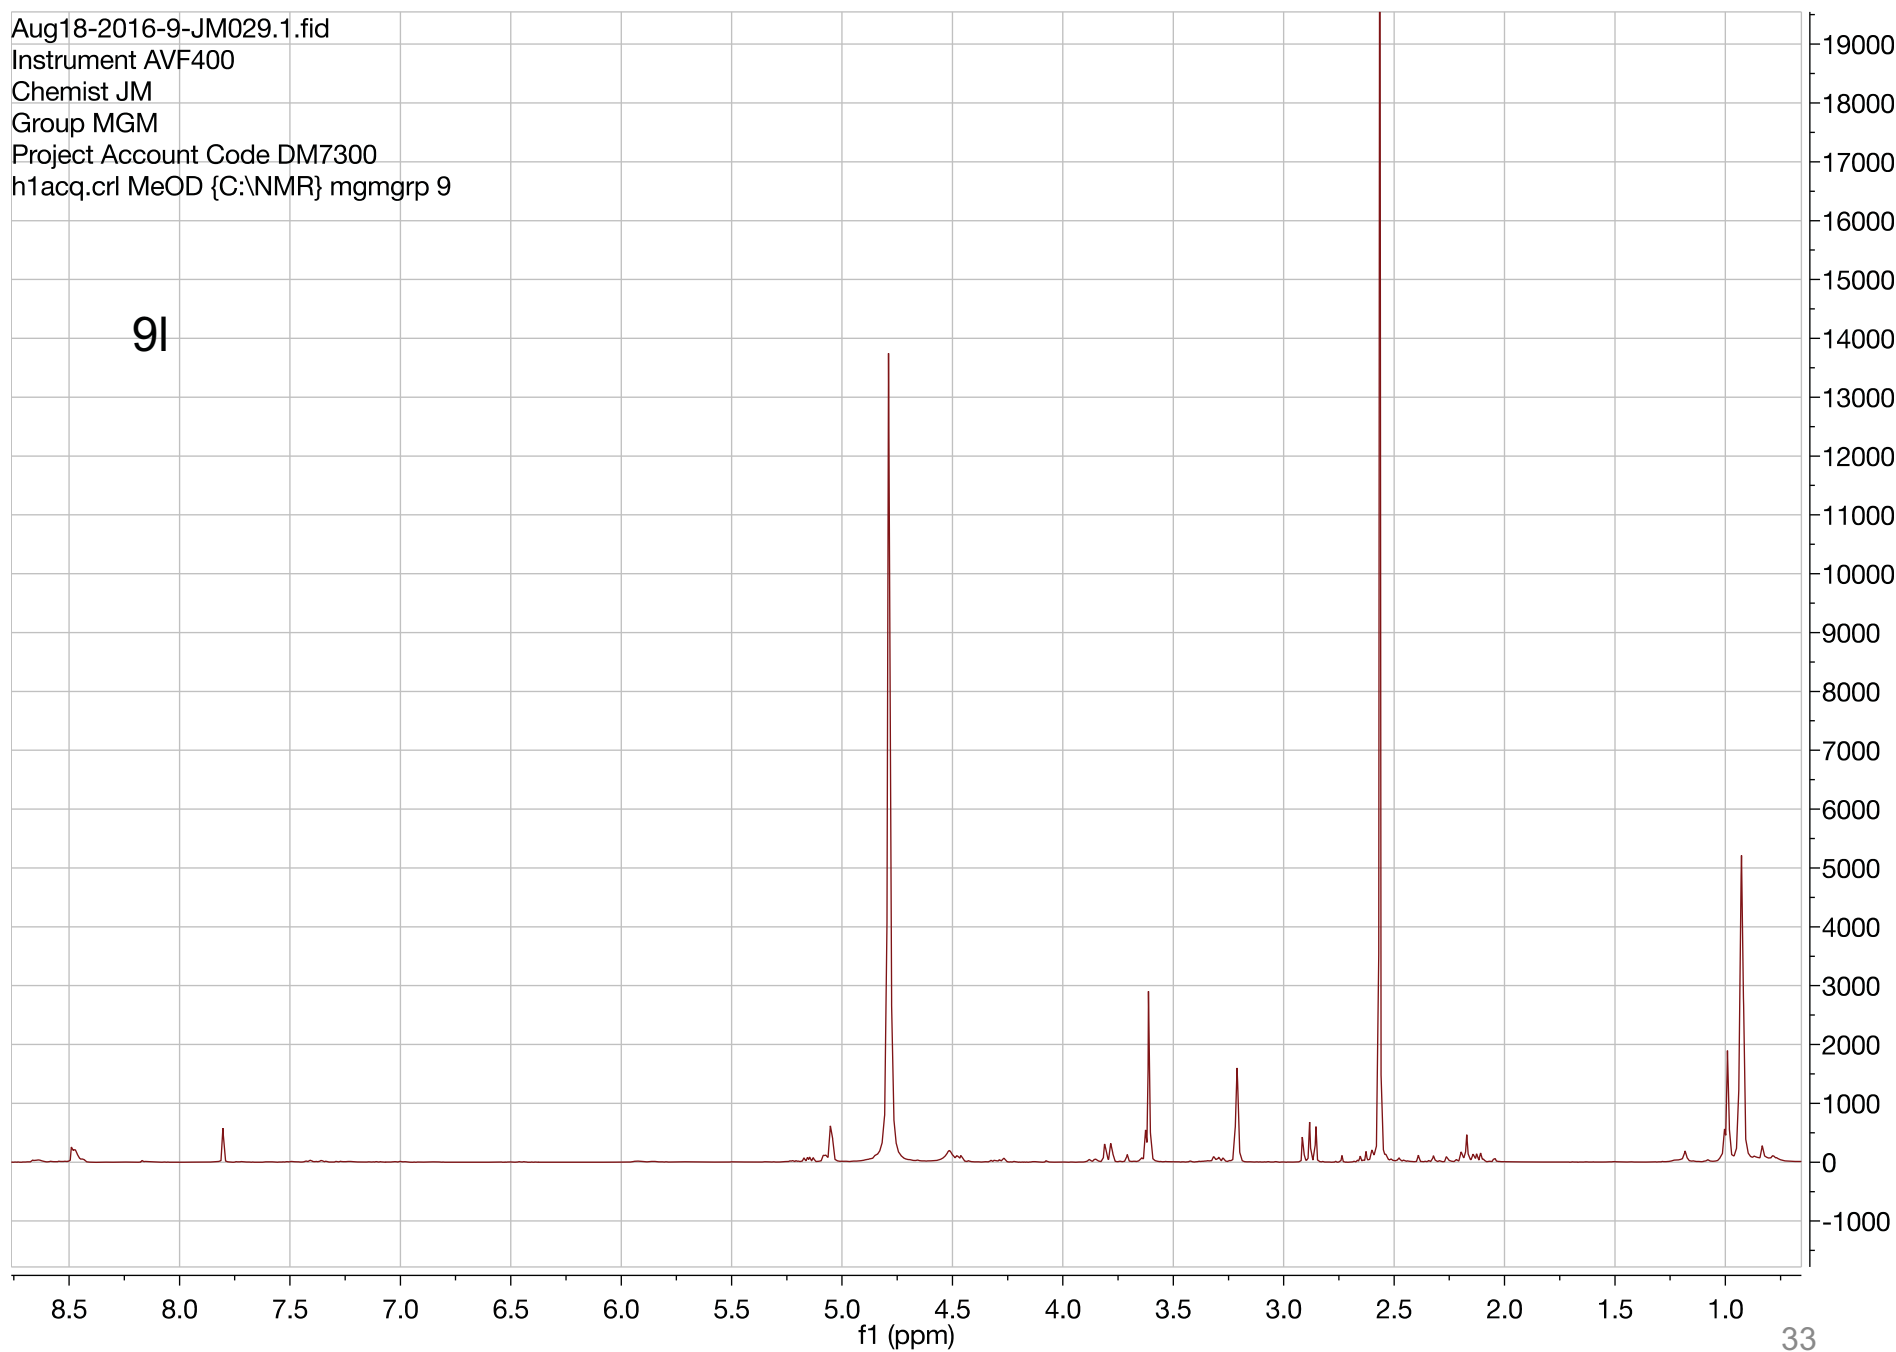

91

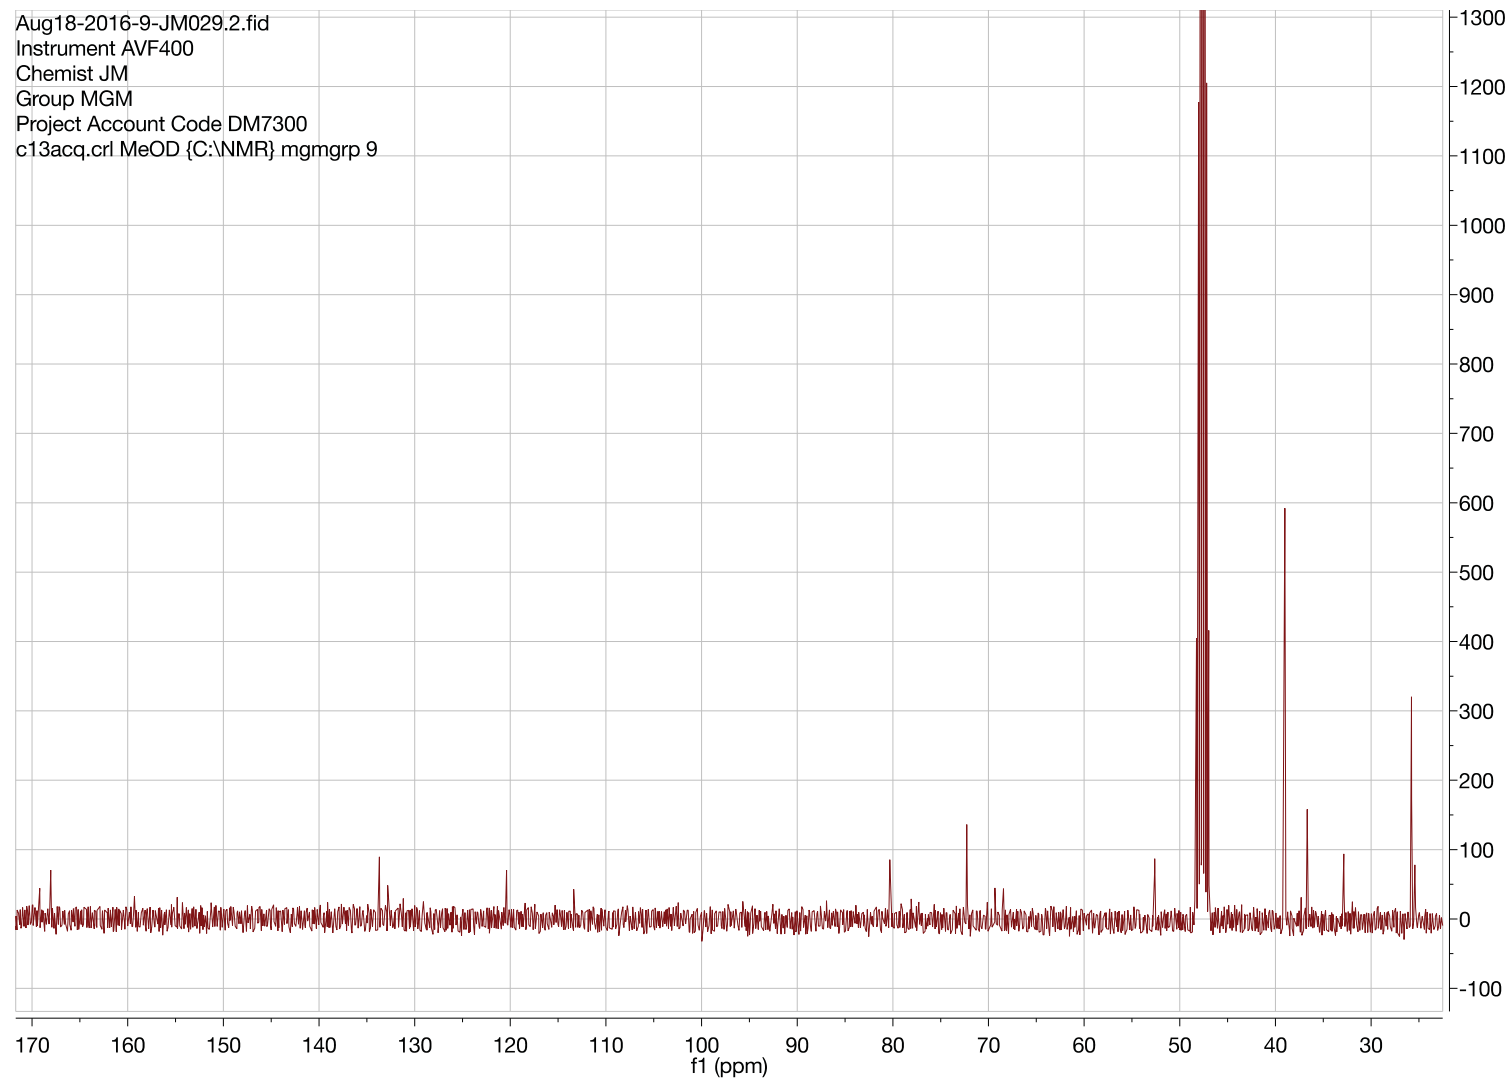

91

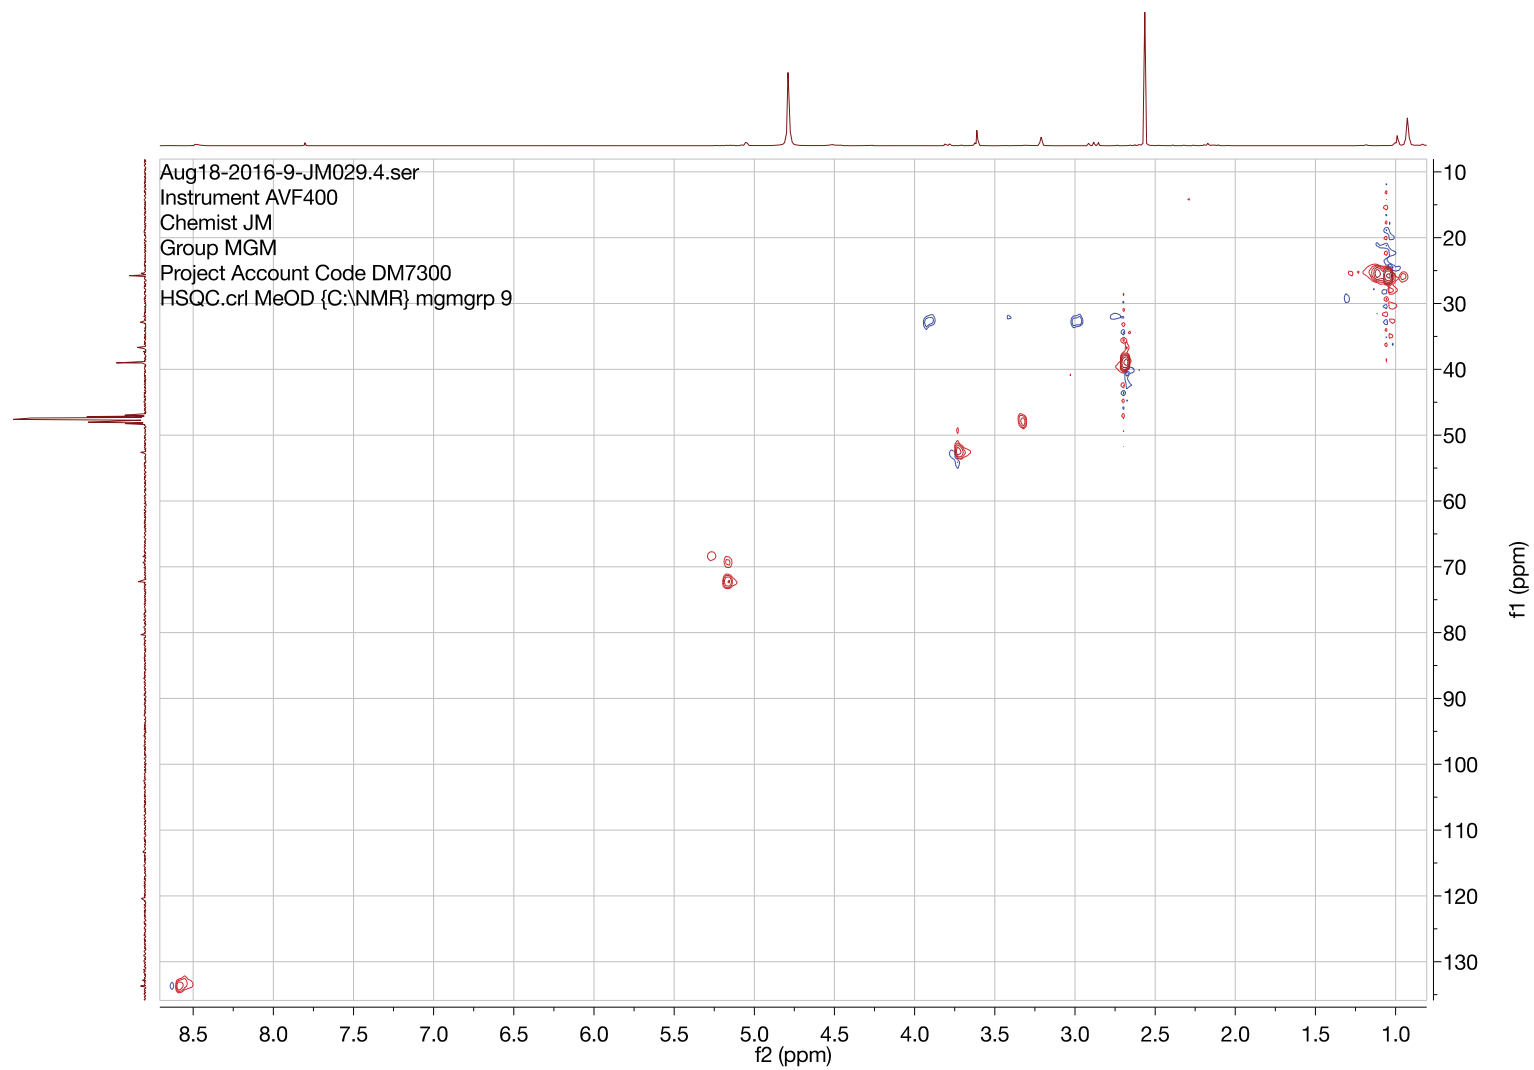

Supplement: s1 [file s1]
