# Supplementary material for: Fused-Ring Oxazolopyrrolopyridopyrimidine Systems with Gram-Negative Activity
Source: MDPI journal article supplement (doi:10.3390/antibiotics6010002), 2017-01-13
Supplement: s1 [file s1]

# Supplementary Materials: Fused-Ring Oxazolopyrrolopyridopyrimidine Systems with Gram-Negative Activity

Yiyuan Chen, Jonathan G. Moloney, Kirsten E. Christensen and Mark G. Moloney

**Table S1.** Bioassay data for Ceph. C.

| Bioassays Plate Calibration with Cephalosporin C (MW 415.4) |                    |                  |                    |                        |                 |                    |
|-------------------------------------------------------------|--------------------|------------------|--------------------|------------------------|-----------------|--------------------|
| Stock Solution<br>μg/mL                                     | Ceph. C<br>μL/well | Water<br>μL/well | Ceph. C<br>μL/well | Ceph. C<br>mmoles/well | Zone Size<br>mm | Log<br>(mmol/well) |
| <i>For Escherichia coli</i>                                 |                    |                  |                    |                        |                 |                    |
| 10                                                          | 20                 | 80               | 0.2                | 0.481463649            | n/a             | −0.317             |
|                                                             | 40                 | 60               | 0.4                | 0.962927299            | n/a             | −0.016             |
|                                                             | 60                 | 40               | 0.6                | 1.444390948            | 14.5            | 0.160              |
|                                                             | 80                 | 20               | 0.8                | 1.925854598            | 16.5            | 0.285              |
|                                                             | 100                | 0                | 1                  | 2.407318247            | 21              | 0.382              |
| <i>For Escherichia coli</i>                                 |                    |                  |                    |                        |                 |                    |
| 100                                                         | 20                 | 80               | 2                  | 4.814636495            | 36.5            | 0.683              |
|                                                             | 40                 | 60               | 4                  | 9.62927299             | 40              | 0.984              |
|                                                             | 60                 | 40               | 6                  | 14.44390948            | 40.5            | 1.160              |
|                                                             | 80                 | 20               | 8                  | 19.25854598            | 41.5            | 1.285              |
|                                                             | 100                | 0                | 10                 | 24.07318247            | 42.5            | 1.382              |
| <i>For Staphylococcus aureus</i>                            |                    |                  |                    |                        |                 |                    |
| 1000                                                        | 20                 | 80               | 20                 | 48.1463495             | n/a             | 1.683              |
|                                                             | 40                 | 60               | 40                 | 96.2927299             | n/a             | 1.984              |
|                                                             | 60                 | 40               | 60                 | 144.4390948            | n/a             | 2.160              |
|                                                             | 80                 | 20               | 80                 | 192.5854598            | 15.5            | 2.285              |
|                                                             | 100                | 0                | 100                | 240.7318247            | 17.5            | 2.382              |

n/a = not active.

**Table S2.** Bioassay data for solvents.

| Solvent                      | Bioactivity |
|------------------------------|-------------|
| 50% DMSO in MeOH             | n/a         |
| 50% DMSO in H <sub>2</sub> O | n/a         |
| 70% DMSO in H <sub>2</sub> O | n/a         |
| Pure DMSO                    | n/a         |

n/a = not active.

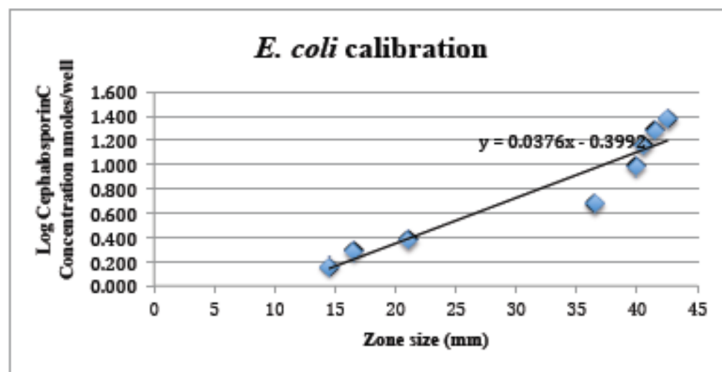Figure S1. *E. coli* calibration.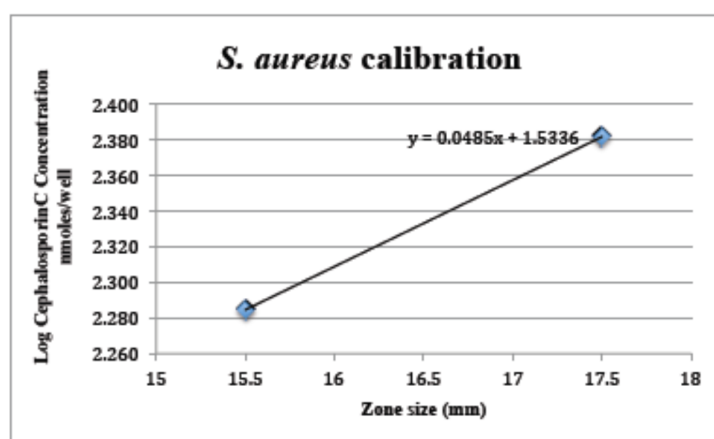Figure S2. *S. aureus* calibration.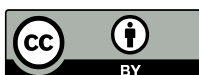

© 2017 by the authors; licensee MDPI, Basel, Switzerland. This article is an open access article distributed under the terms and conditions of the Creative Commons by Attribution (CC-BY) license (<http://creativecommons.org/licenses/by/4.0/>).
